# Supplementary material for: Observation of an oxonium ion intermediate in ethanol dehydration to ethene on zeolite
Source: PubMed Central journal article supplement (PMC6488627; doi:10.1038/s41467-019-09956-7), 2019-04-29
Supplement: 41467_2019_9956_MOESM1_ESM.pdf [file 41467_2019_9956_MOESM1_ESM.pdf]

## **Supplementary Information**

### **Observation of An Oxonium Ion Intermediate in Ethanol Dehydration to Ethene on Zeolite**

Zhou et al.

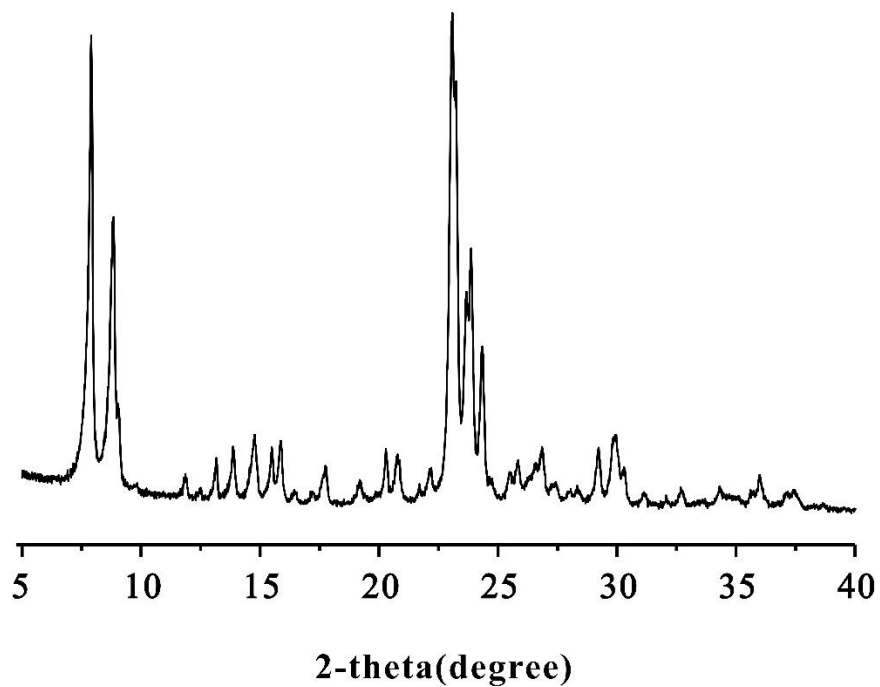

**Supplementary Figure 1.** XRD pattern of H-ZSM-5 zeolite.

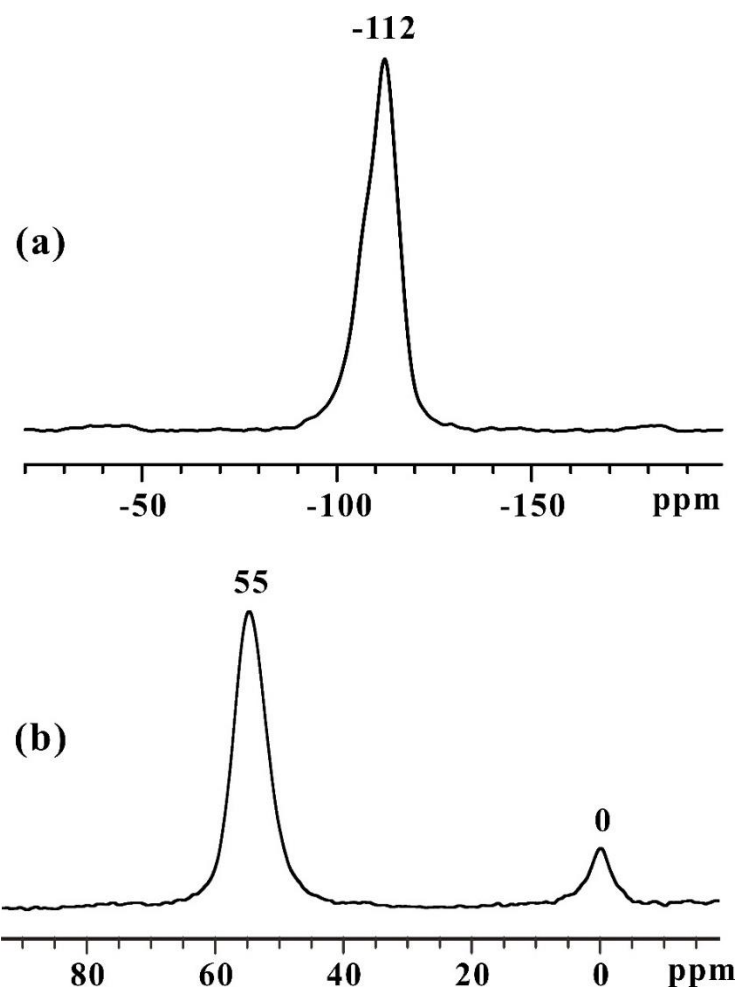

**Supplementary Figure 2.**  $^{29}\text{Si}$  (a) and  $^{27}\text{Al}$  (b) MAS NMR spectra of H-ZSM-5 zeolite.

The signals at 55 ppm and 0 ppm on spectrum (b) are ascribed to framework tetrahedral Al and extra-framework octahedral Al respectively.

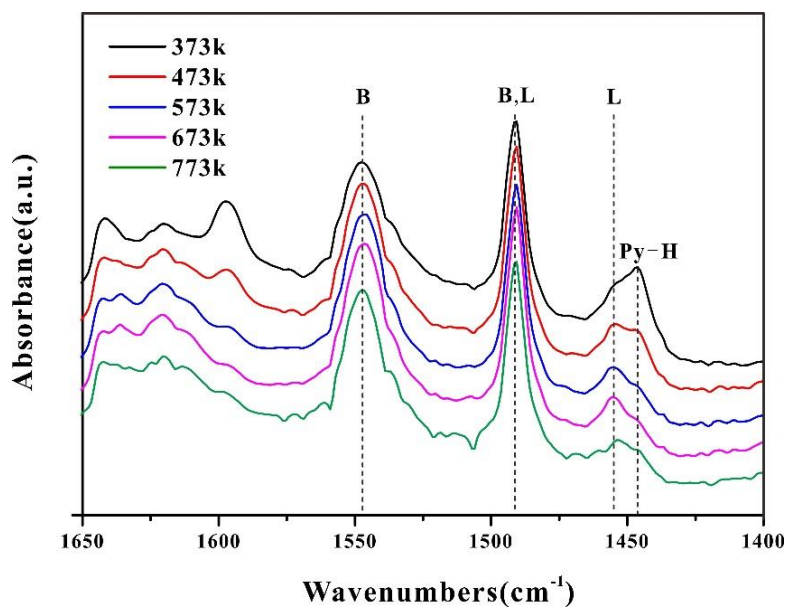

**Supplementary Figure 3.** FT-IR spectra of pyridine adsorbed on H-ZSM-5 after evacuation at different temperatures. The B, L, and Py-H peaks represent Brønsted acid sites, Lewis acid sites and hydrogen bonded pyridine, respectively. The amount of Brønsted acid site and Lewis acid site (extra-framework alumina) is determined to be  $1.03 \text{ mmol.g}^{-1}$  and  $0.08 \text{ mmol.g}^{-1}$  respectively.

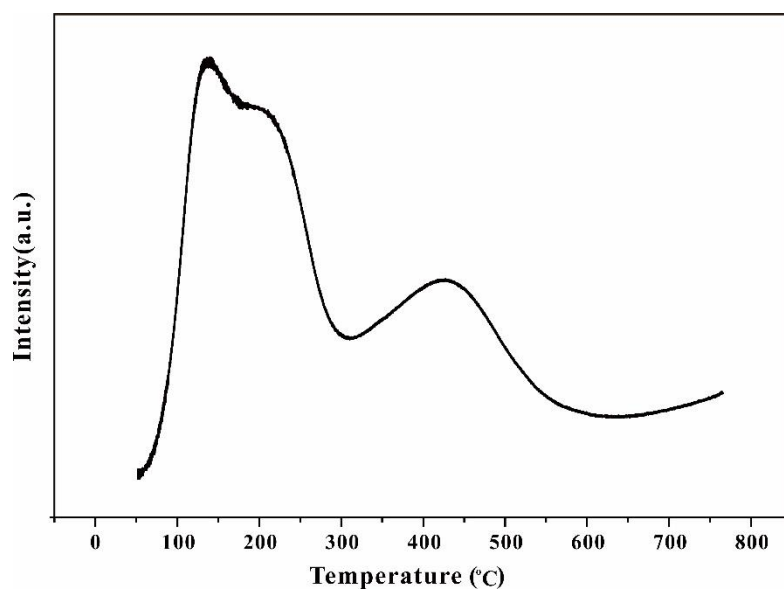

**Supplementary Figure 4.** NH<sub>3</sub>-TPD profile of H-ZSM-5 zeolite. Three different NH<sub>3</sub> desorption temperature features (100-200, 200-320 and 350-550°C) indicate three kinds of acid sites with different acid strength, namely weak, medium and strong acid strengths respectively.

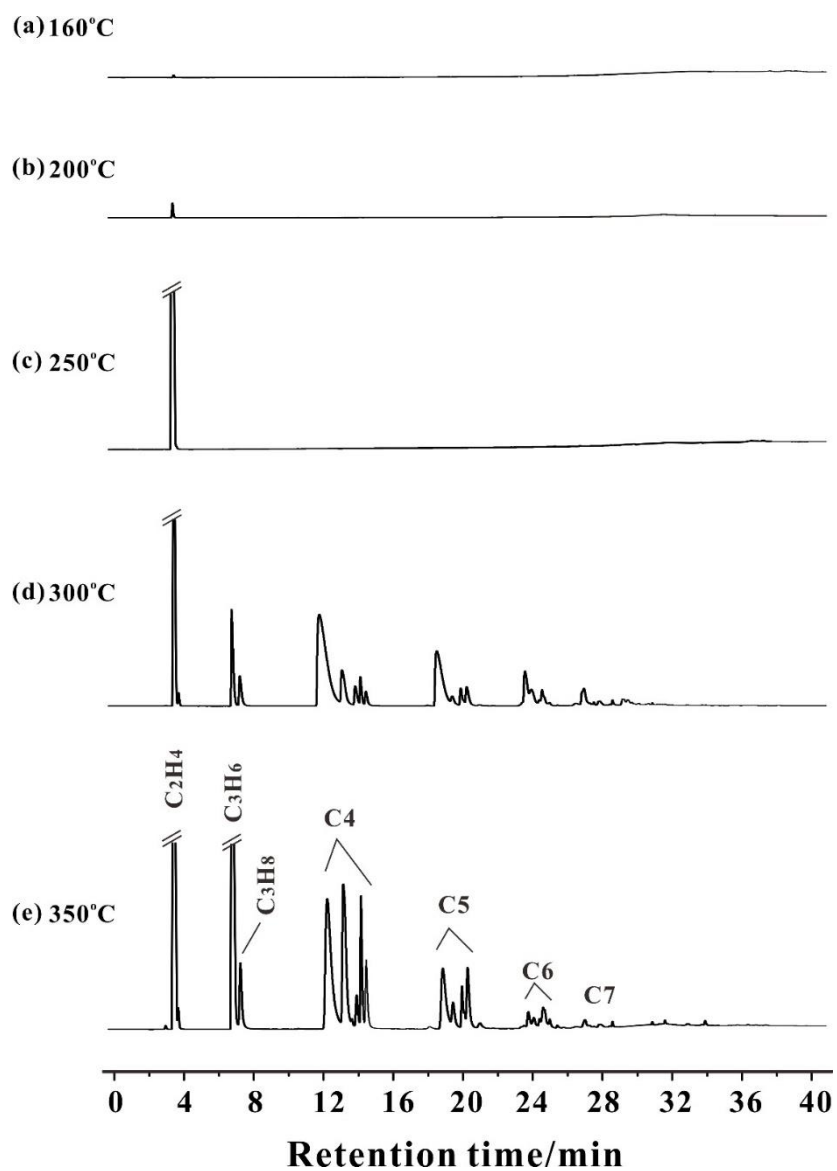

**Supplementary Figure 5.** GC analysis of effluent products obtained from pulsing ethanol reaction over H-ZSM-5 for 4 s at different temperatures.

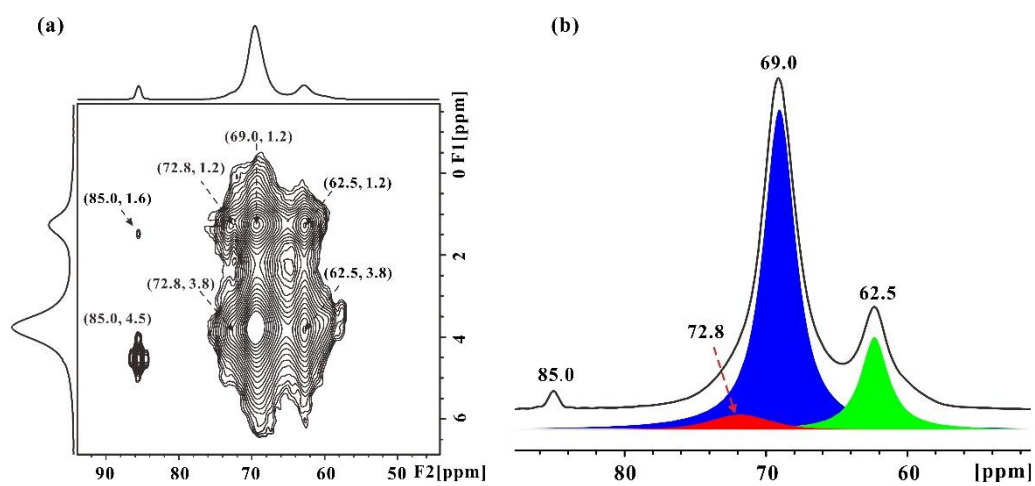

**Supplementary Figure 6.** 2D  $^1\text{H}$ - $^{13}\text{C}$  HETCOR MAS NMR spectrum (a) and signal deconvolution of the  $^{13}\text{C}$  CP MAS NMR spectrum (b) of trapped species on H-ZSM-5 obtained from reaction of  $\text{CH}_3^{13}\text{CH}_2\text{OH}$  at 200 °C for 4 s. The 72.8 ppm signal is due to the methylene carbon of ethoxy species.

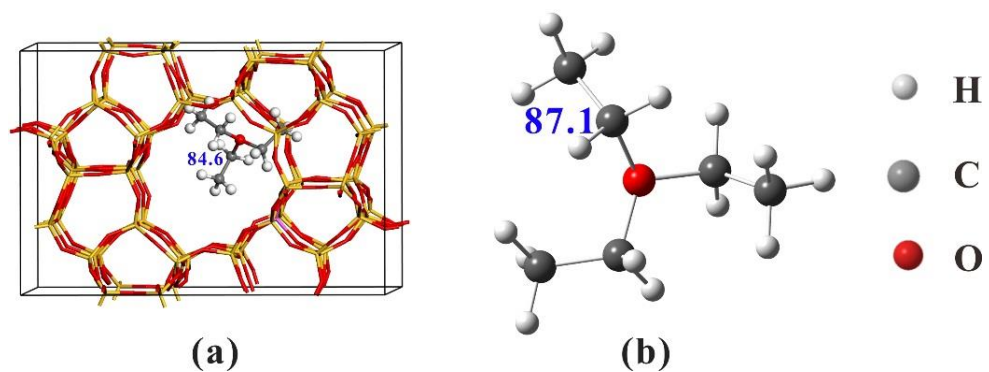

**Supplementary Figure 7.** Theoretically optimized structure of triethyloxonium ion (TEO) in ZSM-5 channel (a) and in gas state (b). The predicted  $^{13}\text{C}$  chemical shift (in ppm) is indicated for one of the three methylene carbon atoms.



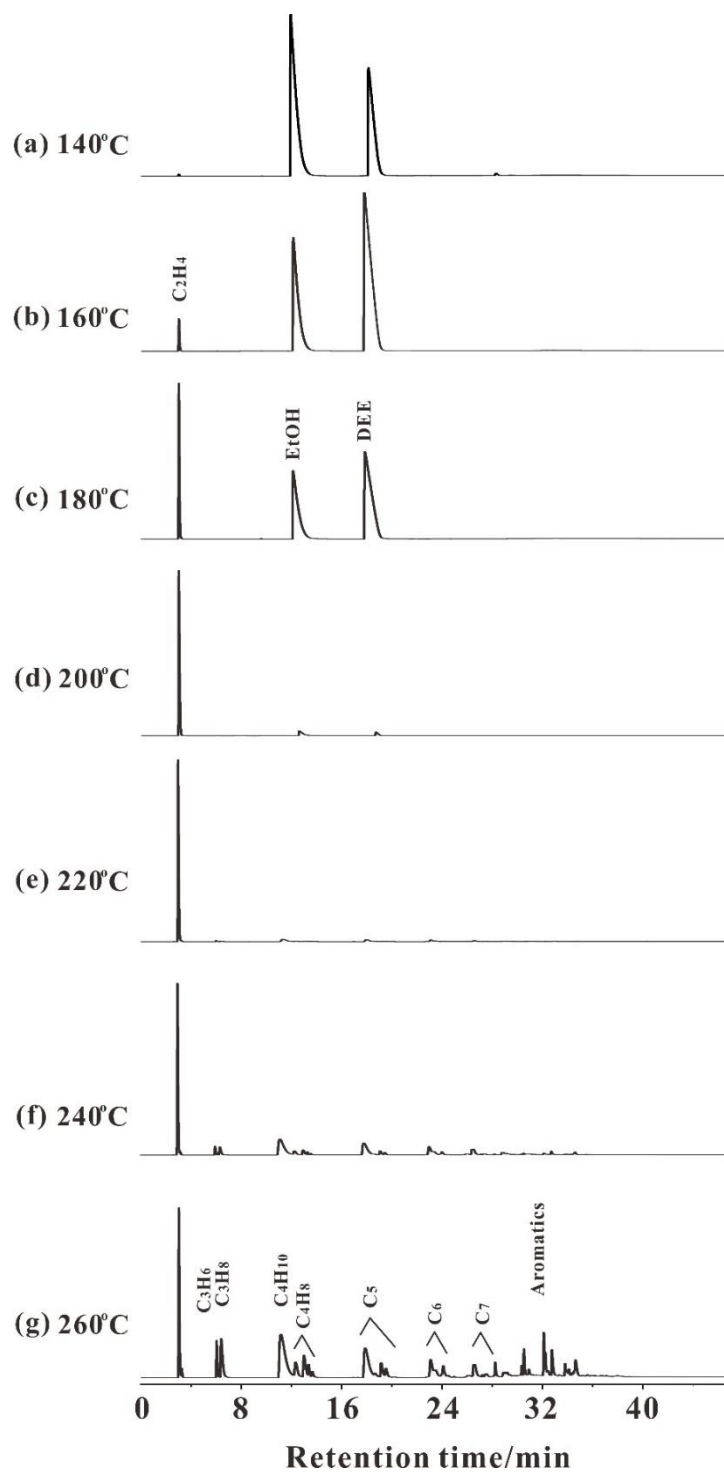

**Supplementary Figure 8.** GC analysis of effluent products obtained from continue-flow reaction of ethanol over H-ZSM-5 for 10 min at different temperatures.

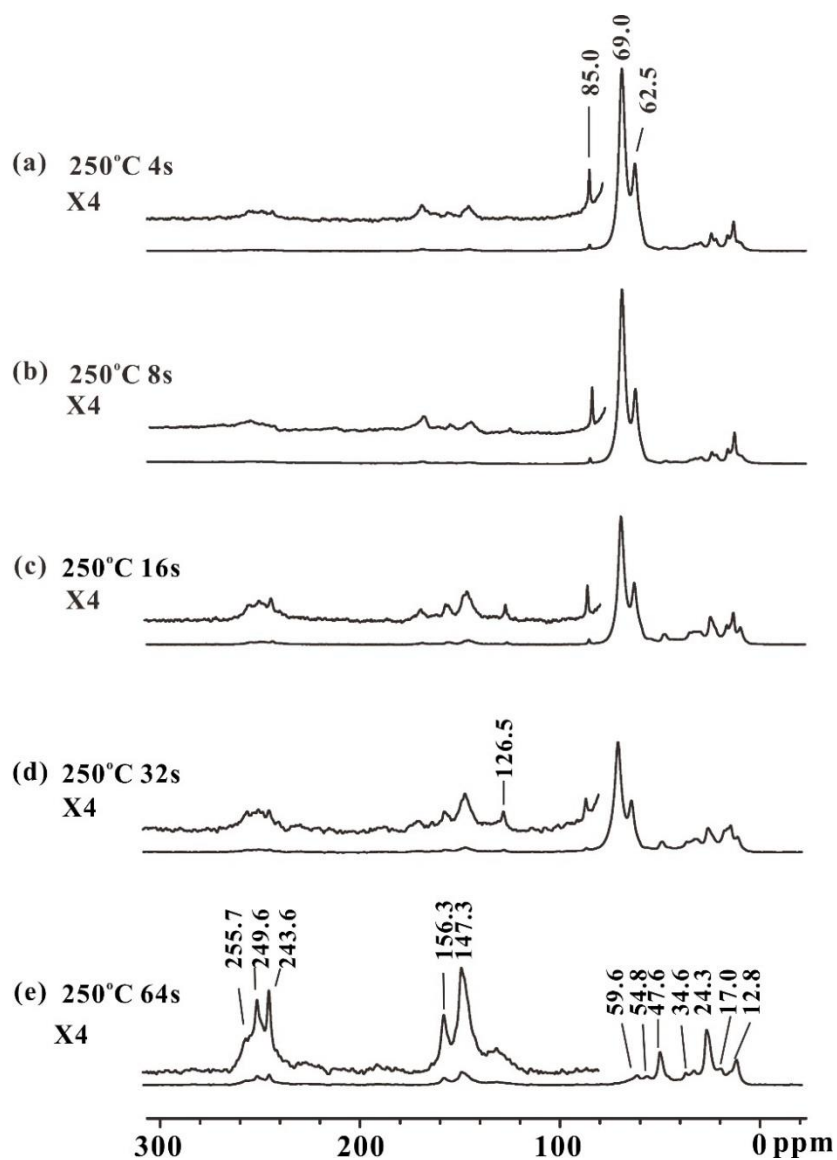

**Supplementary Figure 9.**  $^{13}\text{C}$  CP MAS NMR spectra of trapped species on H-ZSM-5 obtained from pulse-quench reactions of  $\text{CH}_3^{13}\text{CH}_2\text{OH}$  at 250 °C for different time.

**Supplementary Table 1.** Integrated  $^{13}\text{C}$  signal intensity of TEO (85.0 ppm) and ethoxy species (72.8 ppm) in the reaction. The intensity is normalized to that of 85.0 ppm signal at reaction time of 4s.

| Sample | 85.0 ppm | 72.8 ppm |
|--------|----------|----------|
| 4s     | 1        | 18.94    |
| 8s     | 0.93     | 16.84    |
| 16s    | 0.52     | 8.23     |
| 32s    | 0.36     | 4.57     |

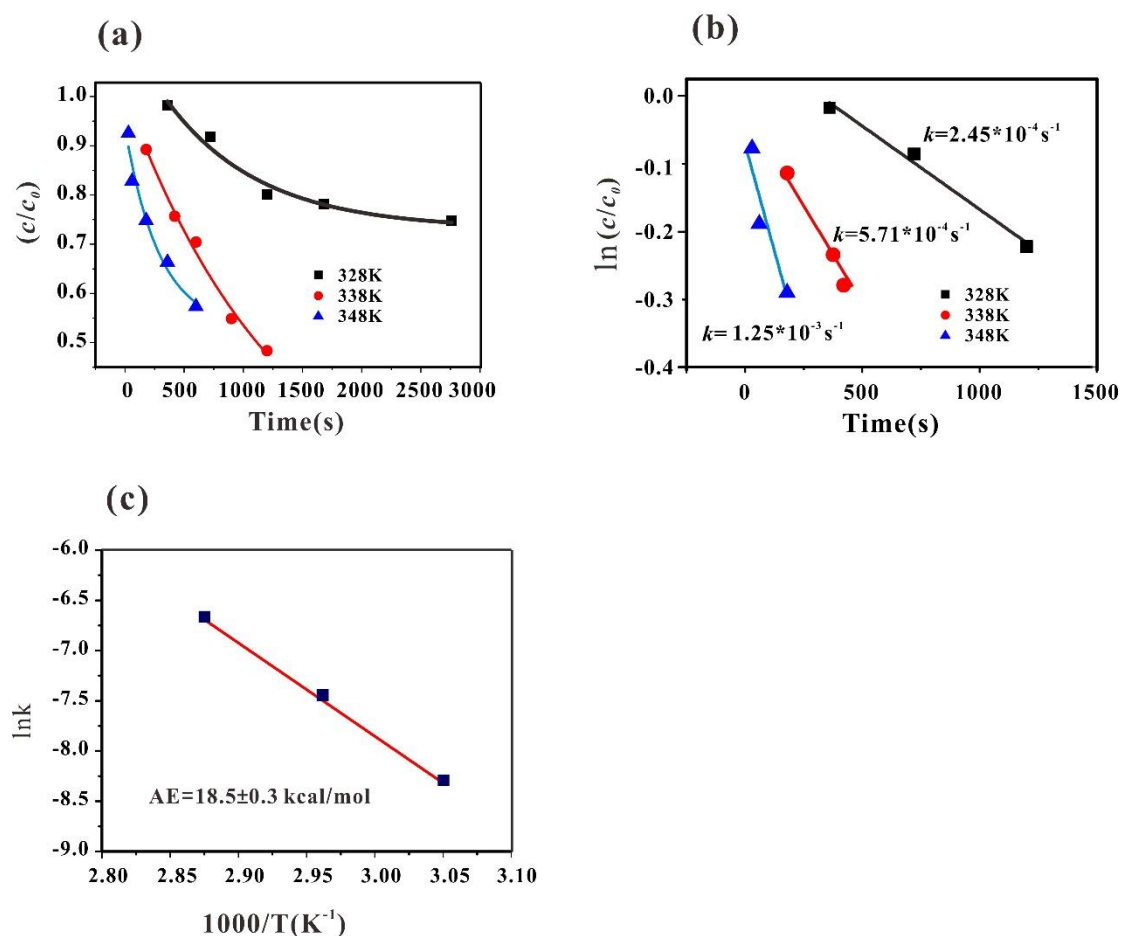

**Supplementary Figure 10.** The normalized concentration of TEO determined by  $^{13}\text{C}$  MAS NMR as a function of reaction time at different temperatures (a), the analysis of initial reaction rate constants (at low TEO conversion) at different temperatures (b), and Arrhenius plot for the measurement of the activation energy of formation of ethoxy species from TEO by  $^{13}\text{C}$  MAS NMR (c). Assuming that the TEO conversion follows the first order reaction rate equation:  $\ln(c/c_0) = -kt + A$ , in which  $c_0$  is the initial reactant concentration,  $t$  is reaction time,  $c$  is the reactant concentration at reaction time  $t$ ,  $k$  is the reaction rate constant and  $A$  is the constant.

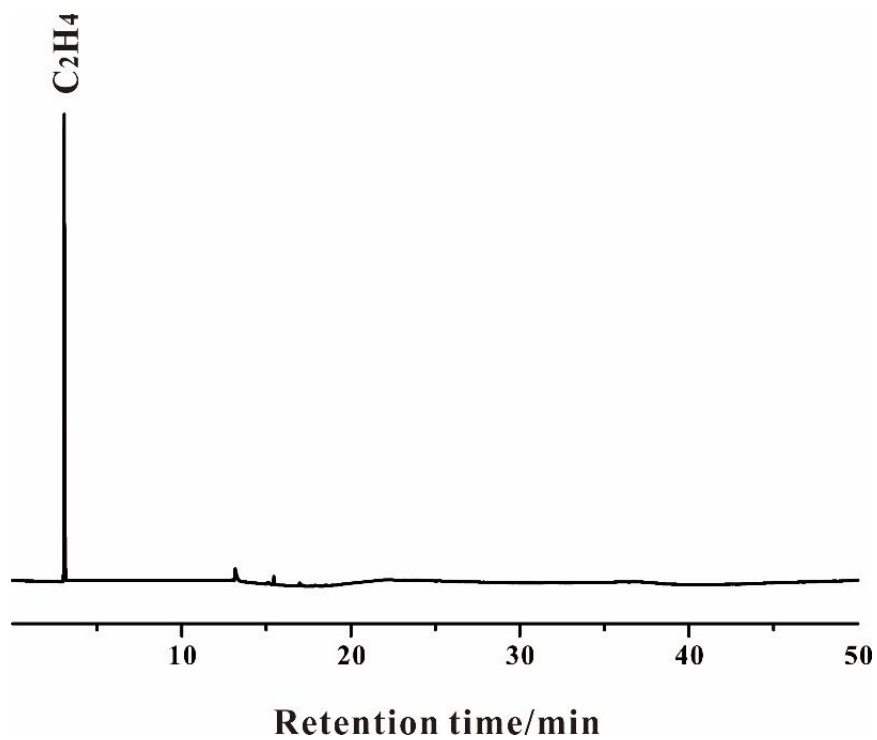

**Supplementary Figure 11.** GC analysis of the effluent product obtained by heating TEO-ZSM-5 at 200 °C for 5min.

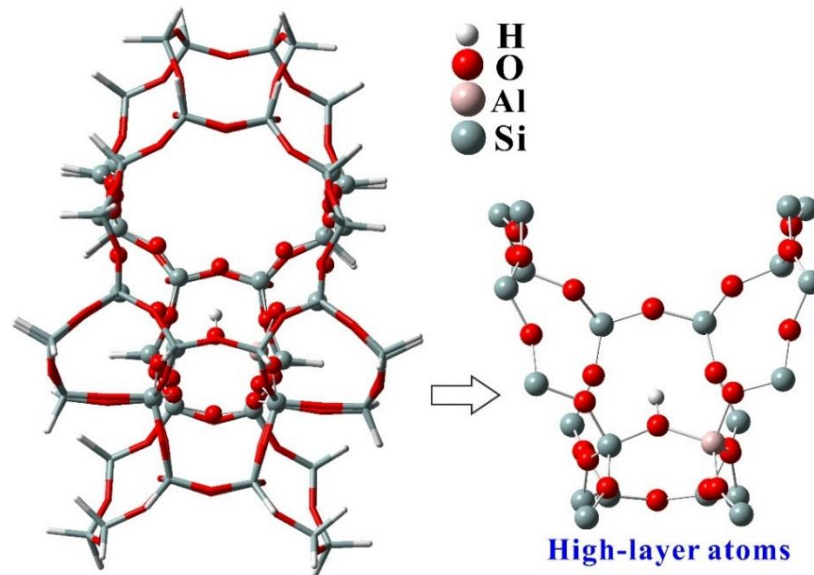

**Supplementary Figure 12.** Representation of H-ZSM-5 zeolite by a 72 T model (HSi71AlO179, 252 atoms). The 22T active site atoms (HSi21AlO25, 48 atoms) and the adsorbed hydrocarbon complex were treated as the high-layer.

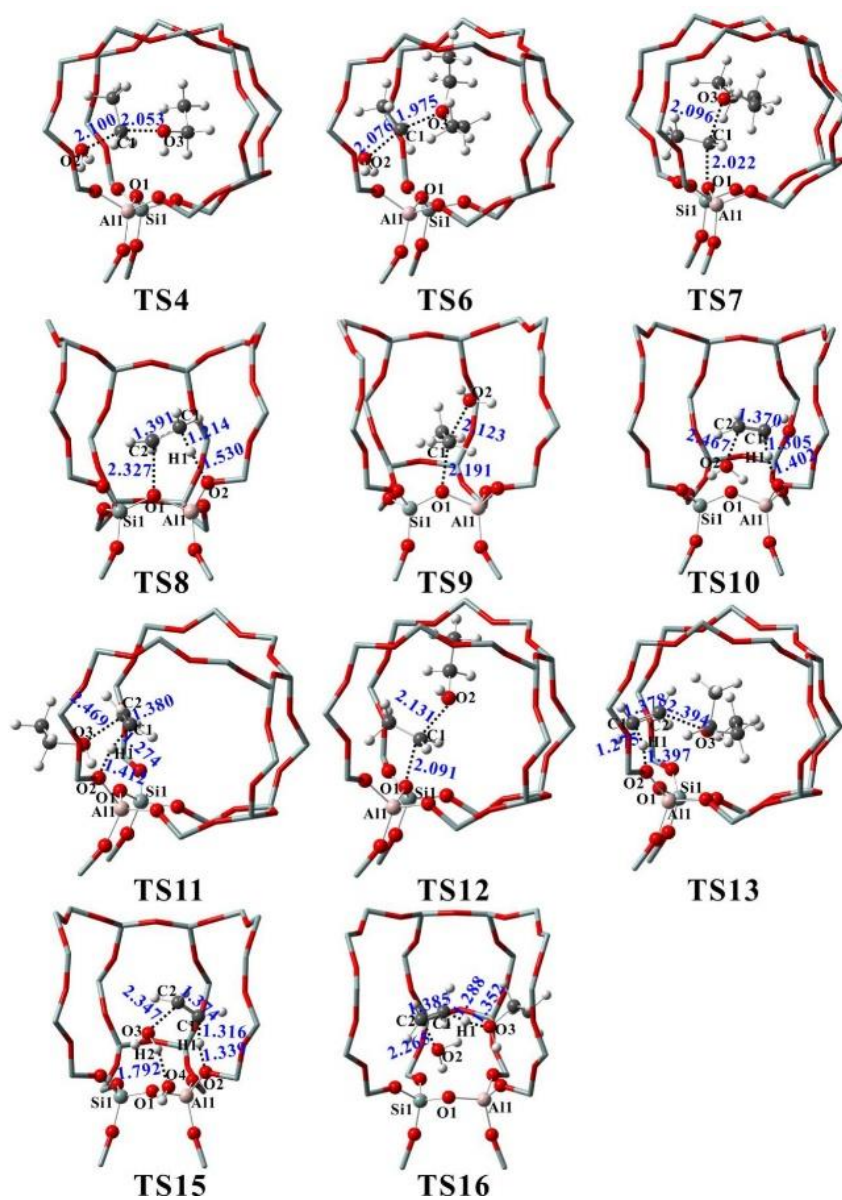

**Supplementary Figure 13.** The optimized transition states (TS) structures for ethene formation through various elementary steps shown in Figure 5. The main geometric parameters are labelled (in Å) for each structure. The XYZ coordinates for all the transition states in Supplementary Table 3.





**Supplementary Table 2.** Adsorption energy (ads, kJ mol<sup>-1</sup>), reaction energy (react, J mol<sup>-1</sup> K<sup>-1</sup>), and energy barrier for (act, kJ mol<sup>-1</sup>) the elementary steps (numbered as indicated in Figure 5).  $\Delta H$  represents the enthalpy;  $\Delta S$  represents the entropy;  $\Delta E$  represents the electronic energy;  $\Delta G$  represents the Gibbs free energy at 473 K; g represents gas stage.

| Elementary steps                                                   | $\Delta H_{\text{ads}}$ | $\Delta H_{\text{react}}$ | $\Delta H_{\text{act}}$ | $\Delta S_{\text{ads}}$ | $\Delta S_{\text{react}}$ | $\Delta S_{\text{act}}$ | $\Delta E_{\text{ads}}$ | $\Delta E_{\text{react}}$ | $\Delta E_{\text{act}}$ | $\Delta G_{\text{ads}}$ | $\Delta G_{\text{react}}$ | $\Delta G_{\text{act}}$ |
|--------------------------------------------------------------------|-------------------------|---------------------------|-------------------------|-------------------------|---------------------------|-------------------------|-------------------------|---------------------------|-------------------------|-------------------------|---------------------------|-------------------------|
| (1) ZeOH+EtOH <sub>(g)</sub> ↔ A                                   | -129.5                  |                           |                         | -184.3                  |                           |                         | -133.5                  |                           |                         | -42.3                   |                           |                         |
| (2) A+EtOH <sub>(g)</sub> ↔ B                                      | -139.0                  |                           |                         | -166.2                  |                           |                         | -129.4                  |                           |                         | -60.4                   |                           |                         |
| (3) B ↔ C                                                          | 43.4                    |                           |                         | -6.1                    |                           |                         | 27.0                    |                           |                         | 46.3                    |                           |                         |
| (4) C $\xrightleftharpoons{\text{TS4}}$ DEE.H <sub>2</sub> O*      |                         | 42.3                      | 118.3                   |                         | -15.6                     | -22.7                   |                         | 39.4                      | 119.2                   |                         | 49.6                      | 129.0                   |
| (5) DEE*+EtOH <sub>(g)</sub> ↔ D                                   | -73.4                   |                           |                         | -194.1                  |                           |                         | -85.0                   |                           |                         | 18.4                    |                           |                         |
| (6) D $\xrightleftharpoons{\text{TS6}}$ TEO.H <sub>2</sub> O*      |                         | 39.4                      | 94.9                    |                         | 21.8                      | 1.6                     |                         | 38.6                      | 97.7                    |                         | 29.1                      | 94.1                    |
| (7) TEO* $\xrightleftharpoons{\text{TS7}}$ Ethoxy.DEE*             |                         | 16.3                      | 73.6                    |                         | 2.7                       | -16.9                   |                         | 14.1                      | 78.1                    |                         | 15.0                      | 81.7                    |
| (8) Ethoxy $\xrightleftharpoons{\text{TS8}}$ Ethene*               |                         | 48.9                      | 108.7                   |                         | 35.2                      | 2.4                     |                         | 56.0                      | 127.6                   |                         | 32.3                      | 107.6                   |
| (9) A $\xrightleftharpoons{\text{TS9}}$ Ethoxy.H <sub>2</sub> O*   |                         | 86.9                      | 153.9                   |                         | 22                        | 16                      |                         | 87                        | 161.3                   |                         | 76.5                      | 146.3                   |
| (10) A $\xrightleftharpoons{\text{TS10}}$ Ethene.H <sub>2</sub> O* |                         | 97.1                      | 177.6                   |                         | 60.5                      | 12.2                    |                         | 101.2                     | 197.9                   |                         | 68.5                      | 171.8                   |

|      |                                                                           |        |       |        |      |        |       |       |       |
|------|---------------------------------------------------------------------------|--------|-------|--------|------|--------|-------|-------|-------|
| (11) | $\text{DEE}^* \xleftrightarrow{\text{TS11}} \text{Ethene.EtOH}^*$         | 98     | 145.3 | 44.1   | 19.5 | 96.6   | 158.9 | 77.2  | 136.1 |
| (12) | $\text{DEE}^* \xleftrightarrow{\text{TS12}} \text{Ethoxy.EtOH}^*$         | 88     | 154.6 | 21.9   | -2.7 | 83.7   | 156.4 | 77.7  | 155.9 |
| (13) | $\text{TEO}^* \xleftrightarrow{\text{TS13}} \text{Ethene.DEE}^*$          | 79.9   | 130.9 | 64.7   | 6.8  | 89.3   | 153.4 | 49.3  | 127.7 |
| (14) | $\text{A} + \text{H}_2\text{O}_{(\text{g})} \leftrightarrow \text{E}$     | -112.1 |       | -140.9 |      | -118.6 |       | -45.5 |       |
| (15) | $\text{E} \xleftrightarrow{\text{TS15}} \text{Ethene.2H}_2\text{O}^*$     | 145.6  | 194.4 | 54.1   | 20.4 | 148.9  | 212.5 | 120.1 | 184.8 |
| (16) | $\text{B} \xleftrightarrow{\text{TS16}} \text{Ethene.H}_2\text{O.EtOH}^*$ | 57.3   | 151.9 | 66.1   | 14.1 | 64     | 167.6 | 26    | 145.2 |

---

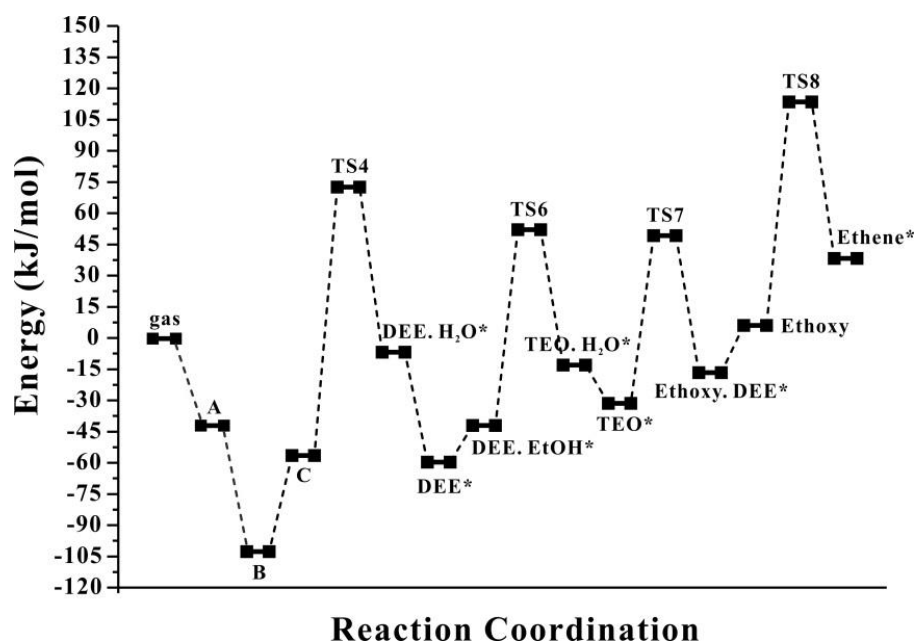

**Supplementary Figure 14.** The reaction Gibbs free energy profile of ethene formation through route 1 over H-ZSM-5 zeolite at 473 K.

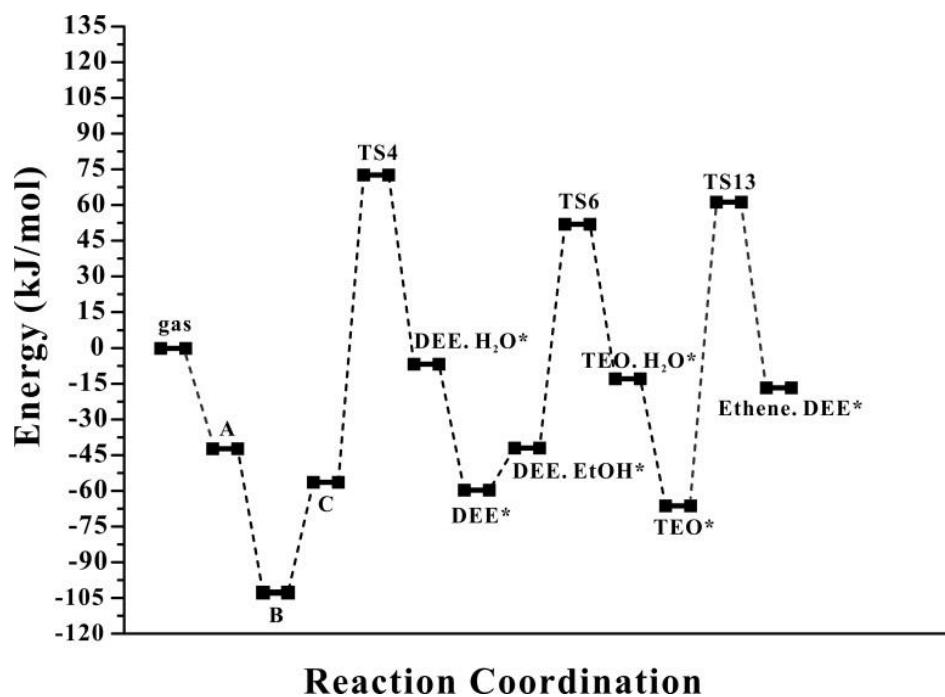

**Supplementary Figure 15.** The reaction Gibbs free energy profile of ethene formation through route 2 over H-ZSM-5 zeolite at 473 K.

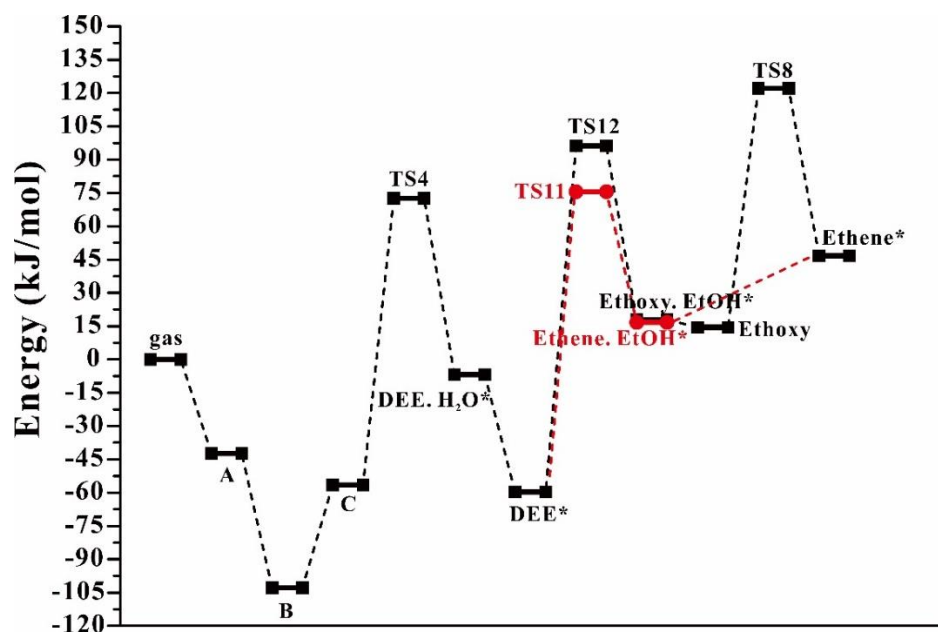

### Reaction Coordination

Supplementary Figure 16. The reaction Gibbs free energy profile of ethene formation through route 3 (■) and route 4 (●) over H-ZSM-5 zeolite at 473 K.

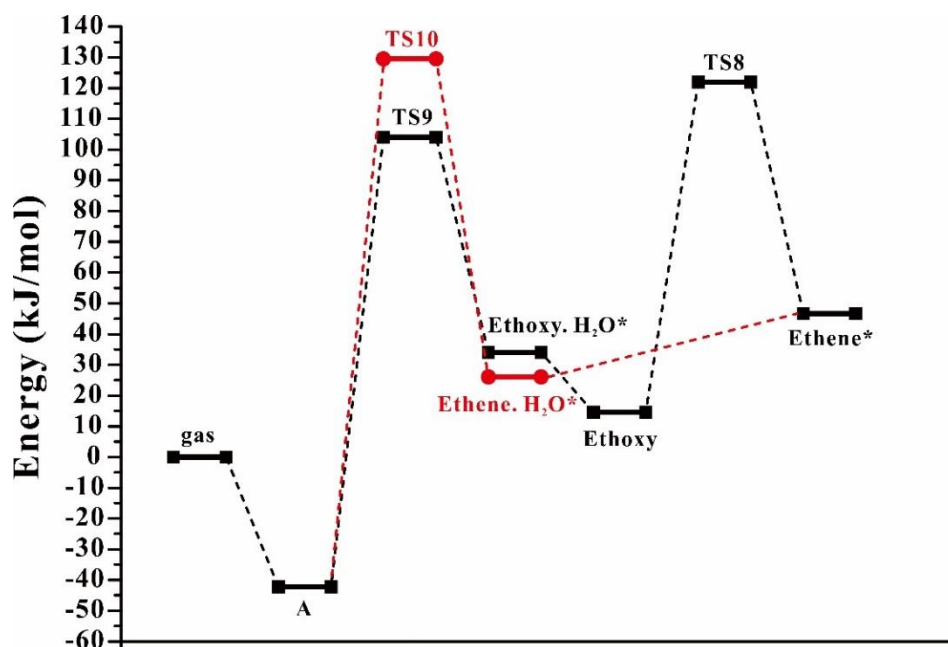

### Reaction Coordination

Supplementary Figure 17. The reaction Gibbs free energy profile of ethene formation through route 5 (■) and route 6 (●) over H-ZSM-5 zeolite at 473 K.

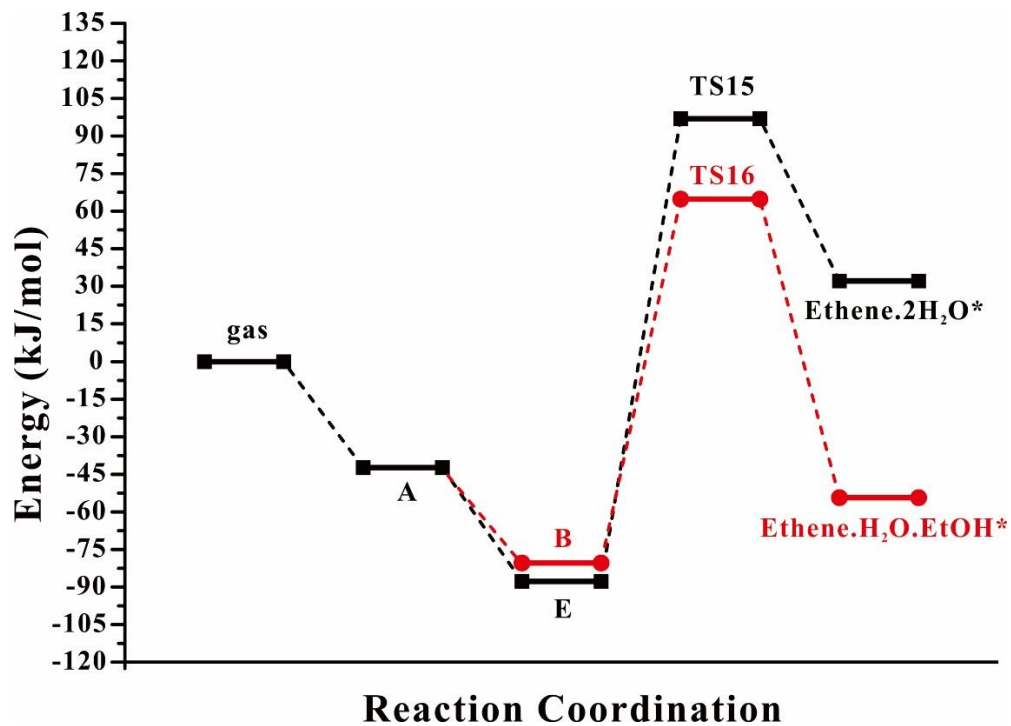

**Supplementary Figure 18.** The reaction Gibbs free energy profile of ethene formation through route 7 (■) and route 8 (●) over H-ZSM-5 zeolite at 473 K.

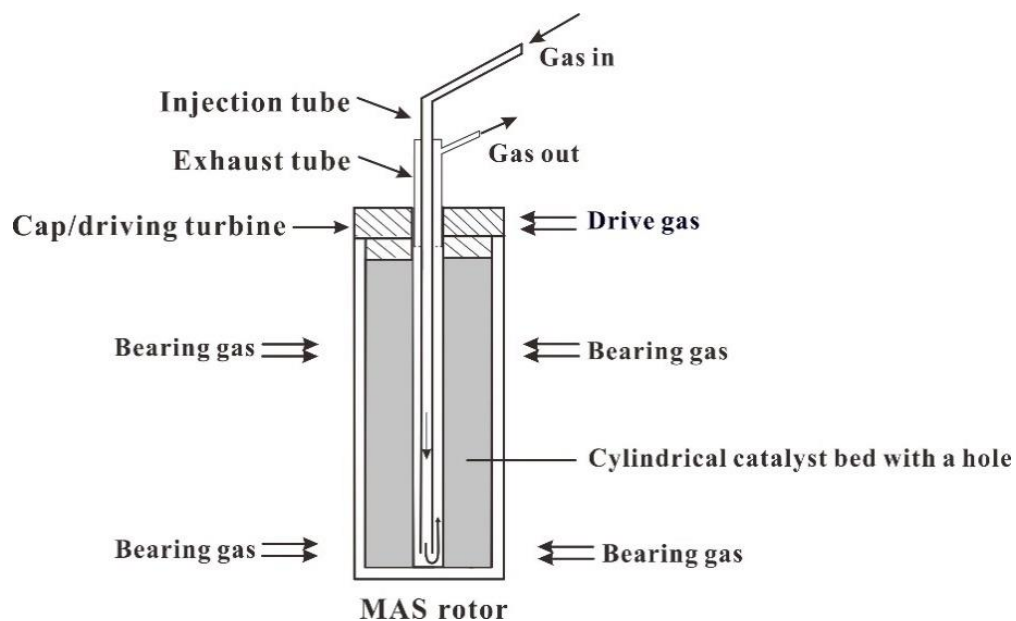

**Supplementary Figure 19.** Schematic of the MAS rotor used as the reactor for in situ NMR.

### Supplementary Table 3

#### TS4

|    |             |             |             |
|----|-------------|-------------|-------------|
| O  | -4.30584000 | 3.33432900  | 1.76286100  |
| O  | -3.24770100 | 2.48707800  | 3.94308000  |
| O  | -7.35632200 | -1.90032300 | 1.87531000  |
| O  | -7.72476200 | 0.63640200  | 1.88953400  |
| O  | -6.70476800 | -0.49377400 | 3.96482700  |
| O  | -4.21754200 | -3.37877600 | 3.80618400  |
| O  | -3.11397500 | -1.39307300 | 4.99526200  |
| O  | -1.23068000 | -5.69114100 | 3.88770400  |
| O  | -4.21640600 | -3.38962400 | -3.78726200 |
| O  | -3.11212300 | -1.40777100 | -4.98179600 |
| O  | -1.22934000 | -5.70238100 | -3.86098200 |
| Si | -1.42304100 | -7.26580300 | 3.81716000  |
| Si | -1.42172700 | -7.27683300 | -3.78593400 |
| O  | 2.66297700  | -5.00240000 | 2.44867900  |
| O  | -2.97182200 | -7.63094700 | 3.91412200  |
| O  | -0.92064800 | -7.81546400 | 2.40834000  |
| O  | 2.66381900  | -5.00946700 | -2.42261500 |
| O  | -2.97047500 | -7.64225500 | -3.88237100 |
| O  | -0.91982200 | -7.82240200 | -2.37535300 |
| Si | 2.77441400  | -6.30406400 | 1.54518600  |
| Si | 0.35705000  | -8.24899200 | 1.55379200  |
| Si | 2.77494400  | -6.30850500 | -1.51531100 |
| Si | 0.35758100  | -8.25344700 | -1.51910600 |
| O  | 1.58048800  | -7.29232600 | 1.89861600  |
| O  | 4.14184000  | -7.04563400 | 1.77930000  |
| O  | 2.69781500  | -5.82861600 | 0.01418400  |
| O  | -0.06725800 | -8.13414700 | 0.01705000  |
| O  | 1.58113900  | -7.29778600 | -1.86628200 |
| O  | 4.14245100  | -7.05074800 | -1.74679700 |
| O  | -4.30526200 | 3.32910900  | -1.76336600 |
| O  | -3.24629700 | 2.47569600  | -3.94074600 |
| O  | -7.35565400 | -1.90574200 | -1.86174300 |
| O  | -7.72417400 | 0.63094800  | -1.88340300 |
| O  | -6.70345300 | -0.50526400 | -3.95507200 |
| Si | -3.67016500 | -0.48296700 | -6.14257900 |
| Si | -3.08761000 | 2.45383400  | -5.51523800 |
| Si | -6.71863000 | -0.56663200 | -5.52138600 |
| O  | -2.99794100 | 0.95946100  | -6.04785900 |
| O  | -5.25097600 | -0.35140700 | -6.07024800 |
| O  | -7.27097300 | -1.96423200 | -6.03045300 |
| Si | -3.08951400 | 2.46985100  | 5.51764800  |

|    |             |             |             |
|----|-------------|-------------|-------------|
| Si | -6.72055600 | -0.55055400 | 5.53130600  |
| Si | -3.67230700 | -0.46525800 | 6.15340300  |
| O  | -3.00008500 | 0.97701300  | 6.05464000  |
| O  | -7.27312600 | -1.94668900 | 6.04423100  |
| O  | -5.25306200 | -0.33383300 | 6.08003900  |
| Si | -5.67325100 | 4.07576900  | 1.52865100  |
| Si | -8.09059900 | 2.13087300  | 1.53726500  |
| Si | -5.67270400 | 4.07137200  | -1.53182600 |
| Si | -8.09006700 | 2.12641800  | -1.53562300 |
| O  | -6.86715700 | 3.08754100  | 1.88210200  |
| O  | -5.78466800 | 5.37747000  | 2.43215700  |
| O  | -5.74983400 | 4.55125400  | -0.00233600 |
| O  | -8.51491200 | 2.24571700  | 0.00053600  |
| O  | -6.86651200 | 3.08207600  | -1.88279900 |
| O  | -5.78383300 | 5.37040100  | -2.43912900 |
| Si | -7.34848400 | -3.44717100 | 1.55121600  |
| Si | -7.34793900 | -3.45164100 | -1.53309500 |
| O  | -6.21085400 | -4.18890300 | 2.37037200  |
| O  | -7.06806200 | -3.68415200 | 0.00938400  |
| O  | -6.21003300 | -4.19575900 | -2.34972700 |
| Si | -5.41880600 | -4.39445800 | 3.73229200  |
| O  | -4.86227000 | -5.87923000 | 3.77195300  |
| O  | -6.40087200 | -4.16166500 | 4.95120200  |
| Si | -7.27077800 | -3.52843600 | 6.10823000  |
| Si | -4.41618200 | -7.23906200 | 4.44810400  |
| Si | -5.41747200 | -4.40531400 | -3.71077600 |
| O  | -4.86096700 | -5.89013300 | -3.74594500 |
| O  | -6.39916900 | -4.17599300 | -4.93069100 |
| Si | -7.26867200 | -3.54613200 | -6.08985800 |
| Si | -4.41465100 | -7.25192200 | -4.41798600 |
| O  | 5.67985200  | -2.97294200 | 3.76955800  |
| O  | 5.68115000  | -2.98384700 | -3.74833400 |
| O  | 6.60147200  | 0.54495500  | 3.88001500  |
| O  | 6.60281100  | 0.53371600  | -3.86867700 |
| O  | 5.60776000  | 3.61893800  | 1.88348200  |
| O  | 5.60841100  | 3.61347300  | -1.88141500 |
| O  | 2.59171900  | 5.84031500  | 1.80013600  |
| O  | 2.59234200  | 5.83508300  | -1.80555900 |
| O  | -1.38445000 | 5.74044300  | 2.35679900  |
| O  | -1.38363800 | 5.73359700  | -2.36329600 |
| Si | -6.14039200 | 6.01543100  | 3.84597700  |
| Si | -6.13906000 | 6.00426300  | -3.85491500 |
| Si | -1.42698500 | 6.56036400  | 3.71710100  |
| Si | -1.42570000 | 6.54956700  | -3.72599300 |



|    |             |             |             |
|----|-------------|-------------|-------------|
| Si | 6.81847800  | 4.58656900  | 1.53008700  |
| Si | 6.81900600  | 4.58212700  | -1.53040900 |
| Si | 2.83689200  | 7.37024700  | 1.52196000  |
| Si | 2.83741800  | 7.36581500  | -1.53173500 |
| O  | -5.36406100 | 7.40634200  | 3.96949300  |
| O  | -5.36268700 | 7.39480700  | -3.98219700 |
| O  | -0.18858600 | 7.53031700  | 3.79110800  |
| O  | -2.76780000 | 7.40692500  | 3.75304100  |
| O  | -0.18727600 | 7.51930200  | -3.80238500 |
| O  | -2.76650100 | 7.39601700  | -3.76484900 |
| Si | -4.00973100 | 8.12120100  | 4.42589200  |
| Si | -4.00819800 | 8.10833900  | -4.44019800 |
| O  | 4.34810700  | 7.73911200  | 1.82948500  |
| O  | 1.86987800  | 8.30446800  | 2.39933800  |
| O  | 2.52518600  | 7.70889900  | -0.00548500 |
| O  | 4.34874500  | 7.73379000  | -1.83981000 |
| O  | 1.87071000  | 8.29749000  | -2.41215500 |
| Si | 1.04841600  | 8.49740100  | 3.74871800  |
| Si | 1.04971000  | 8.48650500  | -3.76237100 |
| O  | 6.36974800  | 6.07655900  | 1.76064700  |
| O  | 8.06896100  | 4.21479600  | 2.43624400  |
| O  | 7.27084200  | 4.41206200  | 0.00011600  |
| O  | 6.37035600  | 6.07144100  | -1.76544800 |
| O  | 8.06980200  | 4.20773000  | -2.43505200 |
| Si | 5.80782100  | 7.41984900  | 2.37610200  |
| Si | 5.80864200  | 7.41294100  | -2.38499300 |
| Si | 8.61917500  | 3.73962000  | 3.85182800  |
| Si | 8.62050900  | 3.72845000  | -3.84906300 |
| Si | 8.06893200  | 0.76178300  | 4.42875300  |
| Si | 8.07046000  | 0.74894800  | -4.41753700 |
| O  | 8.62145400  | 2.15790100  | 3.91582300  |
| O  | 8.62280500  | 2.14655100  | -3.90846700 |
| O  | 9.02090400  | -0.36940800 | 3.81405900  |
| O  | 9.02221900  | -0.38045300 | -3.79923300 |
| Si | 9.49612700  | -1.88254200 | 3.76523700  |
| Si | 9.49742900  | -1.89344000 | -3.74585600 |
| O  | 8.25906500  | -2.84955000 | 3.80762700  |
| O  | 8.26037400  | -2.86056400 | -3.78586900 |
| Si | 7.02066400  | -3.81950300 | 3.73361800  |
| Si | 7.02195300  | -3.83029900 | -3.70947500 |
| O  | 7.06319800  | -4.63942200 | 2.37331200  |
| O  | 7.06401400  | -4.64626800 | -2.34678100 |
| Si | 5.34210900  | -7.86745000 | 2.39819900  |
| Si | 5.34293200  | -7.87435500 | -2.36289500 |

|    |             |             |             |
|----|-------------|-------------|-------------|
| Si | 7.55974700  | -5.90563500 | 1.55733500  |
| Si | 7.56028000  | -5.91011000 | -1.52696100 |
| O  | 6.71610600  | -7.19513600 | 1.95106000  |
| O  | 6.71677500  | -7.20074900 | -1.91723400 |
| O  | 7.38699900  | -5.58581400 | 0.01464100  |
| H  | -5.31109700 | -8.33783100 | -3.99598300 |
| H  | -5.31248400 | -8.32618900 | 4.02894300  |
| H  | -8.66876100 | -3.96812100 | 5.99324900  |
| H  | -8.67444400 | -3.96780000 | 1.91402000  |
| H  | -8.67379000 | -3.97332600 | -1.89487400 |
| H  | -8.66669600 | -3.98547900 | -5.97408400 |
| H  | -6.75996400 | -3.98886300 | -7.39603900 |
| H  | -6.76252100 | -3.96737600 | 7.41586500  |
| H  | -7.59446500 | 0.48798700  | 6.09565200  |
| H  | -7.59242000 | 0.47026200  | -6.08904100 |
| H  | -9.26661600 | 2.52990800  | 2.32382600  |
| H  | -9.26582000 | 2.52316100  | -2.32372700 |
| H  | -7.57823100 | 6.31594900  | 3.90258900  |
| H  | -7.57688200 | 6.30461300  | -3.91289300 |
| H  | -5.72790300 | 5.09107100  | -4.93098700 |
| H  | -4.09253600 | 9.50224000  | 3.92912000  |
| H  | -3.86282900 | 8.10511800  | 5.88844500  |
| H  | -4.09117800 | 9.49081300  | -3.94746400 |
| H  | -3.86079500 | 8.08801400  | -5.90264700 |
| H  | -5.72960700 | 5.10536800  | 4.92483700  |
| H  | -4.24079000 | 3.11542400  | -6.14244900 |
| H  | -1.84159600 | 3.11020700  | -5.93655900 |
| H  | -4.24288200 | 3.13330600  | 6.14254100  |
| H  | -1.84361800 | 3.12737400  | 5.93749800  |
| H  | -1.40227900 | 5.62536500  | 4.85115000  |
| H  | -1.40060100 | 5.61128300  | -4.85731100 |
| H  | 1.91797800  | 8.22844400  | 4.90302500  |
| H  | 0.60819100  | 9.89920500  | 3.79395300  |
| H  | 0.60950600  | 9.88817300  | -3.81182600 |
| H  | 1.91967300  | 8.21420100  | -4.91559300 |
| H  | 2.12828100  | 4.50572100  | 3.85260300  |
| H  | 2.12961100  | 4.49454200  | -3.85430400 |
| H  | 5.75669200  | 7.28590000  | -3.84857000 |
| H  | 6.67379600  | 8.52833000  | -1.97472500 |
| H  | 6.67311500  | 8.53404300  | 1.96290100  |
| H  | 5.75536300  | 7.29705200  | 3.84002500  |
| H  | 7.80984000  | 4.32875400  | 4.92830400  |
| H  | 10.01716000 | 4.17930300  | 3.96681200  |
| H  | 10.01853000 | 4.16779700  | -3.96483600 |

|    |             |             |             |
|----|-------------|-------------|-------------|
| H  | 7.81154200  | 4.31445500  | -4.92752100 |
| H  | 4.50307000  | 1.53688800  | 4.88024000  |
| H  | 8.05419000  | 0.70847400  | 5.89771400  |
| H  | 10.36566200 | -2.15143500 | 4.91958100  |
| H  | 10.25484400 | -2.06068000 | 2.51883400  |
| H  | 4.50475600  | 1.52274100  | -4.87250400 |
| H  | 4.58685900  | -2.29185200 | -5.88613000 |
| H  | 10.36735700 | -2.16568000 | -4.89911300 |
| H  | 10.25571000 | -2.06795900 | -2.49868100 |
| H  | 4.58482000  | -2.27474600 | 5.90496200  |
| H  | 8.05622400  | 0.69137800  | -5.88633800 |
| H  | 7.04704900  | -4.76858600 | -4.84079500 |
| H  | 8.96718300  | -6.20970800 | -1.82987800 |
| H  | 8.96654700  | -6.20435300 | 1.86160600  |
| H  | 7.04537500  | -4.75450200 | 4.86766600  |
| H  | 5.35771900  | -9.24886400 | 1.89585900  |
| H  | 5.35836600  | -9.25430900 | -1.85654600 |
| H  | 2.71804100  | -5.27449800 | 4.94135500  |
| H  | 2.71974500  | -5.28879400 | -4.91446900 |
| H  | 0.69771200  | -9.64083500 | 1.88184300  |
| H  | 0.69835400  | -9.64624000 | -1.84300100 |
| H  | -0.68720600 | -7.94535800 | 4.89310000  |
| H  | -0.68551800 | -7.95950600 | -4.85964200 |
| H  | -0.77864900 | -4.29806200 | 5.90344900  |
| H  | -0.77661300 | -4.31515500 | -5.88060500 |
| H  | -4.40437200 | -7.08915900 | 5.91039200  |
| H  | -4.40233300 | -7.10626400 | -5.88069900 |
| H  | -3.27196500 | -1.01942300 | 7.45461500  |
| H  | -3.26938500 | -1.04103000 | -7.44213500 |
| H  | 5.21019500  | -7.90227900 | -3.82662500 |
| H  | 5.20886900  | -7.89112400 | 3.86195800  |
| Al | -3.47617200 | -0.37741500 | -1.51229200 |
| Si | -2.88374500 | -2.37167600 | 3.65022400  |
| Si | -3.50485700 | -0.40726200 | 1.50631100  |
| Si | -2.97360600 | 2.44252900  | 2.28544500  |
| Si | -6.57981000 | -0.49232700 | 2.28803100  |
| Si | -2.94684200 | 2.43060800  | -2.27359200 |
| Si | -2.88763700 | -2.37529400 | -3.61515000 |
| Si | -6.57048800 | -0.48855300 | -2.28029000 |
| O  | -2.96341200 | -1.76651600 | 2.18625800  |
| O  | -2.80596300 | 0.85776800  | 2.21565300  |
| O  | -2.89981500 | -0.47907600 | 0.07358200  |
| O  | -5.11497400 | -0.28425000 | 1.67185700  |
| O  | -5.15998000 | -0.16132800 | -1.67176000 |

|    |             |             |             |
|----|-------------|-------------|-------------|
| O  | -2.93192300 | -1.88526600 | -2.12035900 |
| O  | -2.51124700 | 0.90978900  | -2.13025900 |
| O  | -1.43549900 | -2.98065100 | -3.81603200 |
| O  | -1.44723500 | -3.00731000 | 3.76861400  |
| O  | 0.78235600  | -4.05965900 | -3.93974500 |
| O  | 0.79050300  | -4.02942400 | 3.99334400  |
| O  | 2.98491400  | -2.89314200 | -4.07026100 |
| O  | 4.16751700  | -0.71164900 | -4.02538500 |
| O  | 4.49193700  | 1.13512600  | -2.34212900 |
| O  | 2.96518100  | 3.17755100  | -1.77730300 |
| O  | 0.55835900  | 3.92759300  | -2.12969600 |
| O  | -1.80102500 | 3.22931200  | -1.47130700 |
| O  | -1.75408200 | 3.14485900  | 1.52748700  |
| O  | 0.56439500  | 3.90929700  | 2.15682800  |
| O  | 2.97854900  | 3.19693500  | 1.78079600  |
| O  | 2.99107400  | -2.87945700 | 4.08421900  |
| O  | 4.16569700  | -0.69498300 | 4.04454800  |
| O  | 4.48631500  | 1.14587900  | 2.35259400  |
| O  | 4.54591100  | 2.01822700  | 0.00106100  |
| O  | -0.45210800 | 4.99569300  | 0.02187200  |
| Si | -0.69539100 | -4.21868100 | -4.46799400 |
| Si | 2.33184900  | -4.33373100 | -3.92792600 |
| Si | -0.69099000 | -4.20938900 | 4.48576100  |
| Si | 2.33757900  | -4.31919600 | 3.95076300  |
| Si | 4.35713700  | -2.19723800 | 4.50773100  |
| Si | 4.35553800  | -2.21389800 | -4.48972200 |
| Si | 4.90610000  | 0.67170500  | -3.80882600 |
| Si | 4.90587200  | 0.68551800  | 3.81849800  |
| Si | 4.37889100  | 2.48184000  | -1.51234600 |
| Si | 4.38468000  | 2.48707100  | 1.51131400  |
| Si | 2.08025100  | 4.34202500  | 2.44675000  |
| Si | 2.07547100  | 4.33168400  | -2.44498300 |
| Si | -0.79213000 | 4.42194100  | 1.47494700  |
| Si | -0.79426200 | 4.45036400  | -1.44511600 |
| H  | 0.95761800  | -3.33419800 | -1.16542900 |
| C  | 1.07838000  | -2.35078400 | -0.70338300 |
| H  | 1.51273500  | -2.46311700 | 0.29032300  |
| H  | 1.76196300  | -1.78197400 | -1.33952000 |
| C  | -0.23453800 | -1.66660900 | -0.69357800 |
| O  | 0.25825600  | 0.27233500  | -1.15522500 |
| C  | 0.37786900  | 1.08624400  | 0.02734700  |
| H  | 0.73489000  | 2.07071800  | -0.28923800 |
| H  | -0.60781000 | 1.19849300  | 0.48683200  |
| C  | 1.36296900  | 0.47473500  | 0.99947200  |

|   |             |             |             |
|---|-------------|-------------|-------------|
| H | 2.32388300  | 0.27708600  | 0.51654400  |
| H | 1.52803900  | 1.18213300  | 1.81227300  |
| H | 0.99650500  | -0.45381300 | 1.44424500  |
| O | -1.50091600 | -3.25990700 | -0.17658900 |
| H | -0.68186000 | -1.22671600 | 0.17907100  |
| H | -0.81046600 | -1.64630200 | -1.60364400 |
| H | -2.19128700 | -3.00320200 | -0.81936100 |
| H | -1.87558900 | -3.00441900 | 0.67941800  |
| H | -0.54627300 | 0.57347700  | -1.62221900 |

## TS6

|    |             |             |             |
|----|-------------|-------------|-------------|
| O  | -4.33751700 | 3.33895700  | 1.76370900  |
| O  | -3.27568800 | 2.49305800  | 3.94265700  |
| O  | -7.36638600 | -1.90837700 | 1.86918400  |
| O  | -7.74527900 | 0.62678600  | 1.88695300  |
| O  | -6.72043600 | -0.50204700 | 3.96058800  |
| O  | -4.22135500 | -3.37655000 | 3.79772800  |
| O  | -3.12586900 | -1.38796200 | 4.98945400  |
| O  | -1.22497900 | -5.67669200 | 3.87577900  |
| O  | -4.22089800 | -3.37688400 | -3.79572500 |
| O  | -3.12490800 | -1.38884300 | -4.98761400 |
| O  | -1.22433200 | -5.67720500 | -3.87291400 |
| Si | -1.41085400 | -7.25203600 | 3.80307300  |
| Si | -1.41021900 | -7.25253700 | -3.80002900 |
| O  | 2.66566800  | -4.96991600 | 2.43736000  |
| O  | -2.95810800 | -7.62369500 | 3.89966800  |
| O  | -0.90633400 | -7.79767000 | 2.39344800  |
| O  | 2.66607400  | -4.97023800 | -2.43393900 |
| O  | -2.95745900 | -7.62420800 | -3.89683300 |
| O  | -0.90593600 | -7.79798600 | -2.39025000 |
| Si | 2.78238400  | -6.26986000 | 1.53205500  |
| Si | 0.37305800  | -8.22474500 | 1.53818600  |
| Si | 2.78264100  | -6.27006200 | -1.52844400 |
| Si | 0.37331400  | -8.22494600 | -1.53471500 |
| O  | 1.59257500  | -7.26352200 | 1.88422400  |
| O  | 4.15287600  | -7.00610900 | 1.76502000  |
| O  | 2.70368000  | -5.79261200 | 0.00172000  |
| O  | -0.05186600 | -8.10952400 | 0.00164200  |
| O  | 1.59289000  | -7.26377000 | -1.88067800 |
| O  | 4.15317400  | -7.00634000 | -1.76108100 |
| O  | -4.33725600 | 3.33861800  | -1.76252400 |
| O  | -3.27498900 | 2.49259200  | -3.94117800 |
| O  | -7.36605300 | -1.90862100 | -1.86787300 |

|    |             |             |             |
|----|-------------|-------------|-------------|
| O  | -7.74502800 | 0.62655500  | -1.88598700 |
| O  | -6.71982900 | -0.50257000 | -3.95932000 |
| Si | -3.68686800 | -0.46474300 | -6.14706600 |
| Si | -3.11636400 | 2.47356500  | -5.51571300 |
| Si | -6.73490300 | -0.56183200 | -5.52571600 |
| O  | -3.02058800 | 0.98031100  | -6.05041000 |
| O  | -5.26820100 | -0.33980100 | -6.07441100 |
| O  | -7.28153000 | -1.96099100 | -6.03666800 |
| Si | -3.11728200 | 2.47430400  | 5.51718500  |
| Si | -6.73584100 | -0.56106000 | 5.52698800  |
| Si | -3.68791100 | -0.46406000 | 6.14893000  |
| O  | -3.02164800 | 0.98110500  | 6.05210200  |
| O  | -7.28260300 | -1.96016900 | 6.03803000  |
| O  | -5.26920000 | -0.33905000 | 6.07588900  |
| Si | -5.70799700 | 4.07507600  | 1.53064700  |
| Si | -8.11730500 | 2.12022200  | 1.53678500  |
| Si | -5.70772300 | 4.07491600  | -1.52983400 |
| Si | -8.11704900 | 2.12002200  | -1.53610600 |
| O  | -6.89778500 | 3.08144600  | 1.88283700  |
| O  | -5.82469200 | 5.37505600  | 2.43596400  |
| O  | -5.78668600 | 4.55235900  | 0.00032700  |
| O  | -8.54223600 | 2.23544400  | 0.00025500  |
| O  | -6.89747700 | 3.08119400  | -1.88206800 |
| O  | -5.82429200 | 5.37473200  | -2.43532700 |
| Si | -7.35220400 | -3.45472900 | 1.54294900  |
| Si | -7.35193400 | -3.45492900 | -1.54136600 |
| O  | -6.21144800 | -4.19289900 | 2.36097500  |
| O  | -7.07095400 | -3.68841800 | 0.00076400  |
| O  | -6.21104800 | -4.19321900 | -2.35912900 |
| Si | -5.41842900 | -4.39707100 | 3.72253700  |
| O  | -4.85577400 | -5.87959000 | 3.76009300  |
| O  | -6.40132900 | -4.17001400 | 4.94185700  |
| Si | -7.27372800 | -3.54198000 | 6.09983900  |
| Si | -4.40402000 | -7.23850600 | 4.43432100  |
| Si | -5.41776000 | -4.39762200 | -3.72053900 |
| O  | -4.85514400 | -5.88008300 | -3.75781300 |
| O  | -6.40051100 | -4.17066000 | -4.94004600 |
| Si | -7.27271300 | -3.54278600 | -6.09826300 |
| Si | -4.40328100 | -7.23908900 | -4.43177800 |
| O  | 5.67427900  | -2.92987000 | 3.76077700  |
| O  | 5.67490400  | -2.93036600 | -3.75712500 |
| O  | 6.58140100  | 0.59164100  | 3.87602000  |
| O  | 6.58204700  | 0.59113000  | -3.87268000 |
| O  | 5.57483600  | 3.66426000  | 1.88383300  |

|    |             |             |             |
|----|-------------|-------------|-------------|
| O  | 5.57515000  | 3.66400900  | -1.88106700 |
| O  | 2.54965600  | 5.87329900  | 1.80383400  |
| O  | 2.54995600  | 5.87306000  | -1.80186500 |
| O  | -1.42601500 | 5.75626700  | 2.36071400  |
| O  | -1.42562500 | 5.75595800  | -2.35938600 |
| Si | -6.18290700 | 6.00958800  | 3.85069800  |
| Si | -6.18226400 | 6.00908300  | -3.85020200 |
| Si | -1.47179900 | 6.57412300  | 3.72215400  |
| Si | -1.47118000 | 6.57363100  | -3.72094800 |
| Si | 6.78152100  | 4.63736200  | 1.53167000  |
| Si | 6.78177500  | 4.63715900  | -1.52883000 |
| Si | 2.78849400  | 7.40461200  | 1.52775300  |
| Si | 2.78874700  | 7.40440800  | -1.52594500 |
| O  | -5.41230400 | 7.40351400  | 3.97607000  |
| O  | -5.41164200 | 7.40299000  | -3.97562900 |
| O  | -0.23740300 | 7.54906800  | 3.79739200  |
| O  | -2.81609000 | 7.41509900  | 3.75938600  |
| O  | -0.23677000 | 7.54856700  | -3.79610800 |
| O  | -2.81546200 | 7.41460000  | -3.75851200 |
| Si | -4.06089000 | 8.12331800  | 4.43333700  |
| Si | -4.06014800 | 8.12273400  | -4.43276400 |
| O  | 4.29820500  | 7.77927800  | 1.83565300  |
| O  | 1.81772100  | 8.33362500  | 2.40651000  |
| O  | 2.47524900  | 7.74409100  | 0.00080700  |
| O  | 4.29851400  | 7.77903700  | -1.83364500 |
| O  | 1.81812300  | 8.33330800  | -2.40498800 |
| Si | 0.99559800  | 8.52130200  | 3.75623000  |
| Si | 0.99622300  | 8.52080500  | -3.75486700 |
| O  | 6.32667500  | 6.12516900  | 1.76433300  |
| O  | 8.03361300  | 4.26949300  | 2.43719900  |
| O  | 7.23445400  | 4.46683800  | 0.00141800  |
| O  | 6.32696800  | 6.12493300  | -1.76176600 |
| O  | 8.03401900  | 4.26917200  | -2.43410200 |
| Si | 5.75927500  | 7.46527900  | 2.38169700  |
| Si | 5.75966900  | 7.46496300  | -2.37940300 |
| Si | 8.58591500  | 3.79463000  | 3.85207500  |
| Si | 8.58656100  | 3.79412400  | -3.84882400 |
| Si | 8.04800700  | 0.81375500  | 4.42492600  |
| Si | 8.04874400  | 0.81316900  | -4.42137300 |
| O  | 8.59472000  | 2.21284700  | 3.91388000  |
| O  | 8.59537200  | 2.21233100  | -3.91041800 |
| O  | 9.00457600  | -0.31265000 | 3.80858100  |
| O  | 9.00520900  | -0.31315300 | -3.80471900 |
| Si | 9.48602700  | -1.82374400 | 3.75762200  |

|    |             |             |             |
|----|-------------|-------------|-------------|
| Si | 9.48665600  | -1.82424000 | -3.75347900 |
| O  | 8.25296500  | -2.79590100 | 3.79878500  |
| O  | 8.25359500  | -2.79640100 | -3.79471900 |
| Si | 7.01856500  | -3.77084600 | 3.72354400  |
| Si | 7.01918800  | -3.77133600 | -3.71955700 |
| O  | 7.06435000  | -4.58870000 | 2.36210000  |
| O  | 7.06474200  | -4.58901100 | -2.35799800 |
| Si | 5.35658300  | -7.82382600 | 2.38267200  |
| Si | 5.35698000  | -7.82413800 | -2.37842600 |
| Si | 7.56603600  | -5.85172400 | 1.54432700  |
| Si | 7.56629200  | -5.85192800 | -1.53997200 |
| O  | 6.72775500  | -7.14523500 | 1.93634200  |
| O  | 6.72807800  | -7.14549300 | -1.93195700 |
| O  | 7.39182300  | -5.53048300 | 0.00209200  |
| H  | -5.29520400 | -8.32926700 | -4.01119800 |
| H  | -5.29587300 | -8.32873600 | 4.01373600  |
| H  | -8.66989900 | -3.98726400 | 5.98437400  |
| H  | -8.67597200 | -3.98132200 | 1.90515100  |
| H  | -8.67565800 | -3.98157400 | -1.90374800 |
| H  | -8.66890200 | -3.98805200 | -5.98297100 |
| H  | -6.76230900 | -3.98160800 | -7.40510000 |
| H  | -6.76354300 | -3.98063000 | 7.40681900  |
| H  | -7.61397000 | 0.47308800  | 6.09285000  |
| H  | -7.61301500 | 0.47223500  | -6.09185700 |
| H  | -9.29488300 | 2.51331800  | 2.32400300  |
| H  | -9.29450200 | 2.51300500  | -2.32355500 |
| H  | -7.62196800 | 6.30409800  | 3.90785500  |
| H  | -7.62131700 | 6.30358400  | -3.90763600 |
| H  | -5.76745000 | 5.09908300  | -4.92757500 |
| H  | -4.14943400 | 9.50469100  | 3.93848400  |
| H  | -3.91378300 | 8.10581800  | 5.89585200  |
| H  | -4.14877900 | 9.50417000  | -3.93810800 |
| H  | -3.91280300 | 8.10503900  | -5.89525200 |
| H  | -5.76827100 | 5.09973400  | 4.92826000  |
| H  | -4.27232100 | 3.13126200  | -6.14190300 |
| H  | -1.87310600 | 3.13564900  | -5.93623600 |
| H  | -4.27331500 | 3.13213300  | 6.14309900  |
| H  | -1.87406600 | 3.13637600  | 5.93783300  |
| H  | -1.44313100 | 5.63766500  | 4.85490500  |
| H  | -1.44232100 | 5.63702500  | -4.85356700 |
| H  | 1.86637300  | 8.25433400  | 4.91008500  |
| H  | 0.54960500  | 9.92121700  | 3.80344500  |
| H  | 0.55023900  | 9.92071600  | -3.80234300 |
| H  | 1.86719100  | 8.25368600  | -4.90854300 |



|    |             |             |             |
|----|-------------|-------------|-------------|
| H  | 2.09191800  | 4.53396700  | 3.85449300  |
| H  | 2.09256100  | 4.53346000  | -3.85242300 |
| H  | 5.70810500  | 7.33973500  | -3.84315000 |
| H  | 6.62025700  | 8.58334000  | -1.96766900 |
| H  | 6.61993000  | 8.58360000  | 1.96996100  |
| H  | 5.70746400  | 7.34024100  | 3.84545300  |
| H  | 7.77426100  | 4.37893300  | 4.92943700  |
| H  | 9.98208700  | 4.23991300  | 3.96754200  |
| H  | 9.98274800  | 4.23939000  | -3.96411500 |
| H  | 7.77508300  | 4.37828100  | -4.92639800 |
| H  | 4.47902300  | 1.57352900  | 4.87780500  |
| H  | 8.03362500  | 0.75835300  | 5.89381300  |
| H  | 10.35677200 | -2.09064700 | 4.91151500  |
| H  | 10.24535200 | -1.99702700 | 2.51090600  |
| H  | 4.47983700  | 1.57288600  | -4.87494800 |
| H  | 4.57756600  | -2.23992900 | -5.89386200 |
| H  | 10.35758900 | -2.09129600 | -4.90719000 |
| H  | 10.24577100 | -1.99735900 | -2.50661400 |
| H  | 4.57658200  | -2.23915000 | 5.89724300  |
| H  | 8.03460500  | 0.75757400  | -5.89025100 |
| H  | 7.04804400  | -4.70794600 | -4.85217700 |
| H  | 8.97439000  | -6.14530600 | -1.84343000 |
| H  | 8.97408400  | -6.14506200 | 1.84805800  |
| H  | 7.04723800  | -4.70730400 | 4.85629400  |
| H  | 5.37783800  | -9.20446800 | 1.87842000  |
| H  | 5.37815100  | -9.20471700 | -1.87398900 |
| H  | 2.72209100  | -5.24523500 | 4.92965100  |
| H  | 2.72291500  | -5.24588400 | -4.92618300 |
| H  | 0.71948600  | -9.61562500 | 1.86427900  |
| H  | 0.71979500  | -9.61587200 | -1.86056900 |
| H  | -0.67212100 | -7.93004000 | 4.87800400  |
| H  | -0.67130700 | -7.93068400 | -4.87474800 |
| H  | -0.77850200 | -4.28455400 | 5.89341000  |
| H  | -0.77752000 | -4.28533100 | -5.89065700 |
| H  | -4.39268800 | -7.09058000 | 5.89681500  |
| H  | -4.39170400 | -7.09135700 | -5.89428900 |
| H  | -3.28516300 | -1.01837000 | 7.44933700  |
| H  | -3.28391600 | -1.01935000 | -7.44742900 |
| H  | 5.22422000  | -7.85058500 | -3.84218200 |
| H  | 5.22358100  | -7.85007600 | 3.84641000  |
| Al | -3.48805400 | -0.38383600 | -1.51566100 |
| Si | -2.89758100 | -2.36074200 | 3.64442500  |
| Si | -3.53169800 | -0.38416300 | 1.49884500  |
| Si | -2.99941200 | 2.45055600  | 2.28310300  |

|    |             |             |             |
|----|-------------|-------------|-------------|
| Si | -6.59633600 | -0.49568300 | 2.28168700  |
| Si | -2.98086300 | 2.43847100  | -2.27514500 |
| Si | -2.89191300 | -2.35200200 | -3.61365200 |
| Si | -6.58615700 | -0.49054300 | -2.28202600 |
| O  | -3.03492300 | -1.76145800 | 2.18510300  |
| O  | -2.83116100 | 0.86375800  | 2.22792000  |
| O  | -2.91216600 | -0.47713600 | 0.07512200  |
| O  | -5.14196500 | -0.25765300 | 1.65512400  |
| O  | -5.18434100 | -0.21114900 | -1.64073400 |
| O  | -2.91882500 | -1.89327700 | -2.10656900 |
| O  | -2.60925500 | 0.91612700  | -2.16522400 |
| O  | -1.44114400 | -2.95385900 | -3.83803200 |
| O  | -1.45214100 | -2.98782400 | 3.74595600  |
| O  | 0.78109100  | -4.03458000 | -3.96659500 |
| O  | 0.78487100  | -3.99799100 | 3.97039800  |
| O  | 2.97899400  | -2.84988400 | -4.06949400 |
| O  | 4.15254600  | -0.66466900 | -4.02234400 |
| O  | 4.47037300  | 1.18283600  | -2.34137300 |
| O  | 2.92900300  | 3.21547400  | -1.78843000 |
| O  | 0.52025000  | 3.95729700  | -2.12838900 |
| O  | -1.83456000 | 3.23576500  | -1.46744500 |
| O  | -1.78015100 | 3.14994200  | 1.52404100  |
| O  | 0.52372300  | 3.94720200  | 2.16149700  |
| O  | 2.92886600  | 3.20784700  | 1.79110700  |
| O  | 2.98734500  | -2.85088500 | 4.06967500  |
| O  | 4.15139800  | -0.66263900 | 4.01857400  |
| O  | 4.47283100  | 1.18460000  | 2.34313600  |
| O  | 4.50766100  | 2.07365800  | -0.00174500 |
| O  | -0.49915000 | 5.01737200  | 0.02020000  |
| Si | -0.70197900 | -4.18896400 | -4.48331900 |
| Si | 2.32967600  | -4.29416700 | -3.93999000 |
| Si | -0.69731600 | -4.18939700 | 4.47144400  |
| Si | 2.33257400  | -4.29261700 | 3.94191500  |
| Si | 4.34935600  | -2.16041700 | 4.49935300  |
| Si | 4.34413300  | -2.16500000 | -4.49577500 |
| Si | 4.88502400  | 0.72269200  | -3.81157600 |
| Si | 4.88689100  | 0.72734200  | 3.81282400  |
| Si | 4.34544500  | 2.53443500  | -1.51807400 |
| Si | 4.34892700  | 2.53383700  | 1.51180800  |
| Si | 2.03751900  | 4.37079800  | 2.44829500  |
| Si | 2.03033400  | 4.37233500  | -2.44491400 |
| Si | -0.83584200 | 4.43963300  | 1.47155600  |
| Si | -0.84208200 | 4.46354000  | -1.44518100 |
| H  | -0.06979100 | -4.03561800 | -0.98186700 |

|   |             |             |             |
|---|-------------|-------------|-------------|
| C | 0.46850000  | -3.11484100 | -0.75059900 |
| H | 1.39921800  | -3.40376400 | -0.25402200 |
| H | 0.68871400  | -2.60273000 | -1.68604500 |
| C | -0.38080100 | -2.28202800 | 0.14394900  |
| O | 0.89334300  | -0.82047500 | 0.52033700  |
| C | 0.67499300  | 0.44803000  | -0.12447900 |
| H | 1.39169000  | 1.16249800  | 0.29549000  |
| H | -0.33121400 | 0.76593300  | 0.16268700  |
| C | 0.79025800  | 0.36349500  | -1.63503300 |
| H | 0.02765600  | -0.30090200 | -2.04971100 |
| H | 0.61372100  | 1.35635200  | -2.05505000 |
| H | 1.77874200  | 0.01685700  | -1.94891100 |
| C | 2.14883900  | -1.05896800 | 1.16492500  |
| H | 2.31114600  | -0.26425500 | 1.89990500  |
| H | 2.00491300  | -1.98997400 | 1.72060500  |
| C | 3.32514400  | -1.16581700 | 0.21362500  |
| H | 3.52110700  | -0.22481700 | -0.30077400 |
| H | 4.22278400  | -1.41136600 | 0.78950200  |
| H | 3.16670000  | -1.94654200 | -0.53510400 |
| O | -2.10463000 | -3.43144000 | 0.00732200  |
| H | -0.41703700 | -2.47813000 | 1.20689600  |
| H | -1.02869200 | -1.50678700 | -0.22993500 |
| H | -2.48794800 | -3.02955500 | -0.80270400 |
| H | -2.63410100 | -3.05565000 | 0.72662000  |

## TS7

|    |             |             |             |
|----|-------------|-------------|-------------|
| O  | 4.33381700  | 3.31126300  | -1.75997100 |
| O  | 3.27245300  | 2.46268900  | -3.93810900 |
| O  | 7.36585800  | -1.93435600 | -1.86059100 |
| O  | 7.74318900  | 0.60101600  | -1.88072900 |
| O  | 6.71902900  | -0.53037200 | -3.95330200 |
| O  | 4.22164800  | -3.40622000 | -3.78767900 |
| O  | 3.12497000  | -1.41942400 | -4.98127100 |
| O  | 1.22669800  | -5.70827500 | -3.86353300 |
| O  | 4.22131800  | -3.39942500 | 3.80572100  |
| O  | 3.12419300  | -1.41095300 | 4.99582800  |
| O  | 1.22618800  | -5.70153400 | 3.88514600  |
| Si | 1.41355300  | -7.28343100 | -3.78936800 |
| Si | 1.41304600  | -7.27681500 | 3.81374600  |
| O  | -2.66433900 | -5.00251600 | -2.42570700 |
| O  | 2.96102300  | -7.65424200 | -3.88563800 |
| O  | 0.90938300  | -7.82805500 | -2.37921700 |
| O  | -2.66466200 | -4.99827600 | 2.44558900  |

|    |             |             |             |
|----|-------------|-------------|-------------|
| O  | 2.96050900  | -7.64745400 | 3.91086400  |
| O  | 0.90906900  | -7.82389100 | 2.40447800  |
| Si | -2.78024900 | -6.30168300 | -1.51918900 |
| Si | -0.36973400 | -8.25510700 | -1.52353200 |
| Si | -2.78045500 | -6.29901900 | 1.54131000  |
| Si | -0.36993800 | -8.25243000 | 1.54936900  |
| O  | -1.58984600 | -7.29495300 | -1.87045000 |
| O  | -4.15030000 | -7.03898300 | -1.75143900 |
| O  | -2.70181100 | -5.82295400 | 0.01069700  |
| O  | 0.05514600  | -8.13818800 | 0.01289600  |
| O  | -1.59009300 | -7.29167300 | 1.89445200  |
| O  | -4.15053400 | -7.03591300 | 1.77466100  |
| O  | 4.33360800  | 3.31422700  | 1.76625800  |
| O  | 3.27185100  | 2.46975200  | 3.94572700  |
| O  | 7.36558300  | -1.93108700 | 1.87648000  |
| O  | 7.74302800  | 0.60433100  | 1.89220300  |
| O  | 6.71856100  | -0.52347300 | 3.96661800  |
| Si | 3.68560900  | -0.48544600 | 6.15437500  |
| Si | 3.11330500  | 2.45182100  | 5.52028000  |
| Si | 6.73368100  | -0.58126400 | 5.53306200  |
| O  | 3.01843200  | 0.95911300  | 6.05638300  |
| O  | 5.26685700  | -0.35959100 | 6.08156800  |
| O  | 7.28116800  | -1.97960800 | 6.04531400  |
| Si | 3.11401800  | 2.44231800  | -5.51261200 |
| Si | 6.73443100  | -0.59083300 | -5.51963700 |
| Si | 3.68643100  | -0.49627400 | -6.14161400 |
| O  | 3.01928700  | 0.94857400  | -6.04613100 |
| O  | 7.28204300  | -1.99008800 | -6.02937900 |
| O  | 5.26764400  | -0.37023800 | -6.06871700 |
| Si | 5.70383500  | 4.04841000  | -1.52761600 |
| Si | 8.11433200  | 2.09502200  | -1.53197500 |
| Si | 5.70361700  | 4.05111200  | 1.53285300  |
| Si | 8.11412600  | 2.09769900  | 1.54091700  |
| O  | 6.89422300  | 3.05517700  | -1.87889600 |
| O  | 5.81972300  | 5.34761600  | -2.43415600 |
| O  | 5.78226000  | 4.52717500  | 0.00224800  |
| O  | 8.53922100  | 2.21193900  | 0.00444200  |
| O  | 6.89397800  | 3.05845100  | 1.88599700  |
| O  | 5.81940900  | 5.35185100  | 2.43713300  |
| Si | 7.35262700  | -3.48039700 | -1.53289400 |
| Si | 7.35240900  | -3.47770800 | 1.55140400  |
| O  | 6.21230600  | -4.22002400 | -2.35021700 |
| O  | 7.07154100  | -3.71281300 | 0.00950700  |
| O  | 6.21199500  | -4.21592000 | 2.36989500  |

|    |             |             |             |
|----|-------------|-------------|-------------|
| Si | 5.41938500  | -4.42595600 | -3.71157400 |
| O  | 4.85763000  | -5.90885300 | -3.74773000 |
| O  | 6.40212500  | -4.19944600 | -4.93112200 |
| Si | 7.27412100  | -3.57196500 | -6.08970600 |
| Si | 4.40669200  | -7.26867500 | -4.42067600 |
| Si | 5.41884400  | -4.41954100 | 3.73150300  |
| O  | 4.85713200  | -5.90230700 | 3.77017000  |
| O  | 6.40147200  | -4.19084400 | 4.95078700  |
| Si | 7.27331900  | -3.56134700 | 6.10839100  |
| Si | 4.40610900  | -7.26095400 | 4.44542000  |
| O  | -5.67418400 | -2.96551700 | -3.75096000 |
| O  | -5.67471500 | -2.95900400 | 3.76692100  |
| O  | -6.58346200 | 0.55503800  | -3.86964000 |
| O  | -6.58400300 | 0.56215400  | 3.87910000  |
| O  | -5.57922300 | 3.62984900  | -1.88041100 |
| O  | -5.57860800 | 3.63404900  | 1.88458600  |
| O  | -2.55447600 | 5.84112900  | -1.80194100 |
| O  | -2.55506300 | 5.84451200  | 1.80332000  |
| O  | 1.42085300  | 5.72611500  | -2.35924700 |
| O  | 1.42050100  | 5.73031800  | 2.36089600  |
| Si | 6.17752800  | 5.98104100  | -3.84949200 |
| Si | 6.17701900  | 5.98774700  | 3.85140500  |
| Si | 1.46606200  | 6.54286900  | -3.72136800 |
| Si | 1.46557900  | 6.54930100  | 3.72171000  |
| Si | -6.78569800 | 4.60352500  | -1.52901300 |
| Si | -6.78642100 | 4.60554400  | 1.53162300  |
| Si | -2.79476200 | 7.37280900  | -1.52792400 |
| Si | -2.79495500 | 7.37542900  | 1.52603300  |
| O  | 5.40607400  | 7.37437900  | -3.97615500 |
| O  | 5.40555100  | 7.38130100  | 3.97554000  |
| O  | 0.23108600  | 7.51694900  | -3.79752300 |
| O  | 2.80985600  | 7.38458900  | -3.75943500 |
| O  | 0.23059100  | 7.52356600  | 3.79597500  |
| O  | 2.80936400  | 7.39112500  | 3.75846200  |
| Si | 4.05421300  | 8.09293100  | -4.43407200 |
| Si | 4.05362800  | 8.10065200  | 4.43202500  |
| O  | -4.30461400 | 7.74624700  | -1.83595400 |
| O  | -1.82451300 | 8.30156100  | -2.40736500 |
| O  | -2.48168200 | 7.71386600  | -0.00105000 |
| O  | -4.30486800 | 7.74943600  | 1.83338600  |
| O  | -1.82479800 | 8.30574900  | 2.40414900  |
| Si | -1.00250200 | 8.48847300  | -3.75724800 |
| Si | -1.00299700 | 8.49501000  | 3.75384800  |
| O  | -6.33207500 | 6.09096600  | -1.76297800 |

|    |             |             |             |
|----|-------------|-------------|-------------|
| O  | -8.03791700 | 4.23359900  | -2.43408600 |
| O  | -7.23882000 | 4.43373900  | 0.00145700  |
| O  | -6.33232800 | 6.09402900  | 1.76311900  |
| O  | -8.03824000 | 4.23783300  | 2.43716200  |
| Si | -5.76551200 | 7.43084100  | -2.38164000 |
| Si | -5.76582300 | 7.43498400  | 2.37945900  |
| Si | -8.58994500 | 3.75709800  | -3.84852900 |
| Si | -8.59045600 | 3.76380100  | 3.85236700  |
| Si | -8.05025100 | 0.77613100  | -4.41850300 |
| Si | -8.05080300 | 0.78365200  | 4.42775200  |
| O  | -8.59778200 | 2.17525800  | -3.90886600 |
| O  | -8.59830500 | 2.18206000  | 3.91544100  |
| O  | -9.00610800 | -0.35038600 | -3.80116900 |
| O  | -9.00660400 | -0.34377100 | 3.81212200  |
| Si | -9.48663700 | -1.86173300 | -3.74879600 |
| Si | -9.48713400 | -1.85519600 | 3.76230000  |
| O  | -8.25298300 | -2.83317700 | -3.78907100 |
| O  | -8.25348000 | -2.82656600 | 3.80443000  |
| Si | -7.01799400 | -3.80729200 | -3.71294100 |
| Si | -7.01848000 | -3.80082400 | 3.73016100  |
| O  | -7.06325000 | -4.62391200 | -2.35073400 |
| O  | -7.06356500 | -4.61979600 | 2.36936300  |
| Si | -5.35351900 | -7.85801000 | -2.36830500 |
| Si | -5.35383200 | -7.85386500 | 2.39279100  |
| Si | -7.56415500 | -5.88647000 | -1.53176500 |
| Si | -7.56435800 | -5.88378500 | 1.55253200  |
| O  | -6.72509500 | -7.17983800 | -1.92258400 |
| O  | -6.72535000 | -7.17647300 | 1.94571300  |
| O  | -7.39011100 | -5.56367900 | 0.01016500  |
| H  | 5.29868600  | -8.35098500 | 4.02584500  |
| H  | 5.29921400  | -8.35796800 | -3.99908500 |
| H  | 8.67056400  | -4.01629200 | -5.97385000 |
| H  | 8.67670500  | -4.00652500 | -1.89463400 |
| H  | 8.67645700  | -4.00320900 | 1.91426200  |
| H  | 8.66977600  | -4.00587200 | 5.99349100  |
| H  | 6.76320600  | -3.99925600 | 7.41564800  |
| H  | 6.76418100  | -4.01214800 | -7.39626500 |
| H  | 7.61191000  | 0.44332200  | -6.08648400 |
| H  | 7.61118100  | 0.45386900  | 6.09821800  |
| H  | 9.29165500  | 2.48809600  | -2.31958100 |
| H  | 9.29135500  | 2.49213600  | 2.32797700  |
| H  | 7.61640700  | 6.27637200  | -3.90695100 |
| H  | 7.61589200  | 6.28317700  | 3.90853700  |
| H  | 5.76277700  | 5.07850400  | 4.92963800  |

|   |              |             |             |
|---|--------------|-------------|-------------|
| H | 4.14192600   | 9.47482100  | -3.94051500 |
| H | 3.90709100   | 8.07397300  | -5.89656800 |
| H | 4.14140900   | 9.48167800  | 3.93607600  |
| H | 3.90631700   | 8.08423600  | 5.89453200  |
| H | 5.76342700   | 5.06992500  | -4.92619400 |
| H | 4.26887200   | 3.11090200  | 6.14583500  |
| H | 1.86964800   | 3.11364900  | 5.94020700  |
| H | 4.26964600   | 3.10027800  | -6.13916300 |
| H | 1.87039900   | 3.10325500  | -5.93385800 |
| H | 1.43797300   | 5.60529300  | -4.85326400 |
| H | 1.43732300   | 5.61374500  | 4.85520200  |
| H | -1.87313500  | 8.21989600  | -4.91083800 |
| H | -0.55736200  | 9.88861500  | -3.80578000 |
| H | -0.55786300  | 9.89523500  | 3.80000400  |
| H | -1.87378200  | 8.22844300  | 4.90778800  |
| H | -2.09666600  | 4.50055800  | -3.85151900 |
| H | -2.09691700  | 4.50708100  | 3.85519300  |
| H | -5.71415800  | 7.31115700  | 3.84332100  |
| H | -6.62709900  | 8.55245000  | 1.96669300  |
| H | -6.62684100  | 8.54902100  | -1.97093700 |
| H | -5.71364900  | 7.30446300  | -3.84528000 |
| H | -7.77866600  | 4.34088400  | -4.92645300 |
| H | -9.98639000  | 4.20142100  | -3.96438700 |
| H | -9.98691000  | 4.20832600  | 3.96726600  |
| H | -7.77931400  | 4.34946100  | 4.92937900  |
| H | -4.48174600  | 1.53758900  | -4.87236700 |
| H | -8.03584100  | 0.71924300  | -5.88743300 |
| H | -10.35723800 | -2.13024700 | -4.90242500 |
| H | -10.24583400 | -2.03431100 | -2.50190700 |
| H | -4.48238900  | 1.54600600  | 4.88049100  |
| H | -4.57775500  | -2.26590400 | 5.90299200  |
| H | -10.35788300 | -2.12170100 | 4.91627600  |
| H | -10.24616400 | -2.02994300 | 2.51561200  |
| H | -4.57696200  | -2.27612000 | -5.88809100 |
| H | -8.03661600  | 0.72950300  | 5.89662800  |
| H | -7.04674600  | -4.73638800 | 4.86365200  |
| H | -8.97227200  | -6.17773500 | 1.85629000  |
| H | -8.97202900  | -6.18094900 | -1.83519800 |
| H | -7.04611400  | -4.74483100 | -4.84481800 |
| H | -5.37392500  | -9.23819500 | -1.86275900 |
| H | -5.37417200  | -9.23492900 | 1.88964900  |
| H | -2.72063800  | -5.28019000 | -4.91773900 |
| H | -2.72129100  | -5.27162900 | 4.93808900  |
| H | -0.71532200  | -9.64650200 | -1.84831700 |

|    |             |             |             |
|----|-------------|-------------|-------------|
| H  | -0.71556600 | -9.64326100 | 1.87653100  |
| H  | 0.67520400  | -7.96289400 | -4.86364300 |
| H  | 0.67456200  | -7.95440500 | 4.88910500  |
| H  | 0.77935400  | -4.31830000 | -5.88246700 |
| H  | 0.77857900  | -4.30805100 | 5.90159800  |
| H  | 4.39524400  | -7.12212500 | -5.88330800 |
| H  | 4.39446600  | -7.11186000 | 5.90779200  |
| H  | 3.28400600  | -1.05205000 | -7.44149600 |
| H  | 3.28302300  | -1.03908300 | 7.45526600  |
| H  | -5.22103100 | -7.87885900 | 3.85657000  |
| H  | -5.22052600 | -7.88555100 | -3.83201900 |
| Al | 3.53156200  | -0.43056800 | 1.53626700  |
| Si | 2.88419300  | -2.40904200 | -3.65832500 |
| Si | 3.55659800  | -0.43177200 | -1.49088800 |
| Si | 2.98909200  | 2.44239000  | -2.26997200 |
| Si | 6.60189200  | -0.52358100 | -2.27460500 |
| Si | 2.97659700  | 2.42319300  | 2.27124800  |
| Si | 2.88322200  | -2.38613200 | 3.63621800  |
| Si | 6.59198700  | -0.51295400 | 2.28917000  |
| O  | 3.00994800  | -1.71017700 | -2.26311600 |
| O  | 2.81643100  | 0.87353400  | -2.06450100 |
| O  | 2.93971100  | -0.69714100 | -0.06065200 |
| O  | 5.15488400  | -0.27115000 | -1.62534800 |
| O  | 5.21227700  | -0.19827800 | 1.61192900  |
| O  | 2.92171300  | -1.87290700 | 2.16692900  |
| O  | 2.61437000  | 0.91177100  | 2.04518100  |
| O  | 1.43118600  | -2.97394100 | 3.86770000  |
| O  | 1.43596300  | -3.02375000 | -3.74695300 |
| O  | -0.78145800 | -4.06656900 | 3.96980600  |
| O  | -0.79367300 | -4.03508000 | -3.96876700 |
| O  | -2.97423100 | -2.87490200 | 4.08853900  |
| O  | -4.15292700 | -0.69282700 | 4.03763800  |
| O  | -4.47912100 | 1.14999300  | 2.34877400  |
| O  | -2.94526200 | 3.18559500  | 1.79259200  |
| O  | -0.53588300 | 3.92050100  | 2.12575100  |
| O  | 1.82997000  | 3.23350800  | 1.48114700  |
| O  | 1.76592200  | 3.14708000  | -1.52859900 |
| O  | -0.53993700 | 3.91233000  | -2.15237300 |
| O  | -2.94213000 | 3.17664700  | -1.78274800 |
| O  | -2.98542700 | -2.87687100 | -4.05820500 |
| O  | -4.15514700 | -0.69427600 | -4.02866900 |
| O  | -4.46864300 | 1.14091400  | -2.33484600 |
| O  | -4.52766700 | 2.03277400  | 0.00709100  |
| O  | 0.47471700  | 5.00276000  | -0.01412100 |



|    |             |             |             |
|----|-------------|-------------|-------------|
| Si | 0.69702700  | -4.21628300 | 4.49497600  |
| Si | -2.32847600 | -4.32112700 | 3.94807200  |
| Si | 0.68634100  | -4.22930200 | -4.46479500 |
| Si | -2.34078900 | -4.32420800 | -3.92860400 |
| Si | -4.35151600 | -2.19756900 | -4.49172800 |
| Si | -4.34295800 | -2.19558800 | 4.50637700  |
| Si | -4.88757200 | 0.69075600  | 3.82113700  |
| Si | -4.88940100 | 0.69253800  | -3.80604700 |
| Si | -4.36012000 | 2.49872200  | 1.52190400  |
| Si | -4.35880400 | 2.49313200  | -1.50584900 |
| Si | -2.05255800 | 4.33667400  | -2.44504200 |
| Si | -2.04279200 | 4.34187800  | 2.44675800  |
| Si | 0.81291700  | 4.42534700  | -1.46430800 |
| Si | 0.82211200  | 4.44499000  | 1.44986100  |
| C  | 0.93527400  | -2.54762100 | -0.14906900 |
| H  | 0.81513500  | -2.87329100 | -1.18161400 |
| H  | 0.12605000  | -2.93402400 | 0.47560800  |
| C  | 0.95250200  | -1.07084500 | -0.02159400 |
| H  | 0.89581800  | -0.39637900 | -0.85830700 |
| H  | 0.94804100  | -0.62473400 | 0.95915800  |
| O  | -1.13036200 | -0.83869300 | 0.01309800  |
| C  | -1.53035400 | 0.34820700  | 0.70841700  |
| H  | -2.61253100 | 0.44544500  | 0.57718400  |
| H  | -1.04956000 | 1.22875600  | 0.26239300  |
| C  | -1.18850900 | 0.22400000  | 2.18043600  |
| H  | -0.11333900 | 0.27446600  | 2.36832300  |
| H  | -1.64286500 | 1.06285900  | 2.71075500  |
| H  | -1.59003000 | -0.70466800 | 2.59292200  |
| C  | -1.74892200 | -1.02629500 | -1.26870200 |
| H  | -1.55603000 | -2.07042200 | -1.52876200 |
| H  | 1.86978500  | -2.93099900 | 0.26480500  |
| H  | -2.83115400 | -0.90229400 | -1.14137300 |
| C  | -1.23747000 | -0.09685700 | -2.35875400 |
| H  | -1.80183600 | -0.30264000 | -3.27066300 |
| H  | -1.37867400 | 0.95614400  | -2.10130800 |
| H  | -0.18133100 | -0.26727300 | -2.58388500 |

## TS8

|   |             |             |            |
|---|-------------|-------------|------------|
| O | -4.30863300 | 3.30940700  | 1.76092400 |
| O | -3.24818400 | 2.46433800  | 3.94086300 |
| O | -7.34245700 | -1.93500500 | 1.86996300 |
| O | -7.71897300 | 0.60052200  | 1.88549200 |
| O | -6.69575600 | -0.52752600 | 3.96036800 |

|    |             |             |             |
|----|-------------|-------------|-------------|
| O  | -4.19932900 | -3.40448500 | 3.80062600  |
| O  | -3.10232300 | -1.41594000 | 4.99097800  |
| O  | -1.20514200 | -5.70740700 | 3.88146400  |
| O  | -4.19679500 | -3.41117700 | -3.79305200 |
| O  | -3.09854700 | -1.42518500 | -4.98616900 |
| O  | -1.20242300 | -5.71447700 | -3.86731100 |
| Si | -1.39247800 | -7.28263100 | 3.81002100  |
| Si | -1.38967000 | -7.28954500 | -3.79304000 |
| O  | 2.68656500  | -5.00549000 | 2.44353600  |
| O  | -2.94011000 | -7.65275500 | 3.90649000  |
| O  | -0.88807900 | -7.82992800 | 2.40099600  |
| O  | 2.68835900  | -5.00994900 | -2.42775800 |
| O  | -2.93727200 | -7.65984000 | -3.89000600 |
| O  | -0.88634400 | -7.83427400 | -2.38269800 |
| Si | 2.80231500  | -6.30630700 | 1.53935400  |
| Si | 0.39115300  | -8.25892400 | 1.54645400  |
| Si | 2.80342600  | -6.30908800 | -1.52113900 |
| Si | 0.39227100  | -8.26171600 | -1.52644600 |
| O  | 1.61147700  | -7.29855700 | 1.89202500  |
| O  | 4.17205200  | -7.04364600 | 1.77332400  |
| O  | 2.72448500  | -5.83027800 | 0.00859500  |
| O  | -0.03323300 | -8.14459900 | 0.00969500  |
| O  | 1.61284600  | -7.30197700 | -1.87287200 |
| O  | 4.17333700  | -7.04684900 | -1.75277300 |
| O  | -4.30748100 | 3.30615100  | -1.76531800 |
| O  | -3.24536200 | 2.45715500  | -3.94293100 |
| O  | -7.34104200 | -1.93838300 | -1.86696000 |
| O  | -7.71759900 | 0.59709000  | -1.88733300 |
| O  | -6.69287800 | -0.53476900 | -3.95943800 |
| Si | -3.65927900 | -0.50158600 | -6.14649000 |
| Si | -3.08622500 | 2.43671400  | -5.51743500 |
| Si | -6.70763200 | -0.59528400 | -5.52590000 |
| O  | -2.99176200 | 0.94293000  | -6.05082600 |
| O  | -5.24056500 | -0.37512700 | -6.07438600 |
| O  | -7.25542400 | -1.99437100 | -6.03582600 |
| Si | -3.09025000 | 2.44674800  | 5.51545800  |
| Si | -6.71166600 | -0.58520600 | 5.52679900  |
| Si | -3.66381400 | -0.49055400 | 6.14952200  |
| O  | -2.99616800 | 0.95391000  | 6.05165900  |
| O  | -7.25988200 | -1.98337100 | 6.03886600  |
| O  | -5.24496900 | -0.36411700 | 6.07592500  |
| Si | -5.67834200 | 4.04659300  | 1.52685000  |
| Si | -8.08948300 | 2.09400800  | 1.53395000  |
| Si | -5.67721500 | 4.04384700  | -1.53363800 |

|    |             |             |             |
|----|-------------|-------------|-------------|
| Si | -8.08842200 | 2.09122100  | -1.53900900 |
| O  | -6.86916400 | 3.05437600  | 1.87953200  |
| O  | -5.79406900 | 5.34744400  | 2.43102800  |
| O  | -5.75615300 | 4.52266100  | -0.00390500 |
| O  | -8.51389300 | 2.20832900  | -0.00280300 |
| O  | -6.86779600 | 3.05095200  | -1.88536600 |
| O  | -5.79230500 | 5.34301100  | -2.44025900 |
| Si | -7.32961700 | -3.48165400 | 1.54502800  |
| Si | -7.32852100 | -3.48446700 | -1.53935200 |
| O  | -6.18979700 | -4.22020200 | 2.36400000  |
| O  | -7.04817100 | -3.71690600 | 0.00312200  |
| O  | -6.18803200 | -4.22454000 | -2.35607500 |
| Si | -5.39735000 | -4.42397100 | 3.72595500  |
| O  | -4.83609600 | -5.90698800 | 3.76490700  |
| O  | -6.38037000 | -4.19497400 | 4.94481100  |
| Si | -7.25251100 | -3.56513800 | 6.10200900  |
| Si | -4.38580800 | -7.26576000 | 4.44041400  |
| Si | -5.39459200 | -4.43079700 | -3.71710900 |
| O  | -4.83335900 | -5.91381800 | -3.75302200 |
| O  | -6.37681300 | -4.20390900 | -4.93707000 |
| Si | -7.24807400 | -3.57622600 | -6.09608600 |
| Si | -4.38258400 | -7.27381600 | -4.42568000 |
| O  | 5.69672100  | -2.96715900 | 3.76607500  |
| O  | 5.69946700  | -2.97400000 | -3.75182200 |
| O  | 6.60711900  | 0.55359300  | 3.87860700  |
| O  | 6.60993800  | 0.54655000  | -3.87009100 |
| O  | 5.60400100  | 3.62547700  | 1.88354700  |
| O  | 5.60537000  | 3.62205300  | -1.88135100 |
| O  | 2.58091500  | 5.83729000  | 1.80083300  |
| O  | 2.58222000  | 5.83400900  | -1.80485600 |
| O  | -1.39502100 | 5.72446000  | 2.35670100  |
| O  | -1.39332900 | 5.72013800  | -2.36342500 |
| Si | -6.15208600 | 5.98350300  | 3.84512800  |
| Si | -6.14928500 | 5.97650600  | -3.85576700 |
| Si | -1.44040900 | 6.54350900  | 3.71743100  |
| Si | -1.43769000 | 6.53675600  | -3.72565300 |
| Si | 6.81169800  | 4.59714800  | 1.53090500  |
| Si | 6.81281000  | 4.59436600  | -1.52959300 |
| Si | 2.82127500  | 7.36814300  | 1.52353600  |
| Si | 2.82238800  | 7.36536600  | -1.53016800 |
| O  | -5.38020900 | 7.37681100  | 3.96954300  |
| O  | -5.37731800 | 7.36958300  | -3.98215200 |
| O  | -0.20512400 | 7.51735400  | 3.79219800  |
| O  | -2.78392300 | 7.38577500  | 3.75357900  |

|    |             |             |             |
|----|-------------|-------------|-------------|
| O  | -0.20236100 | 7.51045200  | -3.80129800 |
| O  | -2.78118700 | 7.37894300  | -3.76431300 |
| Si | -4.02824600 | 8.09572900  | 4.42658400  |
| Si | -4.02501900 | 8.08767200  | -4.43951400 |
| O  | 4.33124900  | 7.74165100  | 1.83154100  |
| O  | 1.85112800  | 8.29880800  | 2.40123600  |
| O  | 2.50877600  | 7.70663000  | -0.00378700 |
| O  | 4.33258800  | 7.73831500  | -1.83775400 |
| O  | 1.85288000  | 8.29443500  | -2.41026200 |
| Si | 1.02880300  | 8.48839400  | 3.75056300  |
| Si | 1.03153300  | 8.48156700  | -3.76053100 |
| O  | 6.35818500  | 6.08557700  | 1.76218600  |
| O  | 8.06318900  | 4.22886600  | 2.43709500  |
| O  | 7.26489800  | 4.42491000  | 0.00092500  |
| O  | 6.35946700  | 6.08237000  | -1.76391300 |
| O  | 8.06496000  | 4.22444000  | -2.43420400 |
| Si | 5.79186800  | 7.42673900  | 2.37826100  |
| Si | 5.79359800  | 7.42241100  | -2.38283800 |
| Si | 8.61464800  | 3.75467900  | 3.85252600  |
| Si | 8.61745200  | 3.74768200  | -3.84837100 |
| Si | 8.07378000  | 0.77479200  | 4.42773500  |
| Si | 8.07699700  | 0.76675200  | -4.41855700 |
| O  | 8.62195000  | 2.17294000  | 3.91566600  |
| O  | 8.62479600  | 2.16582900  | -3.90863100 |
| O  | 9.02946200  | -0.35303000 | 3.81261000  |
| O  | 9.03223100  | -0.35994900 | -3.80068600 |
| Si | 9.50950800  | -1.86461800 | 3.76305800  |
| Si | 9.51224400  | -1.87144400 | -3.74803800 |
| O  | 8.27552200  | -2.83557900 | 3.80469500  |
| O  | 8.27828100  | -2.84247900 | -3.78880400 |
| Si | 7.04022900  | -3.80942700 | 3.72992900  |
| Si | 7.04294100  | -3.81618600 | -3.71316800 |
| O  | 7.08562600  | -4.62847100 | 2.36918800  |
| O  | 7.08734300  | -4.63276200 | -2.35091000 |
| Si | 5.37481600  | -7.86197300 | 2.39200500  |
| Si | 5.37654800  | -7.86629900 | -2.36909000 |
| Si | 7.58635400  | -5.89265400 | 1.55261900  |
| Si | 7.58747600  | -5.89545800 | -1.53168000 |
| O  | 6.74674900  | -7.18504900 | 1.94548800  |
| O  | 6.74815700  | -7.18856700 | -1.92280900 |
| O  | 7.41287700  | -5.57255100 | 0.01006300  |
| H  | -5.27564700 | -8.36280000 | -4.00443300 |
| H  | -5.27856700 | -8.35550600 | 4.02049600  |
| H  | -8.64906500 | -4.00920800 | 5.98652700  |

|   |             |             |             |
|---|-------------|-------------|-------------|
| H | -8.65399200 | -4.00669500 | 1.90729400  |
| H | -8.65259700 | -4.01016300 | -1.90162200 |
| H | -8.64471300 | -4.02008200 | -5.98081100 |
| H | -6.73771700 | -4.01662800 | -7.40240800 |
| H | -6.74310400 | -4.00316500 | 7.40950300  |
| H | -7.58898000 | 0.45023900  | 6.09154100  |
| H | -7.58461200 | 0.43911400  | -6.09315700 |
| H | -9.26692200 | 2.48887000  | 2.32050000  |
| H | -9.26521800 | 2.48465000  | -2.32706800 |
| H | -7.59088500 | 6.27941300  | 3.90163300  |
| H | -7.58804400 | 6.27231100  | -3.91385400 |
| H | -5.73502400 | 5.06521100  | -4.93225600 |
| H | -4.11535600 | 9.47676700  | 3.93054200  |
| H | -3.88156700 | 8.07932200  | 5.88915400  |
| H | -4.11249100 | 9.46960800  | -3.94604700 |
| H | -3.87728100 | 8.06860600  | -5.90194500 |
| H | -5.73860800 | 5.07416900  | 4.92357500  |
| H | -4.24139600 | 3.09497300  | -6.14450500 |
| H | -1.84224000 | 3.09726500  | -5.93816800 |
| H | -4.24584000 | 3.10618900  | 6.14049100  |
| H | -1.84653400 | 3.10801200  | 5.93589600  |
| H | -1.41294200 | 5.60797600  | 4.85098100  |
| H | -1.40941100 | 5.59915200  | -4.85748400 |
| H | 1.89900400  | 8.22158100  | 4.90488900  |
| H | 0.58411100  | 9.88876700  | 3.79647400  |
| H | 0.58687800  | 9.88185400  | -3.80931000 |
| H | 1.90257400  | 8.21265800  | -4.91373500 |
| H | 2.12135000  | 4.50011800  | 3.85249400  |
| H | 2.12415800  | 4.49311700  | -3.85441900 |
| H | 5.74232700  | 7.29599700  | -3.84649300 |
| H | 6.65512300  | 8.54032600  | -1.97180400 |
| H | 6.65369000  | 8.54390500  | 1.96582600  |
| H | 5.73952900  | 7.30298400  | 3.84210700  |
| H | 7.80324200  | 4.34064900  | 4.92916800  |
| H | 10.01120500 | 4.19874600  | 3.96800900  |
| H | 10.01409000 | 4.19153800  | -3.96364300 |
| H | 7.80682500  | 4.33169200  | -4.92666300 |
| H | 4.50538600  | 1.53830000  | 4.87897400  |
| H | 8.05893400  | 0.72064300  | 5.89666600  |
| H | 10.37967800 | -2.13136700 | 4.91742200  |
| H | 10.26902100 | -2.03966400 | 2.51670500  |
| H | 4.50893200  | 1.52943500  | -4.87377800 |
| H | 4.60337800  | -2.28433100 | -5.88945100 |
| H | 10.38325000 | -2.14028900 | -4.90127900 |

|    |             |             |             |
|----|-------------|-------------|-------------|
| H  | 10.27084500 | -2.04422500 | -2.50081400 |
| H  | 4.59907800  | -2.27360800 | 5.90165300  |
| H  | 8.06321900  | 0.70993200  | -5.88739400 |
| H  | 7.07123300  | -4.75378000 | -4.84499200 |
| H  | 8.99538300  | -6.19041600 | -1.83449300 |
| H  | 8.99404200  | -6.18706200 | 1.85699400  |
| H  | 7.06770300  | -4.74495600 | 4.86347600  |
| H  | 5.39491600  | -9.24306000 | 1.88892100  |
| H  | 5.39628100  | -9.24647200 | -1.86348500 |
| H  | 2.74203800  | -5.27876900 | 4.93607300  |
| H  | 2.74564600  | -5.28776500 | -4.91973900 |
| H  | 0.73618500  | -9.64985300 | 1.87381700  |
| H  | 0.73753600  | -9.65324000 | -1.85103000 |
| H  | -0.65468200 | -7.96042300 | 4.88572900  |
| H  | -0.65113000 | -7.96928800 | -4.86701600 |
| H  | -0.75792300 | -4.31400000 | 5.89805200  |
| H  | -0.75355600 | -4.32481200 | -5.88609700 |
| H  | -4.37474700 | -7.11661200 | 5.90278500  |
| H  | -4.37045900 | -7.12732800 | -5.88831200 |
| H  | -3.26196000 | -1.04413900 | 7.45050200  |
| H  | -3.25647600 | -1.05764400 | -7.44625000 |
| H  | 5.24417400  | -7.89385400 | -3.83286200 |
| H  | 5.24137800  | -7.88686600 | 3.85572600  |
| Al | -3.47437500 | -0.41535100 | -1.50761300 |
| Si | -2.86077200 | -2.40703000 | 3.66739200  |
| Si | -3.51517800 | -0.44335600 | 1.48753200  |
| Si | -2.96410300 | 2.43922200  | 2.27464300  |
| Si | -6.57139500 | -0.52444500 | 2.28011200  |
| Si | -2.94316600 | 2.42647800  | -2.27132900 |
| Si | -2.85880900 | -2.40299000 | -3.63862700 |
| Si | -6.56770500 | -0.52385000 | -2.28407800 |
| O  | -2.96779800 | -1.73286600 | 2.25335100  |
| O  | -2.81153500 | 0.86660200  | 2.09102100  |
| O  | -2.87238200 | -0.67945600 | 0.06763400  |
| O  | -5.12258900 | -0.30213600 | 1.62128200  |
| O  | -5.15748000 | -0.26447700 | -1.64866200 |
| O  | -2.80580600 | -1.87631500 | -2.14584100 |
| O  | -2.58266700 | 0.90821700  | -2.07612000 |
| O  | -1.41374200 | -3.00596200 | -3.85453400 |
| O  | -1.41440900 | -3.02489400 | 3.75945700  |
| O  | 0.80905300  | -4.06639200 | -3.93484100 |
| O  | 0.81583200  | -4.04828400 | 3.98532200  |
| O  | 3.00286700  | -2.88893400 | -4.07943400 |
| O  | 4.17686600  | -0.70258400 | -4.03527200 |

|    |             |             |             |
|----|-------------|-------------|-------------|
| O  | 4.50290900  | 1.13493000  | -2.34021900 |
| O  | 2.96985400  | 3.17200500  | -1.79439600 |
| O  | 0.55917300  | 3.91946000  | -2.13179100 |
| O  | -1.80490800 | 3.23070900  | -1.47058500 |
| O  | -1.74183500 | 3.13968100  | 1.52840100  |
| O  | 0.56262000  | 3.91493200  | 2.16426500  |
| O  | 2.96993700  | 3.17652800  | 1.78802800  |
| O  | 3.00824900  | -2.88084600 | 4.08461200  |
| O  | 4.17461700  | -0.69161200 | 4.04799300  |
| O  | 4.50021400  | 1.14092900  | 2.34528200  |
| O  | 4.55032900  | 2.02793000  | -0.00001900 |
| O  | -0.44797300 | 4.99691200  | 0.01826900  |
| Si | -0.65777400 | -4.24037100 | -4.48242000 |
| Si | 2.36157000  | -4.33245700 | -3.93114600 |
| Si | -0.66310700 | -4.22795100 | 4.48139100  |
| Si | 2.36578900  | -4.32351900 | 3.94647000  |
| Si | 4.37342300  | -2.19326100 | 4.50529600  |
| Si | 4.37330400  | -2.20457100 | -4.49370900 |
| Si | 4.91372100  | 0.68099600  | -3.80968800 |
| Si | 4.91153600  | 0.69027500  | 3.81550300  |
| Si | 4.38267100  | 2.48471400  | -1.51386800 |
| Si | 4.38369300  | 2.48686000  | 1.51199900  |
| Si | 2.08013300  | 4.33285100  | 2.44725700  |
| Si | 2.07235300  | 4.32844800  | -2.44620500 |
| Si | -0.78608900 | 4.41914900  | 1.46887900  |
| Si | -0.79109000 | 4.44148200  | -1.44554100 |
| C  | -0.62756200 | -1.28830900 | 0.14348900  |
| H  | -0.91962300 | -1.72906600 | 1.09151500  |
| H  | -0.50807400 | -0.21073700 | 0.11532800  |
| C  | -0.34247100 | -2.07806400 | -0.96488400 |
| H  | -1.46320800 | -2.03102300 | -1.42795200 |
| H  | 0.24125800  | -1.63348900 | -1.76893200 |
| H  | -0.18694800 | -3.14261300 | -0.79527800 |

## TS9

|   |             |             |            |
|---|-------------|-------------|------------|
| O | -4.32487400 | 3.29802000  | 1.76082800 |
| O | -3.26192100 | 2.45724400  | 3.94120700 |
| O | -7.33959100 | -1.95739300 | 1.87010200 |
| O | -7.72535000 | 0.57674700  | 1.88503800 |
| O | -6.69857000 | -0.54716100 | 3.96040000 |
| O | -4.19163100 | -3.41503300 | 3.80186700 |
| O | -3.10219100 | -1.42227200 | 4.99211700 |
| O | -1.18909200 | -5.70701100 | 3.88393100 |

|    |             |             |             |
|----|-------------|-------------|-------------|
| O  | -4.18709600 | -3.42319000 | -3.79180800 |
| O  | -3.09578300 | -1.43343900 | -4.98502800 |
| O  | -1.18433000 | -5.71557400 | -3.86484100 |
| Si | -1.37066700 | -7.28292100 | 3.81274700  |
| Si | -1.36585400 | -7.29130000 | -3.79031200 |
| O  | 2.70040500  | -4.99119300 | 2.44687800  |
| O  | -2.91696400 | -7.65866500 | 3.90888700  |
| O  | -0.86390900 | -7.82865000 | 2.40396000  |
| O  | 2.70348500  | -4.99659000 | -2.42441500 |
| O  | -2.91207100 | -7.66725200 | -3.88760700 |
| O  | -0.86091400 | -7.83391700 | -2.37973200 |
| Si | 2.82113100  | -6.29175500 | 1.54297900  |
| Si | 0.41710000  | -8.25314600 | 1.54983500  |
| Si | 2.82304800  | -6.29512500 | -1.51751300 |
| Si | 0.41902900  | -8.25652900 | -1.52306500 |
| O  | 1.63382600  | -7.28827000 | 1.89553500  |
| O  | 4.19348600  | -7.02405100 | 1.77744900  |
| O  | 2.74196500  | -5.81630900 | 0.01210800  |
| O  | -0.00729900 | -8.14066600 | 0.01294200  |
| O  | 1.63618800  | -7.29241500 | -1.86936200 |
| O  | 4.19570000  | -7.02793300 | -1.74864800 |
| O  | -4.32279200 | 3.29408500  | -1.76541300 |
| O  | -3.25701900 | 2.44854300  | -3.94258500 |
| O  | -7.33719000 | -1.96149100 | -1.86682000 |
| O  | -7.72298100 | 0.57258800  | -1.88778500 |
| O  | -6.69360200 | -0.55593000 | -3.95940300 |
| Si | -3.65957500 | -0.51211500 | -6.14567300 |
| Si | -3.09739900 | 2.42837600  | -5.51704200 |
| Si | -6.70772700 | -0.61680200 | -5.52585700 |
| O  | -2.99735200 | 0.93484400  | -6.05011700 |
| O  | -5.24133000 | -0.39140500 | -6.07400500 |
| O  | -7.25028300 | -2.01797500 | -6.03565300 |
| Si | -3.10433300 | 2.44053500  | 5.51584600  |
| Si | -6.71467700 | -0.60459400 | 5.52683800  |
| Si | -3.66735200 | -0.49871400 | 6.15033500  |
| O  | -3.00494900 | 0.94815400  | 6.05236300  |
| O  | -7.25792600 | -2.00465000 | 6.03903500  |
| O  | -5.24893800 | -0.37805500 | 6.07630200  |
| Si | -5.69720000 | 4.03016400  | 1.52625400  |
| Si | -8.10121000 | 2.06880600  | 1.53311000  |
| Si | -5.69526600 | 4.02682800  | -1.53423300 |
| Si | -8.09933900 | 2.06542600  | -1.53984800 |
| O  | -6.88448900 | 3.03368200  | 1.87882100  |
| O  | -5.81790300 | 5.33076000  | 2.43014900  |



|    |             |             |             |
|----|-------------|-------------|-------------|
| O  | -5.77634700 | 4.50564800  | -0.00461300 |
| O  | -8.52563400 | 2.18128000  | -0.00377600 |
| O  | -6.88212900 | 3.02953200  | -1.88607600 |
| O  | -5.81485300 | 5.32538900  | -2.44113600 |
| Si | -7.32102900 | -3.50404900 | 1.54547200  |
| Si | -7.31912000 | -3.50745500 | -1.53890700 |
| O  | -6.17873900 | -4.23827700 | 2.36488300  |
| O  | -7.03832700 | -3.73857200 | 0.00368400  |
| O  | -6.17572900 | -4.24352500 | -2.35519000 |
| Si | -5.38590800 | -4.43889300 | 3.72708400  |
| O  | -4.81926400 | -5.91984800 | 3.76647100  |
| O  | -6.37007400 | -4.21324500 | 4.94563900  |
| Si | -7.24480600 | -3.58636700 | 6.10248800  |
| Si | -4.36420200 | -7.27683900 | 4.44235900  |
| Si | -5.38118700 | -4.44715300 | -3.71597800 |
| O  | -4.81454500 | -5.92812700 | -3.75145600 |
| O  | -6.36391200 | -4.22408300 | -4.93623800 |
| Si | -7.23715200 | -3.59980400 | -6.09560300 |
| Si | -4.35864000 | -7.28660200 | -4.42373200 |
| O  | 5.70276800  | -2.94164800 | 3.76980000  |
| O  | 5.70749700  | -2.94993700 | -3.74809300 |
| O  | 6.60029800  | 0.58242100  | 3.88188300  |
| O  | 6.60516100  | 0.57388500  | -3.86681300 |
| O  | 5.58650900  | 3.65024100  | 1.88596500  |
| O  | 5.58887100  | 3.64609200  | -1.87893300 |
| O  | 2.55540400  | 5.85100500  | 1.80203400  |
| O  | 2.55766000  | 5.84703000  | -1.80365500 |
| O  | -1.42023800 | 5.72379200  | 2.35689100  |
| O  | -1.41730100 | 5.71856000  | -2.36323300 |
| Si | -6.17860300 | 5.96578400  | 3.84403300  |
| Si | -6.17377100 | 5.95730300  | -3.85686100 |
| Si | -1.46896600 | 6.54293400  | 3.71745000  |
| Si | -1.46428400 | 6.53474700  | -3.72563200 |
| Si | 6.79074900  | 4.62623900  | 1.53344600  |
| Si | 6.79266800  | 4.62286800  | -1.52705100 |
| Si | 2.79025500  | 7.38267100  | 1.52450000  |
| Si | 2.79217400  | 7.37930400  | -1.52920300 |
| O  | -5.41184300 | 7.36192000  | 3.96837600  |
| O  | -5.40685400 | 7.35316000  | -3.98331600 |
| O  | -0.23725900 | 7.52129000  | 3.79234800  |
| O  | -2.81555000 | 7.38030400  | 3.75308500  |
| O  | -0.23249300 | 7.51292500  | -3.80114600 |
| O  | -2.81083100 | 7.37202400  | -3.76480500 |
| Si | -4.06262900 | 8.08584800  | 4.42562800  |

|    |             |             |             |
|----|-------------|-------------|-------------|
| Si | -4.05706400 | 8.07608500  | -4.44046600 |
| O  | 4.29877700  | 7.76174000  | 1.83282500  |
| O  | 1.81649300  | 8.30996300  | 2.40176700  |
| O  | 2.47692200  | 7.71971900  | -0.00296900 |
| O  | 4.30108300  | 7.75769700  | -1.83646900 |
| O  | 1.81951400  | 8.30466300  | -2.40973000 |
| Si | 0.99313000  | 8.49681300  | 3.75084400  |
| Si | 0.99784200  | 8.48853900  | -3.76024700 |
| O  | 6.33175400  | 6.11305000  | 1.76431900  |
| O  | 8.04333800  | 4.26269700  | 2.44003200  |
| O  | 7.24497200  | 4.45535800  | 0.00361700  |
| O  | 6.33396600  | 6.10916400  | -1.76177900 |
| O  | 8.04639300  | 4.25733300  | -2.43126500 |
| Si | 5.76039300  | 7.45225900  | 2.37998500  |
| Si | 5.76337900  | 7.44701300  | -2.38111200 |
| Si | 8.59615300  | 3.79079800  | 3.85570000  |
| Si | 8.60098800  | 3.78231700  | -3.84519500 |
| Si | 8.06600000  | 0.80907100  | 4.43135000  |
| Si | 8.07155000  | 0.79932600  | -4.41494100 |
| O  | 8.60920300  | 2.20910800  | 3.91915000  |
| O  | 8.61411300  | 2.20049000  | -3.90514500 |
| O  | 9.02594700  | -0.31537800 | 3.81669100  |
| O  | 9.03072300  | -0.32376500 | -3.79660100 |
| Si | 9.51151200  | -1.82521600 | 3.76755900  |
| Si | 9.51622800  | -1.83348900 | -3.74353500 |
| O  | 8.28106200  | -2.80066200 | 3.80906500  |
| O  | 8.28582400  | -2.80902500 | -3.78443200 |
| Si | 7.04934700  | -3.77902100 | 3.73416700  |
| Si | 7.05402100  | -3.78721300 | -3.70892700 |
| O  | 7.09808300  | -4.59815800 | 2.37359900  |
| O  | 7.10104500  | -4.60335800 | -2.34649700 |
| Si | 5.39906300  | -7.83787000 | 2.39660100  |
| Si | 5.40205000  | -7.84311200 | -2.36449300 |
| Si | 7.60362700  | -5.86066500 | 1.55740600  |
| Si | 7.60556200  | -5.86406400 | -1.52689200 |
| O  | 6.76863500  | -7.15603500 | 1.95030900  |
| O  | 6.77106300  | -7.16029900 | -1.91798700 |
| O  | 7.42938500  | -5.54149600 | 0.01474300  |
| H  | -5.24783700 | -8.37875200 | -4.00250500 |
| H  | -5.25287400 | -8.36991200 | 4.02242300  |
| H  | -8.63970200 | -4.03554700 | 5.98673100  |
| H  | -8.64357500 | -4.03384400 | 1.90749700  |
| H  | -8.64117700 | -4.03804600 | -1.90141900 |
| H  | -8.63219400 | -4.04872600 | -5.98060400 |

|   |             |             |             |
|---|-------------|-------------|-------------|
| H | -6.72485400 | -4.03859700 | -7.40170700 |
| H | -6.73414600 | -4.02228100 | 7.41020000  |
| H | -7.59590600 | 0.42775500  | 6.09115100  |
| H | -7.58832400 | 0.41428300  | -6.09354400 |
| H | -9.28028500 | 2.45952400  | 2.31927700  |
| H | -9.27735600 | 2.45440900  | -2.32829000 |
| H | -7.61848700 | 6.25645800  | 3.90010600  |
| H | -7.61358400 | 6.24785100  | -3.91537900 |
| H | -5.75591200 | 5.04731500  | -4.93306400 |
| H | -4.15464300 | 9.46646400  | 3.92929400  |
| H | -3.91627200 | 8.07026100  | 5.88823900  |
| H | -4.14970100 | 9.45778700  | -3.94729200 |
| H | -3.90887600 | 8.05727300  | -5.90285600 |
| H | -5.76209500 | 5.05817200  | 4.92276300  |
| H | -4.25479800 | 3.08229900  | -6.14454100 |
| H | -1.85572000 | 3.09337600  | -5.93758100 |
| H | -4.26248200 | 3.09588200  | 6.14045100  |
| H | -1.86314500 | 3.10641000  | 5.93648000  |
| H | -1.43838400 | 5.60772700  | 4.85118900  |
| H | -1.43229400 | 5.59703300  | -4.85727300 |
| H | 1.86399700  | 8.23339700  | 4.90544800  |
| H | 0.54332600  | 9.89556400  | 3.79636600  |
| H | 0.54809900  | 9.88718500  | -3.80941500 |
| H | 1.87015800  | 8.22258200  | -4.91317300 |
| H | 2.10018100  | 4.51256600  | 3.85383600  |
| H | 2.10502200  | 4.50407900  | -3.85307500 |
| H | 5.71294900  | 7.32013000  | -3.84475500 |
| H | 6.62071400  | 8.56814100  | -1.97007200 |
| H | 6.61824300  | 8.57247800  | 1.96755700  |
| H | 5.70812400  | 7.32859800  | 3.84384100  |
| H | 7.78233600  | 4.37401600  | 4.93201600  |
| H | 9.99105100  | 4.23997500  | 3.97145800  |
| H | 9.99602800  | 4.23123900  | -3.96019100 |
| H | 7.78851900  | 4.36316000  | -4.92381100 |
| H | 4.49472900  | 1.55965600  | 4.88151200  |
| H | 8.05096900  | 0.75515300  | 5.90028600  |
| H | 10.38234800 | -2.08856700 | 4.92220100  |
| H | 10.27198200 | -1.99773500 | 2.52143700  |
| H | 4.50084700  | 1.54891200  | -4.87123600 |
| H | 4.60945800  | -2.26468100 | -5.88614100 |
| H | 10.38850900 | -2.09938200 | -4.89649600 |
| H | 10.27512900 | -2.00326200 | -2.49608000 |
| H | 4.60204800  | -2.25168800 | 5.90495800  |
| H | 8.05836100  | 0.74217200  | -5.88377000 |

|    |             |             |             |
|----|-------------|-------------|-------------|
| H  | 7.08602400  | -4.72491700 | -4.84056100 |
| H  | 9.01461400  | -6.15394600 | -1.82928200 |
| H  | 9.01229900  | -6.14988000 | 1.86220400  |
| H  | 7.07993400  | -4.71422400 | 4.86790400  |
| H  | 5.42432700  | -9.21897100 | 1.89379300  |
| H  | 5.42668100  | -9.22310600 | -1.85861300 |
| H  | 2.75622500  | -5.26378400 | 4.93948200  |
| H  | 2.76243200  | -5.27467800 | -4.91632700 |
| H  | 0.76711400  | -9.64274400 | 1.87755700  |
| H  | 0.76944800  | -9.64684900 | -1.84728800 |
| H  | -0.63068600 | -7.95781100 | 4.88877900  |
| H  | -0.62456100 | -7.96855500 | -4.86396300 |
| H  | -0.74747900 | -4.31159200 | 5.90036400  |
| H  | -0.74000400 | -4.32467400 | -5.88378100 |
| H  | -4.35406700 | -7.12736700 | 5.90470500  |
| H  | -4.34666800 | -7.14035500 | -5.88638900 |
| H  | -3.26382200 | -1.05057900 | 7.45152700  |
| H  | -3.25441000 | -1.06695300 | -7.44522100 |
| H  | 5.27015900  | -7.87143300 | -3.82829400 |
| H  | 5.26533500  | -7.86296300 | 3.86029200  |
| Al | -3.50606400 | -0.42886100 | -1.49796600 |
| Si | -2.85891200 | -2.40831500 | 3.66070900  |
| Si | -3.49712500 | -0.45353800 | 1.49630200  |
| Si | -2.98113800 | 2.42687500  | 2.27842000  |
| Si | -6.56849600 | -0.54408700 | 2.27711500  |
| Si | -2.96317500 | 2.40841800  | -2.27329800 |
| Si | -2.86662700 | -2.39536100 | -3.61570200 |
| Si | -6.56553400 | -0.54169500 | -2.27757000 |
| O  | -2.95398500 | -1.76489300 | 2.22853000  |
| O  | -2.81601100 | 0.84858100  | 2.14505100  |
| O  | -2.82726700 | -0.61190200 | 0.07415100  |
| O  | -5.10968100 | -0.32956800 | 1.62891000  |
| O  | -5.19375600 | -0.23484200 | -1.57808600 |
| O  | -2.92422200 | -1.89122500 | -2.14158200 |
| O  | -2.61659300 | 0.88761400  | -2.10077400 |
| O  | -1.40158500 | -2.99167800 | -3.81589800 |
| O  | -1.41032400 | -3.02016300 | 3.77296300  |
| O  | 0.80567300  | -4.05054000 | -3.86995700 |
| O  | 0.82168800  | -4.04770600 | 3.97715800  |
| O  | 3.00519300  | -2.88045400 | -4.09153000 |
| O  | 4.17574600  | -0.68651600 | -4.02649800 |
| O  | 4.49868100  | 1.15492400  | -2.33571900 |
| O  | 2.95384800  | 3.18541800  | -1.79622700 |
| O  | 0.54092700  | 3.92427600  | -2.12753700 |

|    |             |             |             |
|----|-------------|-------------|-------------|
| O  | -1.81336600 | 3.20626100  | -1.47735200 |
| O  | -1.75841300 | 3.12530600  | 1.52752800  |
| O  | 0.54073300  | 3.92219200  | 2.16072900  |
| O  | 2.95157000  | 3.19137700  | 1.79251100  |
| O  | 3.01364100  | -2.86642300 | 4.08579400  |
| O  | 4.17295300  | -0.67246000 | 4.04748700  |
| O  | 4.49156300  | 1.16236600  | 2.34703700  |
| O  | 4.53464200  | 2.04997700  | 0.00290500  |
| O  | -0.48657000 | 4.99302000  | 0.01612400  |
| Si | -0.66156600 | -4.22507600 | -4.46697500 |
| Si | 2.36561900  | -4.32123800 | -3.93122500 |
| Si | -0.65686700 | -4.22375900 | 4.48437900  |
| Si | 2.37313700  | -4.31002400 | 3.95173800  |
| Si | 4.37616100  | -2.17203400 | 4.50839200  |
| Si | 4.37843300  | -2.18450500 | -4.49102600 |
| Si | 4.90803500  | 0.70238300  | -3.80534400 |
| Si | 4.90422800  | 0.71370700  | 3.81742100  |
| Si | 4.36877100  | 2.50575300  | -1.51156700 |
| Si | 4.36814800  | 2.50917800  | 1.51501400  |
| Si | 2.05569300  | 4.34594600  | 2.44814300  |
| Si | 2.05088800  | 4.34024300  | -2.44485800 |
| Si | -0.81469000 | 4.41573100  | 1.46862900  |
| Si | -0.81904900 | 4.43379700  | -1.44913900 |
| C  | -0.78213200 | -1.34542400 | -0.20458300 |
| H  | -1.27332100 | -1.71190000 | -1.09341000 |
| H  | -0.86231400 | -1.96337400 | 0.68438500  |
| C  | -0.10604800 | -0.03246000 | -0.12843700 |
| H  | -0.47707900 | 0.50972200  | 0.74448800  |
| H  | 0.96490000  | -0.20156700 | 0.02048500  |
| H  | -0.27770600 | 0.55891300  | -1.02587100 |
| O  | 0.83168900  | -2.48863300 | -0.97702200 |
| H  | 1.16892700  | -3.24221900 | -0.47866300 |
| H  | 0.63127200  | -2.81915000 | -1.86639500 |

## TS10

|   |             |             |            |
|---|-------------|-------------|------------|
| O | -4.26656600 | 3.37248900  | 1.76352600 |
| O | -3.21490300 | 2.51731400  | 3.94378100 |
| O | -7.35337000 | -1.84089100 | 1.87374300 |
| O | -7.70418200 | 0.69832500  | 1.88855300 |
| O | -6.69260800 | -0.43946600 | 3.96381800 |
| O | -4.22544100 | -3.34161000 | 3.80505900 |
| O | -3.10844000 | -1.36395600 | 4.99496100 |
| O | -1.25474300 | -5.67472400 | 3.88676500 |

|    |             |             |             |
|----|-------------|-------------|-------------|
| O  | -4.22238000 | -3.35039500 | -3.78861600 |
| O  | -3.10397600 | -1.37595500 | -4.98218300 |
| O  | -1.25148900 | -5.68393100 | -3.86200700 |
| Si | -1.45802100 | -7.24798900 | 3.81573500  |
| Si | -1.45468800 | -7.25700100 | -3.78732400 |
| O  | 2.64398700  | -5.01265900 | 2.44896300  |
| O  | -3.00933100 | -7.60239000 | 3.91217900  |
| O  | -0.95908200 | -7.80075100 | 2.40689900  |
| O  | 2.64611800  | -5.01846200 | -2.42233000 |
| O  | -3.00595400 | -7.61162500 | -3.88431500 |
| O  | -0.95701700 | -7.80641700 | -2.37679300 |
| Si | 2.74662500  | -6.31482800 | 1.54514300  |
| Si | 0.31580500  | -8.24291700 | 1.55257800  |
| Si | 2.74794700  | -6.31845300 | -1.51534900 |
| Si | 0.31713600  | -8.24655600 | -1.52032200 |
| O  | 1.54576800  | -7.29486700 | 1.89798700  |
| O  | 4.10880400  | -7.06594100 | 1.77942400  |
| O  | 2.67374100  | -5.83845100 | 0.01424900  |
| O  | -0.10728000 | -8.12471700 | 0.01575300  |
| O  | 1.54739800  | -7.29932600 | -1.86690900 |
| O  | 4.11033200  | -7.07011700 | -1.74667200 |
| O  | -4.26517000 | 3.36826200  | -1.76271500 |
| O  | -3.21153600 | 2.50795700  | -3.94001100 |
| O  | -7.35169600 | -1.84530000 | -1.86317900 |
| O  | -7.70254700 | 0.69385200  | -1.88427100 |
| O  | -6.68918300 | -0.44889400 | -3.95598500 |
| Si | -3.65523200 | -0.44703900 | -6.14280000 |
| Si | -3.05249100 | 2.48547600  | -5.51449600 |
| Si | -6.70442600 | -0.50968300 | -5.52243200 |
| O  | -2.97312300 | 0.99066700  | -6.04747400 |
| O  | -5.23516100 | -0.30454800 | -6.07085900 |
| O  | -7.26632300 | -1.90328700 | -6.03202300 |
| Si | -3.05727800 | 2.49855400  | 5.51839300  |
| Si | -6.70922400 | -0.49655500 | 5.53026300  |
| Si | -3.66061800 | -0.43261400 | 6.15320800  |
| O  | -2.97836600 | 1.00498500  | 6.05500700  |
| O  | -7.27161600 | -1.88895600 | 6.04266500  |
| O  | -5.24040600 | -0.29018600 | 6.07944800  |
| Si | -5.62871800 | 4.12344900  | 1.52914100  |
| Si | -8.05951600 | 2.19539200  | 1.53657600  |
| Si | -5.62737900 | 4.11985900  | -1.53134600 |
| Si | -8.05824300 | 2.19175800  | -1.53638200 |
| O  | -6.82955800 | 3.14344200  | 1.88199600  |
| O  | -5.73133200 | 5.42565200  | 2.43295700  |

|    |             |             |             |
|----|-------------|-------------|-------------|
| O  | -5.70158200 | 4.59986400  | -0.00174900 |
| O  | -8.48262600 | 2.31358800  | -0.00024300 |
| O  | -6.82793000 | 3.13898000  | -1.88290100 |
| O  | -5.72923100 | 5.41987500  | -2.43832900 |
| Si | -7.35617300 | -3.38767900 | 1.54922900  |
| Si | -7.35486400 | -3.39134200 | -1.53515000 |
| O  | -6.22395800 | -4.13751200 | 2.36849300  |
| O  | -7.07700400 | -3.62618900 | 0.00740900  |
| O  | -6.22186700 | -4.14315300 | -2.35158000 |
| Si | -5.43372200 | -4.34892800 | 3.73056800  |
| O  | -4.88752400 | -5.83754400 | 3.76996800  |
| O  | -6.41446800 | -4.10965300 | 4.94928200  |
| Si | -7.28027400 | -3.47069900 | 6.10623800  |
| Si | -4.45107600 | -7.20062400 | 4.44588000  |
| Si | -5.43045000 | -4.35780800 | -3.71249400 |
| O  | -4.88426700 | -5.84644800 | -3.74795900 |
| O  | -6.41022700 | -4.12131300 | -4.93259600 |
| Si | -7.27499400 | -3.48515200 | -6.09185300 |
| Si | -4.44723900 | -7.21112600 | -4.42021100 |
| O  | 5.67453400  | -3.00456600 | 3.77119200  |
| O  | 5.67780000  | -3.01348100 | -3.74670200 |
| O  | 6.62054300  | 0.50681300  | 3.88284300  |
| O  | 6.62389800  | 0.49763300  | -3.86585300 |
| O  | 5.64875200  | 3.58815800  | 1.88686800  |
| O  | 5.65038100  | 3.58369600  | -1.87802900 |
| O  | 2.64823400  | 5.83046000  | 1.80330800  |
| O  | 2.64978800  | 5.82618400  | -1.80238000 |
| O  | -1.32868400 | 5.75806400  | 2.35888400  |
| O  | -1.32666600 | 5.75244000  | -2.36124000 |
| Si | -6.08299800 | 6.06569000  | 3.84685500  |
| Si | -6.07966400 | 6.05656800  | -3.85403800 |
| Si | -1.36588000 | 6.57790200  | 3.71938800  |
| Si | -1.36264600 | 6.56909500  | -3.72369400 |
| Si | 6.86625800  | 4.54744900  | 1.53406000  |
| Si | 6.86758200  | 4.54382300  | -1.52643700 |
| Si | 2.90411100  | 7.35872400  | 1.52561500  |
| Si | 2.90543600  | 7.35510400  | -1.52808800 |
| O  | -5.29705600 | 7.45114100  | 3.97095400  |
| O  | -5.29361500 | 7.44171900  | -3.98073800 |
| O  | -0.12079800 | 7.53920300  | 3.79399100  |
| O  | -2.70079500 | 7.43374400  | 3.75519900  |
| O  | -0.11751000 | 7.53020600  | -3.79950300 |
| O  | -2.69753900 | 7.42483800  | -3.76269100 |
| Si | -3.93791500 | 8.15645000  | 4.42791000  |

|    |             |             |             |
|----|-------------|-------------|-------------|
| Si | -3.93407500 | 8.14594800  | -4.43818500 |
| O  | 4.41776800  | 7.71700000  | 1.83364100  |
| O  | 1.94337300  | 8.29940800  | 2.40298400  |
| O  | 2.59517700  | 7.69994300  | -0.00182500 |
| O  | 4.41936000  | 7.71265200  | -1.83565300 |
| O  | 1.94545800  | 8.29370700  | -2.40851300 |
| Si | 1.12290500  | 8.49768200  | 3.75219300  |
| Si | 1.12615500  | 8.48878300  | -3.75889900 |
| O  | 6.42782800  | 6.04045900  | 1.76490000  |
| O  | 8.11388300  | 4.16675500  | 2.44045100  |
| O  | 7.31781000  | 4.37021200  | 0.00416300  |
| O  | 6.42935400  | 6.03627900  | -1.76119800 |
| O  | 8.11599100  | 4.16098500  | -2.43084600 |
| Si | 5.87507900  | 7.38745700  | 2.38056500  |
| Si | 5.87713800  | 7.38181500  | -2.38053200 |
| Si | 8.66039900  | 3.68739100  | 3.85605600  |
| Si | 8.66373600  | 3.67826900  | -3.84483900 |
| Si | 8.08932700  | 0.71329300  | 4.43203000  |
| Si | 8.09315500  | 0.70281200  | -4.41426000 |
| O  | 8.65167200  | 2.10567600  | 3.91962600  |
| O  | 8.65505900  | 2.09640700  | -3.90466900 |
| O  | 9.03358300  | -0.42432000 | 3.81728800  |
| O  | 9.03687800  | -0.43334000 | -3.79600500 |
| Si | 9.49829500  | -1.94070700 | 3.76818600  |
| Si | 9.50155000  | -1.94960500 | -3.74290800 |
| O  | 8.25453300  | -2.89910600 | 3.80998600  |
| O  | 8.25781700  | -2.90810100 | -3.78351100 |
| Si | 7.00944400  | -3.86041100 | 3.73538400  |
| Si | 7.01267000  | -3.86922300 | -3.70771100 |
| O  | 7.04664800  | -4.68024300 | 2.37486900  |
| O  | 7.04869100  | -4.68583600 | -2.34522700 |
| Si | 5.30316700  | -7.89624200 | 2.39842500  |
| Si | 5.30522900  | -7.90188100 | -2.36266900 |
| Si | 7.53460800  | -5.94965600 | 1.55868400  |
| Si | 7.53594300  | -5.95331100 | -1.52561400 |
| O  | 6.68192200  | -7.23337200 | 1.95183600  |
| O  | 6.68359800  | -7.23795700 | -1.91646000 |
| O  | 7.36450300  | -5.62823200 | 0.01602700  |
| H  | -5.35132100 | -8.29089200 | -3.99874100 |
| H  | -5.35479600 | -8.28138400 | 4.02618600  |
| H  | -8.68124600 | -3.90063000 | 5.99076400  |
| H  | -8.68582700 | -3.89917800 | 1.91153000  |
| H  | -8.68416900 | -3.90369700 | -1.89738500 |
| H  | -8.67606600 | -3.91480500 | -5.97657100 |



|   |             |             |             |
|---|-------------|-------------|-------------|
| H | -6.76902200 | -3.93105700 | -7.39801400 |
| H | -6.77543300 | -3.91350800 | 7.41389200  |
| H | -7.57604800 | 0.54787800  | 6.09465300  |
| H | -7.57083800 | 0.53339200  | -6.09004100 |
| H | -9.23295600 | 2.60237500  | 2.32292300  |
| H | -9.23093100 | 2.59687300  | -2.32464400 |
| H | -7.51873000 | 6.37617500  | 3.90316300  |
| H | -7.51534800 | 6.36691700  | -3.91232200 |
| H | -5.67457200 | 5.14083000  | -4.93024600 |
| H | -4.01099100 | 9.53816500  | 3.93148600  |
| H | -3.79152400 | 8.13895700  | 5.89049600  |
| H | -4.00758200 | 9.52883300  | -3.94510100 |
| H | -3.78642300 | 8.12498800  | -5.90059900 |
| H | -5.67883700 | 5.15250700  | 4.92558200  |
| H | -4.20088500 | 3.15523300  | -6.14183900 |
| H | -1.80184500 | 3.13327700  | -5.93530800 |
| H | -4.20617800 | 3.16983800  | 6.14315300  |
| H | -1.80696000 | 3.14729900  | 5.93875300  |
| H | -1.34798000 | 5.64244700  | 4.85319400  |
| H | -1.34377800 | 5.63094500  | -4.85526800 |
| H | 1.99026800  | 8.22238100  | 4.90666200  |
| H | 0.69241900  | 9.90250000  | 3.79768700  |
| H | 0.69571200  | 9.89348900  | -3.80809400 |
| H | 1.99451700  | 8.21075000  | -4.91195900 |
| H | 2.17498600  | 4.49857100  | 3.85529500  |
| H | 2.17832700  | 4.48944300  | -3.85161600 |
| H | 5.82470400  | 7.25552900  | -3.84415700 |
| H | 6.74991100  | 8.49105700  | -1.96973200 |
| H | 6.74820600  | 8.49572200  | 1.96789700  |
| H | 5.82137400  | 7.26463700  | 3.84444000  |
| H | 7.85488600  | 4.28184400  | 4.93247300  |
| H | 10.06137400 | 4.11731900  | 3.97153100  |
| H | 10.06480700 | 4.10792300  | -3.96011800 |
| H | 7.85915100  | 4.27016800  | -4.92335500 |
| H | 4.52881500  | 1.51303300  | 4.88277200  |
| H | 8.07381800  | 0.65969700  | 5.90097400  |
| H | 10.36562800 | -2.21594300 | 4.92269200  |
| H | 10.25609300 | -2.12377800 | 2.52194200  |
| H | 4.53303500  | 1.50147800  | -4.86997700 |
| H | 4.58892100  | -2.31332600 | -5.88460700 |
| H | 10.36987800 | -2.22757400 | -4.89600500 |
| H | 10.25826400 | -2.12972300 | -2.49557600 |
| H | 4.58380600  | -2.29935000 | 5.90649300  |
| H | 8.07891700  | 0.64573500  | -5.88308200 |

|    |             |             |             |
|----|-------------|-------------|-------------|
| H  | 7.03155100  | -4.80736400 | -4.83927800 |
| H  | 8.94081300  | -6.26259900 | -1.82823300 |
| H  | 8.93921700  | -6.25822600 | 1.86325300  |
| H  | 7.02735000  | -4.79586200 | 4.86918700  |
| H  | 5.30931500  | -9.27759800 | 1.89571800  |
| H  | 5.31093900  | -9.28204600 | -1.85668700 |
| H  | 2.69649400  | -5.28580700 | 4.94157800  |
| H  | 2.70078300  | -5.29752200 | -4.91423100 |
| H  | 0.64670300  | -9.63718000 | 1.88034600  |
| H  | 0.64831200  | -9.64159500 | -1.84450000 |
| H  | -0.72721400 | -7.93292700 | 4.89168700  |
| H  | -0.72298800 | -7.94448300 | -4.86105500 |
| H  | -0.79358900 | -4.28537000 | 5.90301100  |
| H  | -0.78840900 | -4.29943400 | -5.88113400 |
| H  | -4.43862000 | -7.05119700 | 5.90821200  |
| H  | -4.43351600 | -7.06516600 | -5.88288200 |
| H  | -3.26449500 | -0.98988800 | 7.45437100  |
| H  | -3.25798100 | -1.00750300 | -7.44237700 |
| H  | 5.17269700  | -7.92849200 | -3.82644400 |
| H  | 5.16936900  | -7.91938300 | 3.86214200  |
| Al | -3.44722800 | -0.35267100 | -1.49582700 |
| Si | -2.87638800 | -2.35658100 | 3.66982000  |
| Si | -3.50530900 | -0.38106900 | 1.49723800  |
| Si | -2.93139400 | 2.48264300  | 2.28026200  |
| Si | -6.56751900 | -0.43741300 | 2.28700200  |
| Si | -2.90743800 | 2.47708800  | -2.27098600 |
| Si | -2.87067700 | -2.35757600 | -3.64451500 |
| Si | -6.56654200 | -0.44161600 | -2.28566600 |
| O  | -2.99708700 | -1.71842900 | 2.23230700  |
| O  | -2.79398000 | 0.90262400  | 2.14032500  |
| O  | -2.90752200 | -0.61430000 | 0.07544900  |
| O  | -5.11535300 | -0.22375500 | 1.64421800  |
| O  | -5.12645400 | -0.25191500 | -1.70001100 |
| O  | -2.72812900 | -1.82901700 | -2.13713100 |
| O  | -2.55973800 | 0.94936200  | -2.10961700 |
| O  | -1.44520000 | -2.98573600 | -3.87842800 |
| O  | -1.43801600 | -2.98571800 | 3.76868800  |
| O  | 0.77933000  | -4.03888400 | -3.92130000 |
| O  | 0.78216500  | -4.03594800 | 3.99131000  |
| O  | 2.98413400  | -2.89966200 | -4.07504500 |
| O  | 4.17796000  | -0.72477600 | -4.03171000 |
| O  | 4.52336800  | 1.10823200  | -2.33520000 |
| O  | 3.01024600  | 3.16051900  | -1.79235300 |
| O  | 0.60578800  | 3.93355100  | -2.13229900 |

|    |             |             |             |
|----|-------------|-------------|-------------|
| O  | -1.76340500 | 3.26547500  | -1.46743700 |
| O  | -1.70960100 | 3.17581800  | 1.52668800  |
| O  | 0.60683500  | 3.92991200  | 2.17095800  |
| O  | 3.00959900  | 3.16907500  | 1.78876000  |
| O  | 2.98780900  | -2.89200600 | 4.08867800  |
| O  | 4.17684400  | -0.71389500 | 4.05255000  |
| O  | 4.51984900  | 1.11640500  | 2.34959500  |
| O  | 4.58102300  | 2.00193100  | 0.00436000  |
| O  | -0.39011900 | 5.01770300  | 0.02220900  |
| Si | -0.68147200 | -4.22572500 | -4.48210100 |
| Si | 2.32999800  | -4.33639500 | -3.92467800 |
| Si | -0.69942500 | -4.19981100 | 4.48479100  |
| Si | 2.32819800  | -4.32689100 | 3.95196400  |
| Si | 4.35850800  | -2.21721300 | 4.51010100  |
| Si | 4.36217500  | -2.22782600 | -4.48885400 |
| Si | 4.92941700  | 0.65147300  | -3.80409900 |
| Si | 4.92592400  | 0.66090300  | 3.81942300  |
| Si | 4.41552700  | 2.45948400  | -1.50864800 |
| Si | 4.41519800  | 2.46283100  | 1.51612300  |
| Si | 2.12937900  | 4.33126900  | 2.45009300  |
| Si | 2.12428600  | 4.32578300  | -2.44322100 |
| Si | -0.73697400 | 4.44238000  | 1.47291300  |
| Si | -0.73738000 | 4.46762200  | -1.44148000 |
| C  | -0.14555700 | -2.21406700 | -0.31996000 |
| H  | 0.21231700  | -3.23726100 | -0.35797600 |
| H  | -0.46814100 | -1.84169400 | 0.64544900  |
| C  | -0.17857300 | -1.41691100 | -1.43314600 |
| H  | -1.41187500 | -1.78274000 | -1.65505800 |
| H  | -0.35241200 | -0.34926400 | -1.31669400 |
| H  | 0.31732700  | -1.75704300 | -2.33899500 |
| O  | -2.17014300 | -3.56489700 | 0.08548000  |
| H  | -2.51405200 | -2.99302600 | 0.78578300  |
| H  | -2.73900700 | -3.35931600 | -0.66516900 |

## TS11

|   |            |             |             |
|---|------------|-------------|-------------|
| O | 4.10313700 | 3.58183300  | -1.75580400 |
| O | 3.08643900 | 2.68615400  | -3.93638100 |
| O | 7.39126400 | -1.50699800 | -1.86469700 |
| O | 7.64262900 | 1.04398300  | -1.87951100 |
| O | 6.67699200 | -0.13252700 | -3.95506900 |
| O | 4.32501400 | -3.12882000 | -3.79702200 |
| O | 3.13202900 | -1.19635000 | -4.98740700 |
| O | 1.44774600 | -5.57619700 | -3.87964000 |

|    |             |             |             |
|----|-------------|-------------|-------------|
| O  | 4.31965900  | -3.13744900 | 3.79665200  |
| O  | 3.12457000  | -1.20816000 | 4.98973600  |
| O  | 1.44216100  | -5.58524800 | 3.86913000  |
| Si | 1.71229800  | -7.14031800 | -3.80846200 |
| Si | 1.70667600  | -7.14918300 | 3.79459500  |
| O  | -2.47436900 | -5.06687500 | -2.44321900 |
| O  | 3.27630000  | -7.43385600 | -3.90435300 |
| O  | 1.23484100  | -7.71209700 | -2.39977200 |
| O  | -2.47796600 | -5.07258300 | 2.42807300  |
| O  | 3.27057700  | -7.44293900 | 3.89214000  |
| O  | 1.23133600  | -7.71767000 | 2.38391900  |
| Si | -2.52637900 | -6.37202700 | -1.53937100 |
| Si | -0.02209800 | -8.20369400 | -1.54587100 |
| Si | -2.52862200 | -6.37559200 | 1.52112100  |
| Si | -0.02435500 | -8.20727300 | 1.52702900  |
| O  | -1.28803500 | -7.30442300 | -1.89175200 |
| O  | -3.85809800 | -7.17578300 | -1.77408700 |
| O  | -2.47269100 | -5.89311200 | -0.00847600 |
| O  | 0.39551200  | -8.06900300 | -0.00890600 |
| O  | -1.29079800 | -7.30880900 | 1.87314300  |
| O  | -3.86068700 | -7.17989000 | 1.75200900  |
| O  | 4.10068200  | 3.57767900  | 1.77043700  |
| O  | 3.08070100  | 2.67695300  | 3.94741000  |
| O  | 7.38846600  | -1.51133700 | 1.87222500  |
| O  | 7.63985900  | 1.03958300  | 1.89331300  |
| O  | 6.67118500  | -0.14180000 | 3.96473200  |
| Si | 3.63871700  | -0.25837900 | 6.15049800  |
| Si | 2.92210600  | 2.64833200  | 5.52184100  |
| Si | 6.68824700  | -0.20189200 | 5.53118800  |
| O  | 2.90100400  | 1.15158300  | 6.05486500  |
| O  | 5.21189900  | -0.05428500 | 6.07909600  |
| O  | 7.30397300  | -1.57246600 | 6.04104100  |
| Si | 2.93021400  | 2.66119500  | -5.51104600 |
| Si | 6.69637000  | -0.18898000 | -5.52150600 |
| Si | 3.64781000  | -0.24419200 | -6.14550800 |
| O  | 2.90989000  | 1.16566400  | -6.04761500 |
| O  | 7.31290000  | -1.55836900 | -6.03364400 |
| O  | 5.22080300  | -0.04016100 | -6.07120900 |
| Si | 5.43483400  | 4.38543600  | -1.52098500 |
| Si | 7.93909300  | 2.55379900  | -1.52748400 |
| Si | 5.43257300  | 4.38190500  | 1.53950200  |
| Si | 7.93689400  | 2.55022800  | 1.54547400  |
| O  | 6.67316200  | 3.45307000  | -1.87337600 |
| O  | 5.48681900  | 5.69062000  | -2.42483000 |

|    |             |             |             |
|----|-------------|-------------|-------------|
| O  | 5.48850200  | 4.86438800  | 0.00990700  |
| O  | 8.35672900  | 2.68848700  | 0.00947500  |
| O  | 6.67040000  | 3.44868100  | 1.89152100  |
| O  | 5.48325200  | 5.68493900  | 2.44645600  |
| Si | 7.45437100  | -3.05248400 | -1.54010600 |
| Si | 7.45213500  | -3.05608600 | 1.54427200  |
| O  | 6.35259500  | -3.84600000 | -2.35972500 |
| O  | 7.18419600  | -3.30166300 | 0.00162900  |
| O  | 6.34908600  | -3.85155100 | 2.36034800  |
| Si | 5.57169300  | -4.08817100 | -3.72206300 |
| O  | 5.08407400  | -5.59698800 | -3.76158000 |
| O  | 6.54276900  | -3.81081300 | -4.94044900 |
| Si | 7.38335800  | -3.13856900 | -6.09713700 |
| Si | 4.70143600  | -6.97609900 | -4.43757400 |
| Si | 5.56618300  | -4.09690700 | 3.72099800  |
| O  | 5.07855400  | -5.60574500 | 3.75634700  |
| O  | 6.53555100  | -3.82227800 | 4.94142700  |
| Si | 7.37440700  | -3.15278300 | 6.10095200  |
| Si | 4.69493100  | -6.98642700 | 4.42851500  |
| O  | -5.58058100 | -3.17873800 | -3.76659500 |
| O  | -5.58611000 | -3.18750600 | 3.75129700  |
| O  | -6.66298900 | 0.29300600  | -3.87874700 |
| O  | -6.66867600 | 0.28397700  | 3.86994800  |
| O  | -5.81299400 | 3.41002900  | -1.88258600 |
| O  | -5.81575600 | 3.40564100  | 1.88230900  |
| O  | -2.90238200 | 5.76782700  | -1.79809800 |
| O  | -2.90502100 | 5.76362100  | 1.80758900  |
| O  | 1.07452100  | 5.85080900  | -2.35229500 |
| O  | 1.07108400  | 5.84527800  | 2.36782800  |
| Si | 5.81370800  | 6.34385600  | -3.83863600 |
| Si | 5.80805600  | 6.33488400  | 3.86225500  |
| Si | 1.08013900  | 6.67142600  | -3.71282700 |
| Si | 1.07466400  | 6.66276300  | 3.73025400  |
| Si | -7.06716400 | 4.32104300  | -1.53024700 |
| Si | -7.06941000 | 4.31747700  | 1.53025000  |
| Si | -3.21785600 | 7.28493800  | -1.52057000 |
| Si | -3.22010000 | 7.28137900  | 1.53313300  |
| O  | 4.97429100  | 7.69754600  | -3.96307600 |
| O  | 4.96845700  | 7.68827900  | 3.98861500  |
| O  | -0.20151700 | 7.58335500  | -3.78790800 |
| O  | 2.38061700  | 7.57875700  | -3.74821800 |
| O  | -0.20709000 | 7.57450700  | 3.80558500  |
| O  | 2.37509800  | 7.56999700  | 3.76967100  |
| Si | 3.58879700  | 8.34921000  | -4.42053600 |

|    |             |             |             |
|----|-------------|-------------|-------------|
| Si | 3.58228800  | 8.33888200  | 4.44555700  |
| O  | -4.74424500 | 7.58380500  | -1.82913700 |
| O  | -2.29429000 | 8.26240100  | -2.39765200 |
| O  | -2.92301700 | 7.63801900  | 0.00696100  |
| O  | -4.74694100 | 7.57952900  | 1.84015700  |
| O  | -2.29782300 | 8.25679400  | 2.41384400  |
| Si | -1.48172500 | 8.49252500  | -3.74658700 |
| Si | -1.48723500 | 8.48377200  | 3.76450400  |
| O  | -6.68730800 | 5.83003100  | -1.76100800 |
| O  | -8.29865100 | 3.89187400  | -2.43705100 |
| O  | -7.51198000 | 4.12635800  | -0.00049800 |
| O  | -6.68989500 | 5.82591900  | 1.76508900  |
| O  | -8.30222600 | 3.88619900  | 2.43424600  |
| Si | -6.18738200 | 7.19756900  | -2.37654900 |
| Si | -6.19087300 | 7.19202100  | 2.38454800  |
| Si | -8.82553400 | 3.39147800  | -3.85282100 |
| Si | -8.83119000 | 3.38250600  | 3.84807200  |
| Si | -8.13852700 | 0.44193600  | -4.42845200 |
| Si | -8.14501600 | 0.43162800  | 4.41783700  |
| O  | -8.75500900 | 1.81130900  | -3.91631100 |
| O  | -8.76075000 | 1.80219300  | 3.90798300  |
| O  | -9.03783900 | -0.73167100 | -3.81398100 |
| O  | -9.04342400 | -0.74054200 | 3.79931100  |
| Si | -9.44298100 | -2.26505000 | -3.76496500 |
| Si | -9.44849700 | -2.27380100 | 3.74612800  |
| O  | -8.16271800 | -3.17413800 | -3.80628700 |
| O  | -8.16828700 | -3.18298400 | 3.78720900  |
| Si | -6.88105500 | -4.08607100 | -3.73120800 |
| Si | -6.88652100 | -4.09473800 | 3.71188600  |
| O  | -6.88668100 | -4.90668300 | -2.37066600 |
| O  | -6.89014400 | -4.91218300 | 2.34943100  |
| Si | -5.01890100 | -8.05212600 | -2.39346000 |
| Si | -5.02239600 | -8.05767200 | 2.36763300  |
| Si | -7.32496700 | -6.19415900 | -1.55458600 |
| Si | -7.32723100 | -6.19775300 | 1.52971100  |
| O  | -6.42265200 | -7.44360200 | -1.94738000 |
| O  | -6.42549200 | -7.44811000 | 1.92091500  |
| O  | -7.16808300 | -5.86628000 | -0.01188600 |
| H  | 5.64064700  | -8.03007000 | 4.00741100  |
| H  | 5.64653700  | -8.02071900 | -4.01751500 |
| H  | 8.80001400  | -3.51344300 | -5.98115700 |
| H  | 8.80311700  | -3.51166900 | -1.90192200 |
| H  | 8.80031300  | -3.51611300 | 1.90699200  |
| H  | 8.79123200  | -3.52738400 | 5.98617600  |

|   |              |             |             |
|---|--------------|-------------|-------------|
| H | 6.88578400   | -3.61806500 | 7.40695900  |
| H | 6.89665300   | -3.60080500 | -7.40494400 |
| H | 7.52193200   | 0.88849500  | -6.08564700 |
| H | 7.51305600   | 0.87425100  | 6.09904500  |
| H | 9.09601300   | 3.00628000  | -2.31344400 |
| H | 9.09258900   | 3.00086800  | 2.33412100  |
| H | 7.23623500   | 6.71018400  | -3.89446400 |
| H | 7.23050100   | 6.70107900  | 3.92102100  |
| H | 5.43866900   | 5.40406000  | 4.93836800  |
| H | 3.60767300   | 9.73274300  | -3.92415500 |
| H | 3.44370800   | 8.32596100  | -5.88317200 |
| H | 3.60189300   | 9.72356500  | 3.95243100  |
| H | 3.43505900   | 8.31222300  | 5.90792100  |
| H | 5.44590000   | 5.41554500  | -4.91745900 |
| H | 4.04324500   | 3.36245800  | 6.14954900  |
| H | 1.64696500   | 3.24680200  | 5.94218900  |
| H | 4.05223400   | 3.37682200  | -6.13544100 |
| H | 1.65565700   | 3.26059100  | -5.93187100 |
| H | 1.09918500   | 5.73594500  | -4.84659200 |
| H | 1.09206100   | 5.72463300  | 4.86186800  |
| H | -2.33727000  | 8.18351200  | -4.90134200 |
| H | -1.10642400  | 9.91308400  | -3.79200100 |
| H | -1.11200700  | 9.90422300  | 3.81377900  |
| H | -2.34447600  | 8.17207400  | 4.91727700  |
| H | -2.37675700  | 4.45536600  | -3.84985600 |
| H | -2.38241800  | 4.44638900  | 3.85705300  |
| H | -6.13405500  | 7.06793200  | 3.84819700  |
| H | -7.10616600  | 8.26631100  | 1.97339100  |
| H | -7.10327600  | 8.27089900  | -1.96423700 |
| H | -6.12841200  | 7.07688900  | -3.84039800 |
| H | -8.04348200  | 4.01690300  | -4.92898800 |
| H | -10.24219300 | 3.76635100  | -3.96880200 |
| H | -10.24801400 | 3.75711000  | 3.96284600  |
| H | -8.05071300  | 4.00542000  | 4.92683800  |
| H | -4.61181300  | 1.38012700  | -4.87800100 |
| H | -8.12042500  | 0.38893500  | -5.89738700 |
| H | -10.29849900 | -2.57399600 | -4.91975700 |
| H | -10.19348300 | -2.47753800 | -2.51897500 |
| H | -4.61896900  | 1.36876300  | 4.87474600  |
| H | -4.52615400  | -2.44527700 | 5.88954400  |
| H | -10.30570600 | -2.58543500 | 4.89893800  |
| H | -10.19716400 | -2.48338500 | 2.49854300  |
| H | -4.51749100  | -2.43153100 | -5.90155400 |
| H | -8.12907100  | 0.37520300  | 5.88666700  |

|    |             |             |             |
|----|-------------|-------------|-------------|
| H  | -6.86913700 | -5.03286100 | 4.84349300  |
| H  | -8.71905300 | -6.56166900 | 1.83185900  |
| H  | -8.71634500 | -6.55736800 | -1.85962700 |
| H  | -6.86201400 | -5.02154700 | -4.86497100 |
| H  | -4.97126200 | -9.43265000 | -1.89068800 |
| H  | -4.97401600 | -9.43702500 | 1.86171700  |
| H  | -2.51530000 | -5.34195400 | -4.93583900 |
| H  | -2.52255400 | -5.35347600 | 4.91996800  |
| H  | -0.29816800 | -9.60983000 | -1.87368500 |
| H  | -0.30089800 | -9.61417100 | 1.85116100  |
| H  | 1.00917700  | -7.85331800 | -4.88463400 |
| H  | 1.00201600  | -7.86468300 | 4.86810600  |
| H  | 0.93337500  | -4.20598800 | -5.89611400 |
| H  | 0.92465200  | -4.21982500 | 5.88802900  |
| H  | 4.68366200  | -6.82732500 | -5.89991900 |
| H  | 4.67500900  | -6.84106300 | 5.89117500  |
| H  | 3.27421000  | -0.81655900 | -7.44678100 |
| H  | 3.26321000  | -0.83388500 | 7.44996400  |
| H  | -4.88943500 | -8.07903200 | 3.83145600  |
| H  | -4.88379200 | -8.07007500 | -3.85713000 |
| Al | 3.47316400  | -0.26614900 | 1.41848400  |
| Si | 2.92841800  | -2.17140500 | -3.65192800 |
| Si | 3.51184000  | -0.18134500 | -1.48464700 |
| Si | 2.80262500  | 2.65388600  | -2.23286600 |
| Si | 6.56993000  | -0.13511600 | -2.29659800 |
| Si | 2.80241100  | 2.59212100  | 2.24849600  |
| Si | 2.92306800  | -2.19844400 | 3.65339400  |
| Si | 6.55394400  | -0.13676300 | 2.29958500  |
| O  | 2.72635200  | -1.07488600 | -2.53777400 |
| O  | 2.79695500  | 1.24625200  | -1.49069300 |
| O  | 3.29112800  | -0.96760800 | -0.13295100 |
| O  | 5.07753800  | 0.02363100  | -1.79399800 |
| O  | 5.10832500  | 0.02527000  | 1.74018800  |
| O  | 2.74754000  | -1.67469900 | 2.15959200  |
| O  | 2.54688800  | 1.08677800  | 1.84662300  |
| O  | 1.52287100  | -2.88220300 | 3.89138200  |
| O  | 1.55531200  | -2.93530300 | -3.72292600 |
| O  | -0.65104500 | -4.04106500 | 3.91950600  |
| O  | -0.64835700 | -4.01532400 | -3.97821400 |
| O  | -2.89829600 | -2.96890100 | 4.08505500  |
| O  | -4.17783900 | -0.84192300 | 4.03834500  |
| O  | -4.59512100 | 0.97314800  | 2.33972300  |
| O  | -3.16637100 | 3.08628700  | 1.79923700  |
| O  | -0.79740300 | 3.94920400  | 2.13076000  |



|    |             |             |             |
|----|-------------|-------------|-------------|
| O  | 1.59705400  | 3.36760900  | 1.52835200  |
| O  | 1.49776500  | 3.32683700  | -1.64432200 |
| O  | -0.84224800 | 3.95940400  | -2.11215600 |
| O  | -3.19122200 | 3.06643200  | -1.82841000 |
| O  | -2.90080900 | -2.96297900 | -4.08101500 |
| O  | -4.16560100 | -0.82903800 | -4.06047100 |
| O  | -4.62197800 | 0.95084000  | -2.32947700 |
| O  | -4.68779700 | 1.86238700  | 0.00342500  |
| O  | 0.19357800  | 5.08283900  | -0.00008200 |
| Si | 0.81290800  | -4.15079300 | 4.49130800  |
| Si | -2.19246900 | -4.37873500 | 3.93153500  |
| Si | 0.83981900  | -4.12686600 | -4.47730500 |
| Si | -2.18220100 | -4.36846500 | -3.94732100 |
| Si | -4.29562100 | -2.34086200 | -4.50606700 |
| Si | -4.30248600 | -2.35028800 | 4.49455100  |
| Si | -4.98139400 | 0.50392000  | 3.80930800  |
| Si | -4.97670300 | 0.50841200  | -3.81680300 |
| Si | -4.53948500 | 2.32861000  | 1.51509900  |
| Si | -4.55780500 | 2.31091700  | -1.51376000 |
| Si | -2.36091900 | 4.28337900  | -2.44798700 |
| Si | -2.32440000 | 4.28462100  | 2.44868600  |
| Si | 0.49502300  | 4.53840000  | -1.46866800 |
| Si | 0.53703300  | 4.53031900  | 1.46229900  |
| C  | 0.54211000  | -2.59139000 | -0.27537400 |
| H  | 0.33670600  | -3.64746400 | -0.40951100 |
| H  | 0.81777500  | -2.04696200 | -1.17276600 |
| C  | 0.40115700  | -1.96827100 | 0.94785200  |
| H  | 1.58258700  | -1.98318400 | 1.42380800  |
| H  | 0.29695300  | -0.88296200 | 0.93539600  |
| H  | -0.12540200 | -2.50273100 | 1.73888300  |
| O  | 2.76588000  | -3.44915600 | -0.92104900 |
| H  | 3.11850900  | -2.65584300 | -0.47544400 |
| C  | 3.37281800  | -4.62018600 | -0.37884200 |
| H  | 3.32022500  | -5.38782300 | -1.15652500 |
| H  | 4.43378700  | -4.42773400 | -0.17232800 |
| C  | 2.65756400  | -5.08663500 | 0.87454800  |
| H  | 3.13950500  | -5.97581700 | 1.29454500  |
| H  | 2.65959300  | -4.30332400 | 1.63709800  |
| H  | 1.61803000  | -5.34795400 | 0.65390300  |

## TS12

|   |            |            |             |
|---|------------|------------|-------------|
| O | 4.36485600 | 3.27907400 | -1.75922000 |
| O | 3.29519500 | 2.44082500 | -3.93729400 |

|    |             |             |             |
|----|-------------|-------------|-------------|
| O  | 7.35085600  | -1.99279400 | -1.86356300 |
| O  | 7.75036900  | 0.53919100  | -1.88269900 |
| O  | 6.71543700  | -0.58223400 | -3.95534300 |
| O  | 4.19311100  | -3.43621900 | -3.79001100 |
| O  | 3.11331400  | -1.43933600 | -4.98218900 |
| O  | 1.17807100  | -5.71192600 | -3.86563700 |
| O  | 4.19606400  | -3.43298500 | 3.80344100  |
| O  | 3.11683100  | -1.43552700 | 4.99487900  |
| O  | 1.18090500  | -5.70879600 | 3.88305500  |
| Si | 1.35114800  | -7.28869500 | -3.79227000 |
| Si | 1.35392700  | -7.28562400 | 3.81083100  |
| O  | -2.70604500 | -4.97282100 | -2.42582000 |
| O  | 2.89528100  | -7.67298400 | -3.88937800 |
| O  | 0.84283600  | -7.82954300 | -2.38216200 |
| O  | -2.70426400 | -4.97085300 | 2.44548000  |
| O  | 2.89813300  | -7.66983300 | 3.90712200  |
| O  | 0.84458600  | -7.82761100 | 2.40153500  |
| Si | -2.83293400 | -6.27134600 | -1.51984800 |
| Si | -0.43960600 | -8.24578500 | -1.52612800 |
| Si | -2.83181600 | -6.27011000 | 1.54065100  |
| Si | -0.43848200 | -8.24454200 | 1.54677300  |
| O  | -1.65141200 | -7.27482900 | -1.87207600 |
| O  | -4.20947900 | -6.99652300 | -1.75185300 |
| O  | -2.74965900 | -5.79403800 | 0.01022700  |
| O  | -0.01306700 | -8.13330700 | 0.01017200  |
| O  | -1.65003600 | -7.27330600 | 1.89282400  |
| O  | -4.20819300 | -6.99509700 | 1.77424700  |
| O  | 4.36617700  | 3.28039300  | 1.76701200  |
| O  | 3.29803800  | 2.44406600  | 3.94653900  |
| O  | 7.35220200  | -1.99128200 | 1.87349400  |
| O  | 7.75181100  | 0.54073300  | 1.89024000  |
| O  | 6.71838700  | -0.57903500 | 3.96456300  |
| Si | 3.68681700  | -0.51548900 | 6.15364200  |
| Si | 3.13997100  | 2.42707000  | 5.52115500  |
| Si | 6.73368200  | -0.63768200 | 5.53098000  |
| O  | 3.03228000  | 0.93489600  | 6.05660000  |
| O  | 5.26908300  | -0.40346000 | 6.08022300  |
| O  | 7.26912800  | -2.04100600 | 6.04235000  |
| Si | 3.13593500  | 2.42262300  | -5.51174300 |
| Si | 6.72965600  | -0.64210600 | -5.52172200 |
| Si | 3.68233800  | -0.52058600 | -6.14235100 |
| O  | 3.02790600  | 0.93000200  | -6.04591100 |
| O  | 7.26478000  | -2.04585900 | -6.03234600 |
| O  | 5.26462500  | -0.40842000 | -6.07007500 |

|    |             |             |             |
|----|-------------|-------------|-------------|
| Si | 5.74138800  | 4.00412000  | -1.52711700 |
| Si | 8.13469900  | 2.02971300  | -1.53340500 |
| Si | 5.74249000  | 4.00540000  | 1.53336300  |
| Si | 8.13582200  | 2.03095800  | 1.53948600  |
| O  | 6.92288900  | 3.00067200  | -1.87936700 |
| O  | 5.86825600  | 5.30268300  | -2.43310100 |
| O  | 5.82464800  | 4.48146500  | 0.00294100  |
| O  | 8.56124400  | 2.14219200  | 0.00288200  |
| O  | 6.92427200  | 3.00218900  | 1.88553700  |
| O  | 5.87004400  | 5.30464800  | 2.43818900  |
| Si | 7.32423200  | -3.53882600 | -1.53659000 |
| Si | 7.32534700  | -3.53757700 | 1.54772400  |
| O  | 6.17713600  | -4.26806800 | -2.35375900 |
| O  | 7.04178100  | -3.76949500 | 0.00583000  |
| O  | 6.17885600  | -4.26617000 | 2.36634500  |
| Si | 5.38186900  | -4.46641600 | -3.71487000 |
| O  | 4.80714600  | -5.94432300 | -3.75147400 |
| O  | 6.36603700  | -4.24794100 | -4.93473500 |
| Si | 7.24299900  | -3.62757400 | -6.09340300 |
| Si | 4.34404100  | -7.29983200 | -4.42485800 |
| Si | 5.38454300  | -4.46346800 | 3.72820400  |
| O  | 4.80989200  | -5.94128200 | 3.76643000  |
| O  | 6.36965600  | -4.24394300 | 4.94716600  |
| Si | 7.24746200  | -3.62264700 | 6.10469600  |
| Si | 4.34728300  | -7.29624800 | 4.44123900  |
| O  | -5.69854200 | -2.90896900 | -3.74886000 |
| O  | -5.69579100 | -2.90593100 | 3.76904000  |
| O  | -6.57701600 | 0.61975600  | -3.86536500 |
| O  | -6.57418200 | 0.62288700  | 3.88333500  |
| O  | -5.54457300 | 3.68501300  | -1.87508000 |
| O  | -5.54319700 | 3.68653100  | 1.88981900  |
| O  | -2.50147300 | 5.86938600  | -1.79747300 |
| O  | -2.50015400 | 5.87084200  | 1.80822500  |
| O  | 1.47286300  | 5.71972800  | -2.35607100 |
| O  | 1.47459200  | 5.72163700  | 2.36403000  |
| Si | 6.23098800  | 5.93361200  | -3.84829300 |
| Si | 6.23380400  | 5.93672700  | 3.85260500  |
| Si | 1.52469200  | 6.53654500  | -3.71791700 |
| Si | 1.52741600  | 6.53955200  | 3.72518300  |
| Si | -6.74313800 | 4.66807200  | -1.52283900 |
| Si | -6.74201700 | 4.66930700  | 1.53766000  |
| Si | -2.72771200 | 7.40272200  | -1.52201100 |
| Si | -2.72659300 | 7.40395400  | 1.53168700  |
| O  | 5.47170400  | 7.33370800  | -3.97398300 |

|    |             |             |             |
|----|-------------|-------------|-------------|
| O  | 5.47461300  | 7.33692100  | 3.97771500  |
| O  | 0.29824000  | 7.52147300  | -3.79306600 |
| O  | 2.87576800  | 7.36653000  | -3.75614600 |
| O  | 0.30101700  | 7.52454100  | 3.80043300  |
| O  | 2.87851600  | 7.36956500  | 3.76175100  |
| Si | 4.12598900  | 8.06427500  | -4.43098700 |
| Si | 4.12922900  | 8.06785900  | 4.43511300  |
| O  | -4.23446000 | 7.78952300  | -1.82941600 |
| O  | -1.74980300 | 8.32338900  | -2.40164000 |
| O  | -2.41102700 | 7.74035600  | 0.00463500  |
| O  | -4.23312200 | 7.79100600  | 1.83988300  |
| O  | -1.74804400 | 8.32533200  | 2.40985800  |
| Si | -0.92678600 | 8.50373200  | -3.75181400 |
| Si | -0.92403800 | 8.50676600  | 3.75928200  |
| O  | -6.27629800 | 6.15201700  | -1.75640800 |
| O  | -7.99858900 | 4.30998500  | -2.42763500 |
| O  | -7.19675600 | 4.50196000  | 0.00769500  |
| O  | -6.27500800 | 6.15343900  | 1.76969000  |
| O  | -7.99680800 | 4.31195300  | 2.44366500  |
| Si | -5.69828400 | 7.48717300  | -2.37465900 |
| Si | -5.69654100 | 7.48909500  | 2.38644100  |
| Si | -8.55537600 | 3.83897000  | -3.84204100 |
| Si | -8.55256300 | 3.84208400  | 3.85885700  |
| Si | -8.04201100 | 0.85354500  | -4.41372100 |
| Si | -8.03877600 | 0.85711700  | 4.43257700  |
| O  | -8.57708600 | 2.25728200  | -3.90309300 |
| O  | -8.57422400 | 2.26044300  | 3.92120400  |
| O  | -9.00744200 | -0.26474500 | -3.79641800 |
| O  | -9.00465600 | -0.26167000 | 3.81688100  |
| Si | -9.50115700 | -1.77184500 | -3.74452900 |
| Si | -9.49841300 | -1.76881100 | 3.76657000  |
| O  | -8.27606900 | -2.75402700 | -3.78578200 |
| O  | -8.27328800 | -2.75095900 | 3.80772100  |
| Si | -7.04961300 | -3.73895500 | -3.71063000 |
| Si | -7.04689400 | -3.73594600 | 3.73247000  |
| O  | -7.10144300 | -4.55577000 | -2.34877900 |
| O  | -7.09971600 | -4.55386300 | 2.37131800  |
| Si | -5.42008100 | -7.80470200 | -2.36858300 |
| Si | -5.41834000 | -7.80277700 | 2.39251500  |
| Si | -7.61302700 | -5.81428400 | -1.53018500 |
| Si | -7.61189900 | -5.81303800 | 1.55411400  |
| O  | -6.78548200 | -7.11476100 | -1.92196200 |
| O  | -6.78406700 | -7.11320100 | 1.94633600  |
| O  | -7.43551300 | -5.49374800 | 0.01182000  |

|   |              |             |             |
|---|--------------|-------------|-------------|
| H | 5.23011200   | -8.39384900 | 4.02077800  |
| H | 5.22717700   | -8.39709000 | -4.00415500 |
| H | 8.63555100   | -4.08415600 | -5.97835000 |
| H | 8.64350600   | -4.07635000 | -1.89913300 |
| H | 8.64490200   | -4.07481100 | 1.90976400  |
| H | 8.63992800   | -4.07932000 | 5.98899300  |
| H | 6.73409000   | -4.05668600 | 7.41196900  |
| H | 6.72867300   | -4.06267000 | -7.39994800 |
| H | 7.61592200   | 0.38459400  | -6.08846500 |
| H | 7.62043700   | 0.38946600  | 6.09624000  |
| H | 9.31508400   | 2.41283900  | -2.32133300 |
| H | 9.31678900   | 2.41471000  | 2.32622400  |
| H | 7.67237400   | 6.21636900  | -3.90623300 |
| H | 7.67523200   | 6.21952900  | 3.90925700  |
| H | 5.81207900   | 5.03064000  | 4.93059200  |
| H | 4.22599900   | 9.44511400  | -3.93682700 |
| H | 3.97808700   | 8.04728700  | -5.89342800 |
| H | 4.22888100   | 9.44829500  | 3.93976400  |
| H | 3.98240200   | 8.05205100  | 5.89767400  |
| H | 5.80847500   | 5.02665900  | -4.92524100 |
| H | 4.30152600   | 3.07562700  | 6.14651800  |
| H | 1.90233400   | 3.09945100  | 5.94191800  |
| H | 4.29700300   | 3.07072400  | -6.13848200 |
| H | 1.89796100   | 3.09459800  | -5.93215000 |
| H | 1.48789100   | 5.59982000  | -4.85021300 |
| H | 1.49144100   | 5.60374400  | 4.85825800  |
| H | -1.80022400  | 8.24332100  | -4.90515500 |
| H | -0.46943100  | 9.89994700  | -3.79989000 |
| H | -0.46665100  | 9.90302100  | 3.80589600  |
| H | -1.79663300  | 8.24728800  | 4.91347100  |
| H | -2.05557600  | 4.52540900  | -3.84770300 |
| H | -2.05275900  | 4.52852500  | 3.85921200  |
| H | -5.64533900  | 7.36413900  | 3.85022300  |
| H | -6.54818000  | 8.61424900  | 1.97456100  |
| H | -6.54962100  | 8.61265700  | -1.96306900 |
| H | -5.64815100  | 7.36103100  | -3.83837900 |
| H | -7.73947600  | 4.41613900  | -4.92004100 |
| H | -9.94792800  | 4.29555000  | -3.95709600 |
| H | -9.94502700  | 4.29875600  | 3.97455900  |
| H | -7.73587200  | 4.42011900  | 4.93579300  |
| H | -4.46716500  | 1.58402400  | -4.86855000 |
| H | -8.02874100  | 0.79733800  | -5.88258900 |
| H | -10.37456300 | -2.03219200 | -4.89790800 |
| H | -10.26130600 | -1.93835500 | -2.49739300 |

|    |              |             |             |
|----|--------------|-------------|-------------|
| H  | -4.46359800  | 1.58796500  | 4.88420100  |
| H  | -4.59190700  | -2.22344900 | 5.90496200  |
| H  | -10.37097300 | -2.02822500 | 4.92079700  |
| H  | -10.25947300 | -1.93632900 | 2.52012600  |
| H  | -4.59621800  | -2.22821200 | -5.88614200 |
| H  | -8.02443000  | 0.80209800  | 5.90147400  |
| H  | -7.08286500  | -4.67175900 | 4.86554500  |
| H  | -9.02220200  | -6.09480000 | 1.85833800  |
| H  | -9.02355300  | -6.09629100 | -1.83315000 |
| H  | -7.08641900  | -4.67568000 | -4.84292400 |
| H  | -5.45234900  | -9.18488900 | -1.86366800 |
| H  | -5.45097600  | -9.18337400 | 1.88874100  |
| H  | -2.76582900  | -5.24884200 | -4.91795500 |
| H  | -2.76222600  | -5.24485800 | 4.93787900  |
| H  | -0.79749200  | -9.63395200 | -1.85140800 |
| H  | -0.79612800  | -9.63244800 | 1.87343900  |
| H  | 0.60643700   | -7.96116600 | -4.86655100 |
| H  | 0.61000200   | -7.95722700 | 4.88620000  |
| H  | 0.74203700   | -4.31714500 | -5.88372800 |
| H  | 0.74634600   | -4.31238300 | 5.90033700  |
| H  | 4.33325600   | -7.15250600 | -5.88741600 |
| H  | 4.33756700   | -7.14774000 | 5.90368600  |
| H  | 3.27450600   | -1.07220900 | -7.44231700 |
| H  | 3.27994900   | -1.06618700 | 7.45444800  |
| H  | -5.28514100  | -7.82961700 | 3.85622400  |
| H  | -5.28795500  | -7.83272200 | -3.83236700 |
| Al | 3.52093600   | -0.44554700 | 1.52295200  |
| Si | 2.87151700   | -2.41741500 | -3.64220000 |
| Si | 3.53268500   | -0.44915300 | -1.49622100 |
| Si | 3.01503900   | 2.41622700  | -2.27599700 |
| Si | 6.59190000   | -0.57529300 | -2.27286000 |
| Si | 3.00150900   | 2.40063200  | 2.27770200  |
| Si | 2.87615300   | -2.39812900 | 3.62057100  |
| Si | 6.58783800   | -0.56704100 | 2.28414700  |
| O  | 2.99653800   | -1.77168200 | -2.21116400 |
| O  | 2.83645600   | 0.83433100  | -2.16666800 |
| O  | 2.85633100   | -0.55974900 | -0.06836400 |
| O  | 5.14193400   | -0.33015700 | -1.61428300 |
| O  | 5.21110000   | -0.25761400 | 1.59279700  |
| O  | 2.92086100   | -1.90393400 | 2.13875200  |
| O  | 2.63100100   | 0.88259600  | 2.11161600  |
| O  | 1.41874600   | -2.98296500 | 3.85144400  |
| O  | 1.41915300   | -3.02374600 | -3.74909600 |
| O  | -0.80854300  | -4.04447000 | 3.96677900  |

|    |             |             |             |
|----|-------------|-------------|-------------|
| O  | -0.82229500 | -4.02203400 | -3.96775800 |
| O  | -3.00087100 | -2.84834900 | 4.07235600  |
| O  | -4.15279700 | -0.65342900 | 4.03395500  |
| O  | -4.45920400 | 1.18657500  | 2.34710100  |
| O  | -2.91029000 | 3.21519100  | 1.80385600  |
| O  | -0.49000500 | 3.93885500  | 2.13775700  |
| O  | 1.86391400  | 3.21125000  | 1.47632400  |
| O  | 1.79967500  | 3.12022900  | -1.52024700 |
| O  | -0.49351500 | 3.92978800  | -2.16202300 |
| O  | -2.90895800 | 3.21298600  | -1.78297400 |
| O  | -3.01243600 | -2.84848200 | -4.05137400 |
| O  | -4.15772400 | -0.65356100 | -4.00995900 |
| O  | -4.45794800 | 1.19385300  | -2.33313900 |
| O  | -4.50042800 | 2.07675800  | 0.01035900  |
| O  | 0.53082000  | 4.99507800  | -0.01348800 |
| Si | 0.67271200  | -4.21443300 | 4.49076600  |
| Si | -2.35755800 | -4.29818000 | 3.94972700  |
| Si | 0.65814600  | -4.22340300 | -4.46491200 |
| Si | -2.37187100 | -4.29735700 | -3.92923800 |
| Si | -4.36725000 | -2.15016900 | -4.48869200 |
| Si | -4.35822100 | -2.15270000 | 4.50747800  |
| Si | -4.87638200 | 0.74001900  | 3.82097700  |
| Si | -4.88078800 | 0.74245600  | -3.80178900 |
| Si | -4.32649900 | 2.54074500  | 1.52503800  |
| Si | -4.32846200 | 2.54296600  | -1.50104000 |
| Si | -2.00593200 | 4.36257800  | -2.44207100 |
| Si | -1.99656800 | 4.36409300  | 2.45184800  |
| Si | 0.86286800  | 4.41558400  | -1.46389000 |
| Si | 0.87058900  | 4.43806900  | 1.45190600  |
| H  | 1.69102400  | -2.67493800 | 0.34038500  |
| C  | 0.73488600  | -2.30012700 | -0.03256800 |
| H  | 0.55428500  | -2.67631500 | -1.03910900 |
| H  | -0.01902000 | -2.67170900 | 0.66690100  |
| C  | 0.78358100  | -0.82017000 | 0.01736400  |
| H  | 0.73444500  | -0.20592500 | -0.86990700 |
| H  | 0.84450100  | -0.28910100 | 0.95820500  |
| O  | -1.31165500 | -0.45050100 | 0.14117700  |
| C  | -2.15260200 | -1.01239000 | -0.89215300 |
| H  | -2.19487900 | -0.26115900 | -1.68161400 |
| H  | -1.67631400 | -1.91365500 | -1.29487100 |
| C  | -3.53735400 | -1.32750400 | -0.36643600 |
| H  | -4.02077800 | -0.43389100 | 0.03309300  |
| H  | -4.15384600 | -1.71383300 | -1.18259400 |
| H  | -3.49649300 | -2.09877900 | 0.41191200  |

|   |             |             |            |
|---|-------------|-------------|------------|
| H | -1.60752800 | -0.79196900 | 0.99413600 |
|---|-------------|-------------|------------|

## TS13

|    |             |             |             |
|----|-------------|-------------|-------------|
| O  | -4.29940300 | 3.34872700  | 1.75937400  |
| O  | -3.24561200 | 2.50096000  | 3.94149400  |
| O  | -7.36094100 | -1.87947400 | 1.87224500  |
| O  | -7.72410000 | 0.65802200  | 1.88405900  |
| O  | -6.70892700 | -0.47266300 | 3.96144900  |
| O  | -4.22754300 | -3.36294700 | 3.80801400  |
| O  | -3.12126300 | -1.37864300 | 4.99685800  |
| O  | -1.24562100 | -5.68151200 | 3.89490500  |
| O  | -4.21742400 | -3.37968100 | -3.78564200 |
| O  | -3.10752400 | -1.40108300 | -4.98026000 |
| O  | -1.23516400 | -5.69882800 | -3.85384600 |
| Si | -1.44118700 | -7.25582000 | 3.82534400  |
| Si | -1.43078600 | -7.27278800 | -3.77769400 |
| O  | 2.65117300  | -5.00201600 | 2.45998900  |
| O  | -2.99084400 | -7.61765400 | 3.92073700  |
| O  | -0.93826500 | -7.80762700 | 2.41755100  |
| O  | 2.65783300  | -5.01291600 | -2.41129100 |
| O  | -2.98022000 | -7.63504800 | -3.87573600 |
| O  | -0.93175300 | -7.81830000 | -2.36612800 |
| Si | 2.76097200  | -6.30461800 | 1.55763500  |
| Si | 0.33954300  | -8.24448800 | 1.56486800  |
| Si | 2.76513800  | -6.31144600 | -1.50284900 |
| Si | 0.34373200  | -8.25134300 | -1.50802400 |
| O  | 1.56456600  | -7.29011000 | 1.91040800  |
| O  | 4.12656700  | -7.04885600 | 1.79395900  |
| O  | 2.68718900  | -5.83020600 | 0.02617500  |
| O  | -0.08269000 | -8.12995700 | 0.02753200  |
| O  | 1.56969500  | -7.29850900 | -1.85447700 |
| O  | 4.13137300  | -7.05672200 | -1.73212800 |
| O  | -4.29472900 | 3.34080800  | -1.76685800 |
| O  | -3.23491800 | 2.48335200  | -3.94227800 |
| O  | -7.35579400 | -1.88779400 | -1.86466800 |
| O  | -7.71895800 | 0.64960000  | -1.88875500 |
| O  | -6.69814000 | -0.49037900 | -3.95833300 |
| Si | -3.66221500 | -0.47607400 | -6.14236100 |
| Si | -3.07430900 | 2.45999300  | -5.51659100 |
| Si | -6.71164100 | -0.55288500 | -5.52472900 |
| O  | -2.98718800 | 0.96503000  | -6.04792200 |
| O  | -5.24288300 | -0.34118700 | -6.07202100 |
| O  | -7.26628800 | -1.94973600 | -6.03336700 |



|    |             |             |             |
|----|-------------|-------------|-------------|
| Si | -3.08935200 | 2.48461700  | 5.51626800  |
| Si | -6.72671300 | -0.52819100 | 5.52793800  |
| Si | -3.67903000 | -0.44878200 | 6.15361500  |
| O  | -3.00368100 | 0.99201200  | 6.05452800  |
| O  | -7.28280600 | -1.92277000 | 6.04128800  |
| O  | -5.25942300 | -0.31411000 | 6.07825400  |
| Si | -5.66497000 | 4.09281300  | 1.52294700  |
| Si | -8.08637800 | 2.15297300  | 1.53017900  |
| Si | -5.66078600 | 4.08602000  | -1.53753200 |
| Si | -8.08224800 | 2.14612300  | -1.54277100 |
| O  | -6.86136100 | 3.10735200  | 1.87573000  |
| O  | -5.77474500 | 5.39544800  | 2.42529700  |
| O  | -5.73873400 | 4.56726300  | -0.00851000 |
| O  | -8.50863800 | 2.26750000  | -0.00715100 |
| O  | -6.85623200 | 3.09894900  | -1.88915700 |
| O  | -5.76811600 | 5.38457300  | -2.44597600 |
| Si | -7.35592800 | -3.42659600 | 1.54935700  |
| Si | -7.35175300 | -3.43348700 | -1.53501300 |
| O  | -6.22084100 | -4.17005900 | 2.37045100  |
| O  | -7.07417900 | -3.66536400 | 0.00804700  |
| O  | -6.21436300 | -4.18064000 | -2.34961100 |
| Si | -5.43084500 | -4.37620400 | 3.73347300  |
| O  | -4.87745900 | -5.86210700 | 3.77494400  |
| O  | -6.41386900 | -4.14042100 | 4.95103200  |
| Si | -7.28383800 | -3.50446900 | 6.10651900  |
| Si | -4.43501600 | -7.22233900 | 4.45268900  |
| Si | -5.42065400 | -4.39287300 | -3.70956900 |
| O  | -4.86721300 | -5.87887800 | -3.74296500 |
| O  | -6.40044100 | -4.16242100 | -4.93081900 |
| Si | -7.26721900 | -3.53168700 | -6.09154000 |
| Si | -4.42293800 | -7.24211900 | -4.41337800 |
| O  | 5.67070400  | -2.97783400 | 3.78288600  |
| O  | 5.68095900  | -2.99461600 | -3.73498700 |
| O  | 6.59953800  | 0.53821700  | 3.89171000  |
| O  | 6.61009600  | 0.52092800  | -3.85696600 |
| O  | 5.61463200  | 3.61270800  | 1.89159800  |
| O  | 5.61976000  | 3.60430600  | -1.87328800 |
| O  | 2.60333300  | 5.84031300  | 1.80292000  |
| O  | 2.60823800  | 5.83226300  | -1.80275900 |
| O  | -1.37369700 | 5.74917400  | 2.35491800  |
| O  | -1.36729200 | 5.73861000  | -2.36519300 |
| Si | -6.13082300 | 6.03525200  | 3.83819500  |
| Si | -6.12033100 | 6.01807000  | -3.86267700 |
| Si | -1.41613500 | 6.57024800  | 3.71452400  |

|    |             |             |             |
|----|-------------|-------------|-------------|
| Si | -1.40598100 | 6.55365100  | -3.72853900 |
| Si | 6.82778700  | 4.57753300  | 1.53889900  |
| Si | 6.83195700  | 4.57070500  | -1.52159100 |
| Si | 2.85203800  | 7.36950900  | 1.52385400  |
| Si | 2.85620100  | 7.36269500  | -1.52984100 |
| O  | -5.35173600 | 7.42463600  | 3.96155800  |
| O  | -5.34090400 | 7.40689200  | -3.99011300 |
| O  | -0.17580700 | 7.53766400  | 3.78925800  |
| O  | -2.75522400 | 7.41963000  | 3.74820700  |
| O  | -0.16546000 | 7.52072200  | -3.80421600 |
| O  | -2.74497900 | 7.40285500  | -3.76966400 |
| Si | -3.99646200 | 8.13701900  | 4.41901900  |
| Si | -3.98438000 | 8.11724000  | -4.44705200 |
| O  | 4.36365100  | 7.73546000  | 1.83289300  |
| O  | 1.88592900  | 8.30643300  | 2.39934800  |
| O  | 2.54286100  | 7.70762200  | -0.00422900 |
| O  | 4.36865300  | 7.72727300  | -1.83639200 |
| O  | 1.89248700  | 8.29569700  | -2.41213600 |
| Si | 1.06326200  | 8.50213300  | 3.74759300  |
| Si | 1.07349400  | 8.48537300  | -3.76347900 |
| O  | 6.38189600  | 6.06863600  | 1.76776300  |
| O  | 8.07640900  | 4.20385900  | 2.44683600  |
| O  | 7.28160800  | 4.40088900  | 0.00960500  |
| O  | 6.38670000  | 6.06076500  | -1.75832500 |
| O  | 8.08304600  | 4.19299100  | -2.42444900 |
| Si | 5.82204100  | 7.41357600  | 2.38150200  |
| Si | 5.82852400  | 7.40295200  | -2.37958300 |
| Si | 8.62394000  | 3.72864100  | 3.86344600  |
| Si | 8.63443700  | 3.71146000  | -3.83742800 |
| Si | 8.06679500  | 0.75240900  | 4.44202800  |
| Si | 8.07884400  | 0.73267000  | -4.40423900 |
| O  | 8.62284100  | 2.14697000  | 3.92867500  |
| O  | 8.63350000  | 2.12951300  | -3.89560000 |
| O  | 9.01713400  | -0.38124600 | 3.82935200  |
| O  | 9.02750400  | -0.39823400 | -3.78392100 |
| Si | 9.48925200  | -1.89540800 | 3.78227400  |
| Si | 9.49949000  | -1.91216600 | -3.72880100 |
| O  | 8.25012400  | -2.85979600 | 3.82393900  |
| O  | 8.26046600  | -2.87673700 | -3.76953800 |
| Si | 7.00978900  | -3.82721800 | 3.74920700  |
| Si | 7.01993400  | -3.84381900 | -3.69386900 |
| O  | 7.05223400  | -4.64828700 | 2.38959100  |
| O  | 7.05866400  | -4.65881800 | -2.33049400 |
| Si | 5.32437800  | -7.87269400 | 2.41493100  |

|    |             |             |             |
|----|-------------|-------------|-------------|
| Si | 5.33086600  | -7.88331500 | -2.34615000 |
| Si | 7.54710900  | -5.91616900 | 1.57519000  |
| Si | 7.55131200  | -5.92305100 | -1.50909900 |
| O  | 6.70030800  | -7.20360000 | 1.96891000  |
| O  | 6.70558000  | -7.21223200 | -1.89937500 |
| O  | 7.37687000  | -5.59719200 | 0.03204000  |
| H  | -5.32215200 | -8.32582400 | -3.99160200 |
| H  | -5.33308600 | -8.30791800 | 4.03330400  |
| H  | -8.68259700 | -3.94132400 | 5.99021100  |
| H  | -8.68341600 | -3.94417300 | 1.91097500  |
| H  | -8.67821800 | -3.95267700 | -1.89792900 |
| H  | -8.66629200 | -3.96802300 | -5.97709300 |
| H  | -6.75787900 | -3.97649700 | -7.39676400 |
| H  | -6.77805900 | -3.94344700 | 7.41510200  |
| H  | -7.59912200 | 0.51260900  | 6.09043100  |
| H  | -7.58258500 | 0.48537300  | -6.09423100 |
| H  | -9.26250800 | 2.55507300  | 2.31501800  |
| H  | -9.25616200 | 2.54470700  | -2.33253600 |
| H  | -7.56809700 | 6.33881500  | 3.89285900  |
| H  | -7.55745100 | 6.32137900  | -3.92260700 |
| H  | -5.70980000 | 5.10318400  | -4.93754700 |
| H  | -4.07579300 | 9.51784200  | 3.92107400  |
| H  | -3.85133800 | 8.12177200  | 5.88175700  |
| H  | -4.06506100 | 9.50026700  | -3.95549300 |
| H  | -3.83527700 | 8.09546500  | -5.90930700 |
| H  | -5.72322700 | 5.12517600  | 4.91825500  |
| H  | -4.22536400 | 3.12350300  | -6.14569500 |
| H  | -1.82643700 | 3.11342200  | -5.93693700 |
| H  | -4.24207800 | 3.15096400  | 6.13926500  |
| H  | -1.84259100 | 3.13987000  | 5.93709400  |
| H  | -1.39473500 | 5.63608000  | 4.84932900  |
| H  | -1.38150900 | 5.61441800  | -4.85910700 |
| H  | 1.93088600  | 8.23226000  | 4.90314800  |
| H  | 0.62591300  | 9.90488900  | 3.79121200  |
| H  | 0.63627700  | 9.88792000  | -3.81454900 |
| H  | 1.94426300  | 8.21035600  | -4.91544700 |
| H  | 2.13466600  | 4.50829200  | 3.85587300  |
| H  | 2.14517200  | 4.49109900  | -3.85101700 |
| H  | 5.77805700  | 7.27487900  | -3.84312200 |
| H  | 6.69551700  | 8.51685400  | -1.96914900 |
| H  | 6.69015200  | 8.52563900  | 1.96846900  |
| H  | 5.76758100  | 7.29203200  | 3.84545500  |
| H  | 7.81455500  | 4.32030000  | 4.93849600  |
| H  | 10.02270300 | 4.16549300  | 3.97975600  |

|    |             |             |             |
|----|-------------|-------------|-------------|
| H  | 10.03350900 | 4.14779700  | -3.95187300 |
| H  | 7.82798100  | 4.29831000  | -4.91730600 |
| H  | 4.50202200  | 1.53530700  | 4.88865500  |
| H  | 8.05018800  | 0.70027900  | 5.91101200  |
| H  | 10.35684500 | -2.16521500 | 4.93786500  |
| H  | 10.24908200 | -2.07610100 | 2.53692100  |
| H  | 4.51530900  | 1.51354600  | -4.86406700 |
| H  | 4.59066600  | -2.30200300 | -5.87462800 |
| H  | 10.37022400 | -2.18712100 | -4.88080600 |
| H  | 10.25591700 | -2.08729700 | -2.48058500 |
| H  | 4.57459100  | -2.27568800 | 5.91644100  |
| H  | 8.06624200  | 0.67398500  | -5.87301300 |
| H  | 7.04441900  | -4.78304400 | -4.82443000 |
| H  | 8.95794700  | -6.22582300 | -1.81010100 |
| H  | 8.95291900  | -6.21758700 | 1.88137600  |
| H  | 7.03119300  | -4.76138100 | 4.88401000  |
| H  | 5.33770300  | -9.25453000 | 1.91368500  |
| H  | 5.34281600  | -9.26290500 | -1.83871000 |
| H  | 2.70270300  | -5.27229200 | 4.95293700  |
| H  | 2.71615400  | -5.29431900 | -4.90284500 |
| H  | 0.67690900  | -9.63678200 | 1.89440800  |
| H  | 0.68198000  | -9.64509400 | -1.83042900 |
| H  | -0.70805400 | -7.93607000 | 4.90268900  |
| H  | -0.69476200 | -7.95783100 | -4.85002700 |
| H  | -0.79308600 | -4.28782000 | 5.91011000  |
| H  | -0.77695100 | -4.31421600 | -5.87400400 |
| H  | -4.42463800 | -7.07132100 | 5.91487500  |
| H  | -4.40857400 | -7.09762800 | -5.87618900 |
| H  | -3.28140700 | -1.00275900 | 7.45572800  |
| H  | -3.26104500 | -1.03596200 | -7.44098000 |
| H  | 5.19981800  | -7.91210300 | -3.81001900 |
| H  | 5.18934200  | -7.89495000 | 3.87854800  |
| Al | -3.49097000 | -0.48335700 | -1.38917100 |
| Si | -2.87507700 | -2.34881900 | 3.67702800  |
| Si | -3.55172800 | -0.43283500 | 1.47271100  |
| Si | -2.97550600 | 2.44897600  | 2.23617000  |
| Si | -6.60067400 | -0.47250700 | 2.30422300  |
| Si | -2.96317500 | 2.40744700  | -2.24211100 |
| Si | -2.86599300 | -2.37802200 | -3.64456600 |
| Si | -6.57626600 | -0.47799900 | -2.29305800 |
| O  | -2.71376600 | -1.31947200 | 2.50399200  |
| O  | -2.88273900 | 1.02773500  | 1.52610100  |
| O  | -3.36468500 | -1.22641800 | 0.13697700  |
| O  | -5.10589700 | -0.23562200 | 1.84819700  |

|    |             |             |             |
|----|-------------|-------------|-------------|
| O  | -5.13264600 | -0.23809000 | -1.76158300 |
| O  | -2.69125900 | -1.82130000 | -2.16893100 |
| O  | -2.65479400 | 0.93416700  | -1.79441100 |
| O  | -1.43997800 | -3.00662500 | -3.88543100 |
| O  | -1.49017800 | -3.09247000 | 3.70645000  |
| O  | 0.78577700  | -4.06850900 | -3.90344900 |
| O  | 0.78540200  | -4.00514800 | 4.00692400  |
| O  | 2.98805000  | -2.90018200 | -4.08245900 |
| O  | 4.18072000  | -0.71498200 | -4.03756700 |
| O  | 4.52757600  | 1.11447300  | -2.32485300 |
| O  | 2.98600300  | 3.15283200  | -1.81052600 |
| O  | 0.58973700  | 3.92389700  | -2.11116600 |
| O  | -1.77485600 | 3.23427600  | -1.54452300 |
| O  | -1.70017100 | 3.19324300  | 1.65428800  |
| O  | 0.61513600  | 3.93297000  | 2.11845500  |
| O  | 3.00019800  | 3.15431500  | 1.83404100  |
| O  | 2.99054300  | -2.87850400 | 4.08629600  |
| O  | 4.15277700  | -0.69084300 | 4.07041800  |
| O  | 4.52789300  | 1.10869200  | 2.34165400  |
| O  | 4.54138400  | 2.01712900  | 0.00679400  |
| O  | -0.47268500 | 5.00405500  | 0.00961100  |
| Si | -0.67010400 | -4.23861500 | -4.47978500 |
| Si | 2.33830300  | -4.33618000 | -3.91629900 |
| Si | -0.69503000 | -4.21406100 | 4.49344800  |
| Si | 2.33032200  | -4.31331600 | 3.96229400  |
| Si | 4.35210300  | -2.19462700 | 4.52004700  |
| Si | 4.36376100  | -2.22104800 | -4.48379000 |
| Si | 4.91825900  | 0.66541900  | -3.80049900 |
| Si | 4.90552200  | 0.68038800  | 3.82830500  |
| Si | 4.39481000  | 2.46986100  | -1.50907300 |
| Si | 4.40303400  | 2.46329700  | 1.52449700  |
| Si | 2.11773300  | 4.33593400  | 2.45319400  |
| Si | 2.09619300  | 4.32713200  | -2.44340400 |
| Si | -0.75352900 | 4.45005700  | 1.47892500  |
| Si | -0.77789300 | 4.44723300  | -1.45981900 |
| C  | -0.49298100 | -2.64986500 | 0.27316000  |
| H  | -0.90443100 | -2.16128200 | 1.14880200  |
| H  | 0.57862800  | -2.58038700 | 0.12861100  |
| C  | -1.29920000 | -3.39735500 | -0.55760600 |
| H  | -1.85700100 | -2.51210000 | -1.28606800 |
| H  | -0.81953000 | -4.06214600 | -1.27373900 |
| H  | -2.25305500 | -3.71951300 | -0.13600400 |
| O  | -0.16221600 | -0.39965600 | -0.47255000 |
| C  | 0.19727100  | -0.25461600 | -1.84362700 |

|   |             |             |             |
|---|-------------|-------------|-------------|
| H | -0.00312900 | 0.77706000  | -2.15251200 |
| H | -0.47600500 | -0.89865200 | -2.41025700 |
| C | 0.18482200  | 0.73841500  | 0.31712000  |
| H | 1.10922200  | 1.18463900  | -0.07286100 |
| C | 1.63791200  | -0.64758500 | -2.08879900 |
| H | 1.80401600  | -1.70290000 | -1.85160700 |
| H | 1.88867200  | -0.51286500 | -3.14178500 |
| H | 2.33643100  | -0.04914700 | -1.49908200 |
| H | -0.62008800 | 1.47229600  | 0.21705000  |
| C | 0.38721400  | 0.34325500  | 1.76444000  |
| H | 1.21724200  | -0.36218200 | 1.87328700  |
| H | 0.62150200  | 1.24097800  | 2.34240100  |
| H | -0.51715200 | -0.10273200 | 2.18494300  |

## TS15

|    |             |             |             |
|----|-------------|-------------|-------------|
| O  | -4.21729200 | 3.44049200  | 1.76802200  |
| O  | -3.17498100 | 2.57505000  | 3.94871600  |
| O  | -7.36600000 | -1.73559100 | 1.88482300  |
| O  | -7.68650000 | 0.80764200  | 1.89718700  |
| O  | -6.68768900 | -0.34002500 | 3.97319600  |
| O  | -4.25537300 | -3.27154400 | 3.81638400  |
| O  | -3.11436500 | -1.30614500 | 5.00381000  |
| O  | -1.31267500 | -5.63983500 | 3.89925000  |
| O  | -4.25562600 | -3.28807100 | -3.77727900 |
| O  | -3.11426100 | -1.32832200 | -4.97331800 |
| O  | -1.31280500 | -5.65694400 | -3.84951000 |
| Si | -1.53472900 | -7.21063500 | 3.82990800  |
| Si | -1.53471700 | -7.22740200 | -3.77313900 |
| O  | 2.59306500  | -5.02577100 | 2.45917300  |
| O  | -3.09011400 | -7.54641300 | 3.92735000  |
| O  | -1.04301300 | -7.77073800 | 2.42143100  |
| O  | 2.59306800  | -5.03654200 | -2.41211200 |
| O  | -3.09014300 | -7.56360000 | -3.86913200 |
| O  | -1.04303700 | -7.78128200 | -2.36225300 |
| Si | 2.67978600  | -6.32998800 | 1.55663900  |
| Si | 0.22614900  | -8.22894200 | 1.56703800  |
| Si | 2.67977100  | -6.33673400 | -1.50384800 |
| Si | 0.22613800  | -8.23571600 | -1.50585700 |
| O  | 1.46747600  | -7.29527800 | 1.91097500  |
| O  | 4.03301000  | -7.09705400 | 1.79112700  |
| O  | 2.61194100  | -5.85432900 | 0.02529000  |
| O  | -0.19614500 | -8.10726500 | 0.03026700  |
| O  | 1.46746200  | -7.30357600 | -1.85391400 |

|    |             |             |             |
|----|-------------|-------------|-------------|
| O  | 4.03299800  | -7.10482600 | -1.73496300 |
| O  | -4.21743700 | 3.43267100  | -1.75821300 |
| O  | -3.17505800 | 2.55765300  | -3.93506300 |
| O  | -7.36595800 | -1.74381200 | -1.85209300 |
| O  | -7.68651300 | 0.79932100  | -1.87563100 |
| O  | -6.68772400 | -0.35753000 | -3.94659400 |
| Si | -3.65489100 | -0.39407600 | -6.13465500 |
| Si | -3.01695700 | 2.53167900  | -5.50958900 |
| Si | -6.70435300 | -0.41972300 | -5.51297200 |
| O  | -2.95564600 | 1.03548900  | -6.04107500 |
| O  | -5.23297800 | -0.23268100 | -6.06221100 |
| O  | -7.28304400 | -1.80704300 | -6.02091100 |
| Si | -3.01692500 | 2.55600900  | 5.52328200  |
| Si | -6.70432300 | -0.39532200 | 5.53970500  |
| Si | -3.65490800 | -0.36711000 | 6.16133300  |
| O  | -2.95560300 | 1.06215100  | 6.06138600  |
| O  | -7.28306300 | -1.78039700 | 6.05375800  |
| O  | -5.23291700 | -0.20592700 | 6.08807600  |
| Si | -5.57049100 | 4.20740500  | 1.53343100  |
| Si | -8.02410500 | 2.30848200  | 1.54383000  |
| Si | -5.57048900 | 4.20069300  | -1.52705200 |
| Si | -8.02417400 | 2.30171400  | -1.52912300 |
| O  | -6.78278300 | 3.24214700  | 1.88777800  |
| O  | -5.65718700 | 5.51165600  | 2.43596000  |
| O  | -5.63831600 | 4.68310100  | 0.00208500  |
| O  | -8.44642500 | 2.43015600  | 0.00706500  |
| O  | -6.78280000 | 3.23384500  | -1.87711300 |
| O  | -5.65721400 | 5.50091100  | -2.43531800 |
| Si | -7.38738500 | -3.28256400 | 1.56188700  |
| Si | -7.38742300 | -3.28937200 | -1.52248700 |
| O  | -6.26384600 | -4.04501400 | 2.38145100  |
| O  | -7.11173200 | -3.52595100 | 0.02019700  |
| O  | -6.26381700 | -4.05547000 | -2.33861500 |
| Si | -5.47561200 | -4.26445700 | 3.74341600  |
| O  | -4.94718800 | -5.75944000 | 3.78411000  |
| O  | -6.45292000 | -4.01226600 | 4.96228800  |
| Si | -7.31055600 | -3.36185900 | 6.11894700  |
| Si | -4.52674000 | -7.12694100 | 4.46123200  |
| Si | -5.47559200 | -4.28092800 | -3.69963400 |
| O  | -4.94721500 | -5.77601100 | -3.73380500 |
| O  | -6.45299400 | -4.03400400 | -4.91957400 |
| Si | -7.31060300 | -3.38875200 | -6.07912400 |
| Si | -4.52677600 | -7.14648500 | -4.40484400 |
| O  | 5.64790200  | -3.05262000 | 3.77810900  |

|    |             |             |             |
|----|-------------|-------------|-------------|
| O  | 5.64788400  | -3.06920300 | -3.73977200 |
| O  | 6.63576400  | 0.44733900  | 3.88579100  |
| O  | 6.63573400  | 0.43025600  | -3.86289200 |
| O  | 5.69994400  | 3.53802700  | 1.88707400  |
| O  | 5.69992800  | 3.52972500  | -1.87781700 |
| O  | 2.72634300  | 5.81586600  | 1.80245900  |
| O  | 2.72632200  | 5.80791200  | -1.80322300 |
| O  | -1.25092000 | 5.79146500  | 2.35974100  |
| O  | -1.25096400 | 5.78102700  | -2.36037500 |
| Si | -6.00059800 | 6.15727600  | 3.84934900  |
| Si | -6.00062800 | 6.14030000  | -3.85153200 |
| Si | -1.27776200 | 6.61306900  | 3.71942300  |
| Si | -1.27777900 | 6.59667000  | -3.72364700 |
| Si | 6.92865300  | 4.48237200  | 1.53278800  |
| Si | 6.92864100  | 4.47562400  | -1.52770400 |
| Si | 3.00030900  | 7.34068700  | 1.52310300  |
| Si | 3.00030100  | 7.33395300  | -1.53059500 |
| O  | -5.19813800 | 7.53338100  | 3.97171200  |
| O  | -5.19817000 | 7.51585000  | -3.97996700 |
| O  | -0.02127300 | 7.55952800  | 3.79253500  |
| O  | -2.60236100 | 7.48480500  | 3.75490900  |
| O  | -0.02130200 | 7.54278700  | -3.80094700 |
| O  | -2.60238800 | 7.46823200  | -3.76296800 |
| Si | -3.83049000 | 8.22289500  | 4.42739100  |
| Si | -3.83052300 | 8.20335100  | -4.43869000 |
| O  | 4.51826100  | 7.68119900  | 1.83014200  |
| O  | 2.05122800  | 8.29365100  | 2.39990600  |
| O  | 2.69482100  | 7.68401600  | -0.00455800 |
| O  | 4.51825100  | 7.67310900  | -1.83914600 |
| O  | 2.05121200  | 8.28304300  | -2.41158300 |
| Si | 1.23375300  | 8.50306500  | 3.74924900  |
| Si | 1.23372300  | 8.48650500  | -3.76183100 |
| O  | 6.50815600  | 5.98073700  | 1.76228500  |
| O  | 8.17203300  | 4.08774600  | 2.43905500  |
| O  | 7.37741300  | 4.29821000  | 0.00288700  |
| O  | 6.50814200  | 5.97296100  | -1.76380700 |
| O  | 8.17201300  | 4.07700800  | -2.43223400 |
| Si | 5.97177000  | 7.33485600  | 2.37680300  |
| Si | 5.97174900  | 7.32435800  | -2.38428600 |
| Si | 8.71339200  | 3.60333600  | 3.85492300  |
| Si | 8.71336500  | 3.58636000  | -3.84595900 |
| Si | 8.10713800  | 0.63684600  | 4.43416400  |
| Si | 8.10710200  | 0.61734200  | -4.41211100 |
| O  | 8.68583000  | 2.02190300  | 3.92011000  |



|    |             |             |             |
|----|-------------|-------------|-------------|
| O  | 8.68580000  | 2.00465400  | -3.90417200 |
| O  | 9.03750100  | -0.51257000 | 3.82019500  |
| O  | 9.03747000  | -0.52935500 | -3.79308500 |
| Si | 9.48407600  | -2.03444100 | 3.77244900  |
| Si | 9.48405000  | -2.05099900 | -3.73863300 |
| O  | 8.22899100  | -2.97789600 | 3.81573700  |
| O  | 8.22895900  | -2.99463600 | -3.77774800 |
| Si | 6.97249600  | -3.92436000 | 3.74262600  |
| Si | 6.97247100  | -3.94076300 | -3.70045700 |
| O  | 6.99934600  | -4.74595700 | 2.38293300  |
| O  | 6.99932700  | -4.75636400 | -2.33715600 |
| Si | 5.21764800  | -7.94091000 | 2.41048400  |
| Si | 5.21763000  | -7.95140500 | -2.35060200 |
| Si | 7.47178800  | -6.02192700 | 1.56784200  |
| Si | 7.47177600  | -6.02872800 | -1.51645000 |
| O  | 6.60402100  | -7.29498300 | 1.96265300  |
| O  | 6.60400700  | -7.30351400 | -1.90563600 |
| O  | 7.30487600  | -5.70006300 | 0.02492800  |
| H  | -5.44349100 | -8.21496500 | -3.98190200 |
| H  | -5.44346100 | -8.19727200 | 4.04301200  |
| H  | -8.71660400 | -3.77516900 | 6.00448700  |
| H  | -8.72289100 | -3.77780200 | 1.92525600  |
| H  | -8.72289700 | -3.78620600 | -1.88365300 |
| H  | -8.71665100 | -3.80154900 | -5.96282900 |
| H  | -6.81053700 | -3.84198500 | -7.38503700 |
| H  | -6.81047800 | -3.80932900 | 7.42684500  |
| H  | -7.55839200 | 0.65994600  | 6.10338500  |
| H  | -7.55850400 | 0.63303400  | -6.08128900 |
| H  | -9.19227600 | 2.73022800  | 2.33024300  |
| H  | -9.19228100 | 2.71998500  | -2.31731700 |
| H  | -7.43250200 | 6.48491800  | 3.90593000  |
| H  | -7.43253300 | 6.46768900  | -3.90954300 |
| H  | -5.60694000 | 5.21870500  | -4.92697100 |
| H  | -3.88729400 | 9.60487900  | 3.92958800  |
| H  | -3.68370000 | 8.20514200  | 5.88993400  |
| H  | -3.88732500 | 9.58751400  | -3.94698600 |
| H  | -3.68374900 | 8.17914700  | -5.90114200 |
| H  | -5.60690000 | 5.24043400  | 4.92884100  |
| H  | -4.15754800 | 3.21444600  | -6.13714400 |
| H  | -1.75885300 | 3.16409200  | -5.93157500 |
| H  | -4.15747400 | 3.24158000  | 6.14782800  |
| H  | -1.75878200 | 3.19022400  | 5.94246700  |
| H  | -1.27053900 | 5.67861800  | 4.85417500  |
| H  | -1.27057800 | 5.65721400  | -4.85427100 |

|   |             |             |             |
|---|-------------|-------------|-------------|
| H | 2.09825900  | 8.21861100  | 4.90364200  |
| H | 0.82007000  | 9.91296200  | 3.79348700  |
| H | 0.82004100  | 9.89619400  | -3.81228200 |
| H | 2.09822000  | 8.19696600  | -4.91496300 |
| H | 2.23811400  | 4.49179800  | 3.85599700  |
| H | 2.23808800  | 4.47481000  | -3.85090100 |
| H | 5.91719400  | 7.19722100  | -3.84776000 |
| H | 6.85786100  | 8.42352900  | -1.97497600 |
| H | 6.85787600  | 8.43221000  | 1.96264700  |
| H | 5.91722300  | 7.21417000  | 3.84082500  |
| H | 7.91548000  | 4.20844500  | 4.93106400  |
| H | 10.11944300 | 4.01664300  | 3.96938500  |
| H | 10.11941100 | 3.99915800  | -3.96225100 |
| H | 7.91544000  | 4.18671700  | -4.92474800 |
| H | 4.55660700  | 1.47944600  | 4.88555200  |
| H | 8.09161200  | 0.58492900  | 5.90316800  |
| H | 10.34855300 | -2.31882900 | 4.92687900  |
| H | 10.23911000 | -2.22780000 | 2.52608100  |
| H | 4.55656700  | 1.45794500  | -4.86718100 |
| H | 4.56652900  | -2.35828200 | -5.87794300 |
| H | 10.34851400 | -2.34047400 | -4.89180200 |
| H | 10.23909000 | -2.23886300 | -2.49142900 |
| H | 4.56656400  | -2.33228100 | 5.91313800  |
| H | 8.09156300  | 0.55894900  | -5.88086800 |
| H | 6.97968500  | -4.88021000 | -4.83107400 |
| H | 8.87273000  | -6.35505400 | -1.81933100 |
| H | 8.87274600  | -6.34691600 | 1.87214900  |
| H | 6.97972400  | -4.85880700 | 4.87737500  |
| H | 5.20711000  | -9.32275100 | 1.90918400  |
| H | 5.20709500  | -9.33102600 | -1.84321500 |
| H | 2.64336500  | -5.29699600 | 4.95204300  |
| H | 2.64334800  | -5.31876300 | -4.90374900 |
| H | 0.54053600  | -9.62671900 | 1.89609200  |
| H | 0.54051800  | -9.63493300 | -1.82874800 |
| H | -0.81168800 | -7.90314800 | 4.90625700  |
| H | -0.81172100 | -7.92465000 | -4.84646900 |
| H | -0.83413300 | -4.25403400 | 5.91388800  |
| H | -0.83410200 | -4.28011800 | -5.87023700 |
| H | -4.51188500 | -6.97618900 | 5.92340600  |
| H | -4.51193100 | -7.00218400 | -5.86766900 |
| H | -3.26490900 | -0.92774700 | 7.46290100  |
| H | -3.26490100 | -0.96055600 | -7.43382300 |
| H | 5.08417200  | -7.97791900 | -3.81429500 |
| H | 5.08420200  | -7.96096900 | 3.87427900  |

|    |             |             |             |
|----|-------------|-------------|-------------|
| Al | -3.46021400 | -0.33602100 | -1.43952000 |
| Si | -2.87752300 | -2.29518100 | 3.69060600  |
| Si | -3.53957500 | -0.37102500 | 1.46711000  |
| Si | -2.90156400 | 2.51818000  | 2.24367000  |
| Si | -6.58332700 | -0.34122500 | 2.31670100  |
| Si | -2.87689800 | 2.52363600  | -2.23333800 |
| Si | -2.88645400 | -2.30807600 | -3.63425100 |
| Si | -6.56855900 | -0.34753500 | -2.28888500 |
| O  | -2.76112700 | -1.39970500 | 2.40728400  |
| O  | -2.81391600 | 1.05117500  | 1.62132300  |
| O  | -3.37144200 | -1.10179500 | 0.08165800  |
| O  | -5.09366300 | -0.14489000 | 1.82287200  |
| O  | -5.10093400 | -0.14860900 | -1.80629700 |
| O  | -2.54499100 | -1.56624000 | -2.26306500 |
| O  | -2.57223600 | 1.06780800  | -1.72560800 |
| O  | -1.49724000 | -2.99799400 | -3.88710600 |
| O  | -1.48748400 | -3.00765300 | 3.77654500  |
| O  | 0.74123900  | -4.02481100 | -3.90919800 |
| O  | 0.75665400  | -4.00823400 | 4.02870200  |
| O  | 2.96042800  | -2.92493500 | -4.06204300 |
| O  | 4.17114700  | -0.76149200 | -4.03382700 |
| O  | 4.55642900  | 1.05246600  | -2.32628600 |
| O  | 3.07010000  | 3.12669200  | -1.80910000 |
| O  | 0.68462700  | 3.93803100  | -2.10792600 |
| O  | -1.70313700 | 3.34857400  | -1.52798700 |
| O  | -1.63677100 | 3.24059700  | 1.61059900  |
| O  | 0.69009900  | 3.93759700  | 2.15860900  |
| O  | 3.07291100  | 3.14006800  | 1.80582400  |
| O  | 2.97336200  | -2.90732300 | 4.08352400  |
| O  | 4.17481400  | -0.73989200 | 4.06881700  |
| O  | 4.55652800  | 1.06499400  | 2.34596700  |
| O  | 4.61549200  | 1.95691100  | 0.00579200  |
| O  | -0.31782200 | 5.04737000  | 0.03061800  |
| Si | -0.71823600 | -4.21976800 | -4.47707600 |
| Si | 2.28558000  | -4.35236700 | -3.91560100 |
| Si | -0.72564200 | -4.18612900 | 4.50265000  |
| Si | 2.29254600  | -4.33270100 | 3.96039700  |
| Si | 4.34408100  | -2.24714600 | 4.51737400  |
| Si | 4.34291000  | -2.26841700 | -4.48290700 |
| Si | 4.94393200  | 0.60216700  | -3.80228000 |
| Si | 4.94384800  | 0.62043900  | 3.82461400  |
| Si | 4.46203300  | 2.41044000  | -1.50884300 |
| Si | 4.46409300  | 2.41608600  | 1.51893800  |
| Si | 2.20863600  | 4.32031100  | 2.45319900  |

|    |             |             |             |
|----|-------------|-------------|-------------|
| Si | 2.19825600  | 4.31033800  | -2.44340100 |
| Si | -0.65246300 | 4.47837700  | 1.48598500  |
| Si | -0.65225100 | 4.51018600  | -1.43876200 |
| C  | 0.50849600  | -1.98435500 | -0.98107600 |
| H  | 0.79714600  | -2.99140700 | -1.26664900 |
| H  | 0.72338100  | -1.70113100 | 0.04142600  |
| C  | 0.01716100  | -1.09527000 | -1.90696500 |
| H  | -1.24478400 | -1.46610000 | -1.95865700 |
| H  | -0.06589900 | -0.04421200 | -1.64205200 |
| H  | 0.20003800  | -1.33409500 | -2.95375700 |
| O  | -1.05263500 | -3.13363100 | 0.34125800  |
| H  | -1.47120800 | -2.46867200 | 0.90198500  |
| H  | -1.81554300 | -3.58554700 | -0.06879000 |
| O  | -3.51642800 | -3.80290700 | -0.58823600 |
| H  | -3.76954100 | -2.91450500 | -0.29229700 |
| H  | -4.21162100 | -4.40912600 | -0.31776200 |

## TS16

|    |             |             |             |
|----|-------------|-------------|-------------|
| O  | -4.31592600 | 3.31856600  | 1.77992700  |
| O  | -3.25879900 | 2.47134200  | 3.96064400  |
| O  | -7.35416200 | -1.92342900 | 1.88220400  |
| O  | -7.72862500 | 0.61239600  | 1.89877900  |
| O  | -6.70883500 | -0.51771400 | 3.97421900  |
| O  | -4.21456700 | -3.39661700 | 3.81578600  |
| O  | -3.11737400 | -1.40967400 | 5.00863700  |
| O  | -1.22236300 | -5.70203400 | 3.89887200  |
| O  | -4.20287600 | -3.39882500 | -3.77788600 |
| O  | -3.10156800 | -1.41302700 | -4.96850200 |
| O  | -1.21030000 | -5.70452900 | -3.84989600 |
| Si | -1.41089700 | -7.27706300 | 3.82627200  |
| Si | -1.39892200 | -7.27948700 | -3.77678400 |
| O  | 2.67164800  | -5.00245000 | 2.46605500  |
| O  | -2.95894700 | -7.64597800 | 3.92065500  |
| O  | -0.90524600 | -7.82393900 | 2.41753200  |
| O  | 2.67931700  | -5.00403200 | -2.40523500 |
| O  | -2.94670700 | -7.64845800 | -3.87583500 |
| O  | -0.89774400 | -7.82546000 | -2.36615800 |
| Si | 2.78742800  | -6.30282700 | 1.56124300  |
| Si | 0.37466500  | -8.25347600 | 1.56428000  |
| Si | 2.79222900  | -6.30380100 | -1.49924700 |
| Si | 0.37948800  | -8.25445200 | -1.50861800 |
| O  | 1.59535500  | -7.29431100 | 1.91189100  |
| O  | 4.15627900  | -7.04142400 | 1.79642900  |

|    |             |             |             |
|----|-------------|-------------|-------------|
| O  | 2.71183300  | -5.82582900 | 0.03067400  |
| O  | -0.04777300 | -8.13789500 | 0.02707800  |
| O  | 1.60126500  | -7.29550800 | -1.85300300 |
| O  | 4.16181500  | -7.04254400 | -1.72966600 |
| O  | -4.31052200 | 3.31739200  | -1.74631300 |
| O  | -3.24647000 | 2.46881500  | -3.92314500 |
| O  | -7.34824000 | -1.92460000 | -1.85471600 |
| O  | -7.72270100 | 0.61119200  | -1.87404300 |
| O  | -6.69640600 | -0.52028000 | -3.94558000 |
| Si | -3.66014400 | -0.48828400 | -6.12895200 |
| Si | -3.08545000 | 2.44917400  | -5.49746700 |
| Si | -6.70931900 | -0.57985800 | -5.51209400 |
| O  | -2.99156300 | 0.95562900  | -6.03162800 |
| O  | -5.24141200 | -0.36057500 | -6.05868000 |
| O  | -7.25763900 | -1.97819500 | -6.02350900 |
| Si | -3.10277800 | 2.45269300  | 5.53541700  |
| Si | -6.72668200 | -0.57630600 | 5.54059500  |
| Si | -3.67950600 | -0.48451300 | 6.16705000  |
| O  | -3.01056400 | 0.95946200  | 6.07084700  |
| O  | -7.27665700 | -1.97432500 | 6.05117300  |
| O  | -5.26046900 | -0.35674000 | 6.09162100  |
| Si | -5.68474900 | 4.05700900  | 1.54463800  |
| Si | -8.09749000 | 2.10639200  | 1.54767400  |
| Si | -5.67993100 | 4.05607100  | -1.51584800 |
| Si | -8.09272400 | 2.10541900  | -1.52528200 |
| O  | -6.87680500 | 3.06555700  | 1.89529600  |
| O  | -5.80050400 | 5.35742100  | 2.44944500  |
| O  | -5.76032300 | 4.53404500  | 0.01407200  |
| O  | -8.51995300 | 2.22196800  | 0.01047800  |
| O  | -6.87089700 | 3.06435700  | -1.86959900 |
| O  | -5.79286600 | 5.35586400  | -2.42183800 |
| Si | -7.34219300 | -3.46989600 | 1.55636900  |
| Si | -7.33737800 | -3.47088700 | -1.52800800 |
| O  | -6.20396600 | -4.20985800 | 2.37627700  |
| O  | -7.05907900 | -3.70446600 | 0.01466400  |
| O  | -6.19650900 | -4.21140800 | -2.34379300 |
| Si | -5.41333000 | -4.41508000 | 3.73906700  |
| O  | -4.85333600 | -5.89857700 | 3.77781800  |
| O  | -6.39763300 | -4.18600000 | 4.95687100  |
| Si | -7.27065400 | -3.55613500 | 6.11338900  |
| Si | -4.40497100 | -7.25811600 | 4.45306300  |
| Si | -5.40159600 | -4.41751100 | -3.70399200 |
| O  | -4.84153300 | -5.90096800 | -3.74010500 |
| O  | -6.38216000 | -4.18909900 | -4.92500200 |

|    |             |             |             |
|----|-------------|-------------|-------------|
| Si | -7.25150800 | -3.56001900 | -6.08469600 |
| Si | -4.39105600 | -7.26093700 | -4.41302400 |
| O  | 5.68187100  | -2.96736300 | 3.79342900  |
| O  | 5.69368300  | -2.96976400 | -3.72446100 |
| O  | 6.59500800  | 0.55257800  | 3.90914300  |
| O  | 6.60717100  | 0.55011100  | -3.83954900 |
| O  | 5.59680800  | 3.62645800  | 1.91469300  |
| O  | 5.60271600  | 3.62525800  | -1.85020200 |
| O  | 2.57563100  | 5.84079100  | 1.82964200  |
| O  | 2.58128400  | 5.83963900  | -1.77604500 |
| O  | -1.40106200 | 5.73088300  | 2.38064700  |
| O  | -1.39367800 | 5.72934800  | -2.33947500 |
| Si | -6.15970800 | 5.99293600  | 3.86348900  |
| Si | -6.14762000 | 5.99048600  | -3.83740100 |
| Si | -1.44742500 | 6.54916500  | 3.74180600  |
| Si | -1.43573000 | 6.54680800  | -3.70127300 |
| Si | 6.80572300  | 4.59735100  | 1.56408300  |
| Si | 6.81052600  | 4.59637600  | -1.49641200 |
| Si | 2.81757500  | 7.37161000  | 1.55354100  |
| Si | 2.82237100  | 7.37063600  | -1.50016100 |
| O  | -5.38684500 | 7.38553900  | 3.98965900  |
| O  | -5.37436400 | 7.38300600  | -3.96203000 |
| O  | -0.21143500 | 7.52195500  | 3.81863900  |
| O  | -2.79029200 | 7.39250800  | 3.77683200  |
| O  | -0.19951600 | 7.51953700  | -3.77485100 |
| O  | -2.77849100 | 7.39011500  | -3.74105400 |
| Si | -4.03484600 | 8.10308100  | 4.44875600  |
| Si | -4.02092900 | 8.10026000  | -4.41733500 |
| O  | 4.32748200  | 7.74370200  | 1.86358800  |
| O  | 1.84713100  | 8.30254900  | 2.43062100  |
| O  | 2.50719700  | 7.71125500  | 0.02604300  |
| O  | 4.33324500  | 7.74253300  | -1.80570400 |
| O  | 1.85468500  | 8.30101700  | -2.38087400 |
| Si | 1.02333300  | 8.49201000  | 3.77906700  |
| Si | 1.03512100  | 8.48961900  | -3.73202100 |
| O  | 6.35314600  | 6.08601400  | 1.79569800  |
| O  | 8.05581800  | 4.22751100  | 2.47156300  |
| O  | 7.26062800  | 4.42564600  | 0.03454900  |
| O  | 6.35868000  | 6.08488800  | -1.73039900 |
| O  | 8.06346400  | 4.22596100  | -2.39973100 |
| Si | 5.78718300  | 7.42727400  | 2.41188300  |
| Si | 5.79465400  | 7.42575700  | -2.34921200 |
| Si | 8.60518200  | 3.75203600  | 3.88737800  |
| Si | 8.61727200  | 3.74958600  | -3.81351300 |

|    |             |             |             |
|----|-------------|-------------|-------------|
| Si | 8.06118600  | 0.77225400  | 4.46017100  |
| Si | 8.07507000  | 0.76943600  | -4.38611500 |
| O  | 8.61111500  | 2.17025500  | 3.94959100  |
| O  | 8.62339600  | 2.16776500  | -3.87470000 |
| O  | 9.01668800  | -0.35598600 | 3.84553100  |
| O  | 9.02863700  | -0.35841000 | -3.76775800 |
| Si | 9.49555800  | -1.86793600 | 3.79566400  |
| Si | 9.50735100  | -1.87032700 | -3.71542600 |
| O  | 8.26073000  | -2.83791300 | 3.83523800  |
| O  | 8.27264600  | -2.84032900 | -3.75825500 |
| Si | 7.02473300  | -3.81070600 | 3.75840600  |
| Si | 7.03642000  | -3.81307000 | -3.68468600 |
| O  | 7.07110300  | -4.62898300 | 2.39723600  |
| O  | 7.07851100  | -4.63048600 | -2.32285800 |
| Si | 5.35762700  | -7.86109900 | 2.41607600  |
| Si | 5.36510000  | -7.86261300 | -2.34501600 |
| Si | 7.57178400  | -5.89309300 | 1.58052400  |
| Si | 7.57662500  | -5.89407500 | -1.50377300 |
| O  | 6.73065000  | -7.18503200 | 1.97161500  |
| O  | 6.73672200  | -7.18626600 | -1.89667900 |
| O  | 7.40042900  | -5.57193700 | 0.03794900  |
| H  | -5.28551600 | -8.34943800 | -3.99349900 |
| H  | -5.29811300 | -8.34688300 | 4.03142400  |
| H  | -8.66743000 | -3.99899400 | 5.99596100  |
| H  | -8.66743300 | -3.99406800 | 1.91672700  |
| H  | -8.66144500 | -3.99528600 | -1.89218600 |
| H  | -8.64864700 | -4.00280100 | -5.97136900 |
| H  | -6.73993500 | -4.00006700 | -7.39066200 |
| H  | -6.76318300 | -3.99535100 | 7.42123700  |
| H  | -7.60383000 | 0.45952100  | 6.10489200  |
| H  | -7.58477000 | 0.45559200  | -6.07979700 |
| H  | -9.27555400 | 2.50175100  | 2.33303700  |
| H  | -9.26824600 | 2.50027600  | -2.31452800 |
| H  | -7.59833200 | 6.28998800  | 3.91843300  |
| H  | -7.58606600 | 6.28750100  | -3.89704800 |
| H  | -5.73280400 | 5.07948900  | -4.91392800 |
| H  | -4.12023000 | 9.48448300  | 3.95342600  |
| H  | -3.88994600 | 8.08569000  | 5.91149100  |
| H  | -4.10786700 | 9.48197500  | -3.92315700 |
| H  | -3.87144100 | 8.08193700  | -5.87959800 |
| H  | -5.74827300 | 5.08262600  | 4.94189500  |
| H  | -4.23932600 | 3.10874800  | -6.12554100 |
| H  | -1.84041900 | 3.10895600  | -5.91630900 |
| H  | -4.25858300 | 3.11270900  | 6.15944500  |

|   |             |             |             |
|---|-------------|-------------|-------------|
| H | -1.85903100 | 3.11269100  | 5.95774600  |
| H | -1.42208800 | 5.61294000  | 4.87483400  |
| H | -1.40685000 | 5.60984900  | -4.83362300 |
| H | 1.89192300  | 8.22380400  | 4.93428400  |
| H | 0.57973100  | 9.89271900  | 3.82527000  |
| H | 0.59166900  | 9.89029800  | -3.78050700 |
| H | 1.90733200  | 8.22067900  | -4.88433200 |
| H | 2.11250000  | 4.50278400  | 3.87995600  |
| H | 2.12460200  | 4.50033300  | -3.82695200 |
| H | 5.74504500  | 7.30024900  | -3.81300300 |
| H | 6.65659500  | 8.54272400  | -1.93647800 |
| H | 6.65041400  | 8.54397700  | 2.00114900  |
| H | 5.73297600  | 7.30269600  | 3.87559100  |
| H | 7.79295500  | 4.33803300  | 4.96338700  |
| H | 10.00196100 | 4.19489300  | 4.00480800  |
| H | 10.01440900 | 4.19236900  | -3.92683800 |
| H | 7.80842400  | 4.33489600  | -4.89243600 |
| H | 4.49287500  | 1.53841100  | 4.90755700  |
| H | 8.04452400  | 0.71724900  | 5.92905000  |
| H | 10.36411600 | -2.13607900 | 4.95091800  |
| H | 10.25643100 | -2.04286800 | 2.55012500  |
| H | 4.50818100  | 1.53530600  | -4.84518700 |
| H | 4.60073700  | -2.27793700 | -5.86300200 |
| H | 10.37952800 | -2.13920300 | -4.86777400 |
| H | 10.26430600 | -2.04446600 | -2.46739100 |
| H | 4.58221900  | -2.27417600 | 5.92809200  |
| H | 8.06301700  | 0.71349600  | -5.85500000 |
| H | 7.06531200  | -4.75001800 | -4.81702900 |
| H | 8.98465500  | -6.19000600 | -1.80506200 |
| H | 8.97886300  | -6.18883000 | 1.88642200  |
| H | 7.05007500  | -4.74692700 | 4.89143100  |
| H | 5.37720500  | -9.24190400 | 1.91220000  |
| H | 5.38309500  | -9.24310000 | -1.84020300 |
| H | 2.72389100  | -5.27724700 | 4.95849500  |
| H | 2.73938400  | -5.28042200 | -4.89731000 |
| H | 0.71816500  | -9.64487900 | 1.89123500  |
| H | 0.72400800  | -9.64606600 | -1.83360900 |
| H | -0.67495400 | -7.95609200 | 4.90246800  |
| H | -0.65964200 | -7.95919900 | -4.85027000 |
| H | -0.77643900 | -4.31018500 | 5.91682200  |
| H | -0.75786200 | -4.31403900 | -5.86731700 |
| H | -4.39555300 | -7.10984100 | 5.91553500  |
| H | -4.37704700 | -7.11359400 | -5.87555300 |
| H | -3.27967500 | -1.03919500 | 7.46818600  |



|    |             |             |             |
|----|-------------|-------------|-------------|
| H  | -3.25622800 | -1.04390300 | -7.42855400 |
| H  | 5.23446900  | -7.88919500 | -3.80896200 |
| H  | 5.22240100  | -7.88674700 | 3.87962000  |
| Al | -3.48943000 | -0.49454700 | -1.40268500 |
| Si | -2.86380200 | -2.38856700 | 3.69589900  |
| Si | -3.55835700 | -0.45533400 | 1.47334500  |
| Si | -2.98456800 | 2.43002300  | 2.25611300  |
| Si | -6.60010700 | -0.51505900 | 2.31042800  |
| Si | -2.96860900 | 2.40267300  | -2.21750000 |
| Si | -2.85145200 | -2.38516900 | -3.62688100 |
| Si | -6.57524900 | -0.51229600 | -2.27784200 |
| O  | -2.77189500 | -1.34807700 | 2.52888600  |
| O  | -2.86916800 | 0.99431000  | 1.57959000  |
| O  | -3.24092200 | -1.21708600 | 0.13296400  |
| O  | -5.12894900 | -0.27334300 | 1.76974900  |
| O  | -5.14355300 | -0.27150800 | -1.70871200 |
| O  | -2.59708600 | -1.68870300 | -2.24774200 |
| O  | -2.65170800 | 0.95150300  | -1.71033400 |
| O  | -1.43075900 | -3.01851800 | -3.89467500 |
| O  | -1.45757100 | -3.07932000 | 3.74612700  |
| O  | 0.81068500  | -4.04059700 | -3.93239800 |
| O  | 0.80866000  | -4.00908200 | 4.04141200  |
| O  | 3.00500000  | -2.88575000 | -4.05413000 |
| O  | 4.16079600  | -0.69486600 | -4.01278000 |
| O  | 4.50117400  | 1.12471900  | -2.30824500 |
| O  | 2.97483400  | 3.16163000  | -1.78987700 |
| O  | 0.57963200  | 3.92870400  | -2.07799400 |
| O  | -1.78170500 | 3.24002000  | -1.53215200 |
| O  | -1.71395100 | 3.16751000  | 1.64795100  |
| O  | 0.59042200  | 3.92342200  | 2.15308900  |
| O  | 2.98257500  | 3.16462200  | 1.84116000  |
| O  | 3.00440200  | -2.87908100 | 4.08071200  |
| O  | 4.15443500  | -0.68846600 | 4.08341000  |
| O  | 4.50985300  | 1.12202000  | 2.36416700  |
| O  | 4.53329300  | 2.02435700  | 0.02695000  |
| O  | -0.48359000 | 5.00426800  | 0.04040700  |
| Si | -0.65403500 | -4.24632800 | -4.47596800 |
| Si | 2.35702000  | -4.32853800 | -3.90774600 |
| Si | -0.67715900 | -4.23225200 | 4.49980000  |
| Si | 2.34813200  | -4.32037400 | 3.96814000  |
| Si | 4.35907000  | -2.19423700 | 4.53081300  |
| Si | 4.37183900  | -2.19931600 | -4.46877900 |
| Si | 4.91171800  | 0.68287800  | -3.78300300 |
| Si | 4.90103900  | 0.68694500  | 3.84695100  |

|    |             |             |             |
|----|-------------|-------------|-------------|
| Si | 4.38515000  | 2.48171100  | -1.48824000 |
| Si | 4.38936400  | 2.47637600  | 1.54477600  |
| Si | 2.09361300  | 4.33443400  | 2.47656400  |
| Si | 2.08193000  | 4.33504700  | -2.41963900 |
| Si | -0.77429600 | 4.43614900  | 1.50322000  |
| Si | -0.78977200 | 4.45239500  | -1.43010100 |
| C  | 0.22422300  | -0.76666100 | 1.36785700  |
| H  | 1.03238200  | -1.44915000 | 1.61162700  |
| H  | -0.65458500 | -0.83913700 | 1.99615900  |
| C  | 0.37812600  | 0.24060800  | 0.42955500  |
| H  | 0.09130300  | -0.46635800 | -0.60864900 |
| H  | -0.36208100 | 1.03802100  | 0.41479600  |
| H  | 1.39778700  | 0.50735100  | 0.14829400  |
| O  | -0.79114000 | -2.58626700 | 0.47976400  |
| H  | -0.41538100 | -2.74213100 | -0.39521000 |
| H  | -1.70454300 | -2.28024700 | 0.31457000  |
| O  | -0.01389000 | -1.17934100 | -1.75221700 |
| H  | -0.95365100 | -1.29021900 | -2.05303500 |
| C  | 0.83094700  | -0.66855700 | -2.80221100 |
| H  | 1.81991400  | -0.55222500 | -2.35179100 |
| H  | 0.90376200  | -1.44404000 | -3.56537400 |
| C  | 0.31394700  | 0.63968200  | -3.36394500 |
| H  | 0.23858700  | 1.40886100  | -2.59209800 |
| H  | 0.99673100  | 0.99518100  | -4.14210300 |
| H  | -0.67394600 | 0.50435900  | -3.81359900 |
